# Supplementary material for: Differential impact of BTK active site inhibitors on the conformational state of full-length BTK
Source: eLife. 2020 Nov 23;9:e60470. doi: 10.7554/eLife.60470 (PMC7834017; doi:10.7554/eLife.60470)
Supplement: Source data 1. — The value of each deuterium difference for every colored box in each Figure can be found in this file. [file elife-60470-data1.xlsx]

## Sheet: Experimental Summary
	HDX Data: Summary and List of Experimental Parameters
	Data Set	wt BTK, wtBTK:Ibrutinib, and wtBTK:GDC-0853	wt BTK, wtBTK:CGI-1746, wtBTK:CC-292, and wtBTK:Dasatinib	wtBTK, C481S-BTK, T316A-BTK, and T316A-BTK:Ibrutinib	wtBTK and T316A-Btk Ibrutinib titration
	HDX reaction details	Final D2O concentration=94.7%, pHread=7.60, 21 °C. See also footnote a
	HDX time course	5s, 10s, 30s, 1m, 10m, 1h, 4h	10s, 1m, 5m, 10m, 1h, 4h		10 min b
	HDX controls	16 undeuterated controls	10 undeuterated controls		8 undeuterated controls
	Back-exchange	30-35%
	Number of peptides	196 followed; 211 identified	243 followed; 319 identified	245 followed; 339 identified	238 followed; 278 identified
	Sequence coverage	94.6	95.5	95.5	97	peptide maps are found in each Figure tab
	Average peptide length; Redundancy	13.4;4.18	13.4; 5.14	13.3; 5.14	13.4; 4.96
	Peptide filtering parameters	0.25 products/amino acid; 3 consecutive products	0.25 products/amino acid; 2 consecutive products	0.25 products/amino acid; 2 consecutive products	0.30 products/amino acid; 2 consecutive products
	Replicates	See replication tab for details	See replication tab for details	See replication tab for details	See replication tab for details
	Repeatability c	+/- 0.25 relative Da
	Significant differences	> 0.5 Da
		a 18-fold dilution with labeling buffer [20 mM Tris pH 8.0, 150mM NaCl, 10% glycerol, 2% DMSO, 99.9% D2O].
		1:1 dilution with quench buffer [150 mM potassium phosphate, pH 2.4, H2O].
		b BTK:Ibrutinib molar ratios: 1:0, 1:0.2, 1:0.5, 1:1, 1:2
		c No statistical tests were applied to the HDX MS measurements. Rather, based on measurements of mean methodological error (+/- 0.14 Da; [Houde D, Berkowitz SA, Engen JR. J. Pharm. Sci. 2011;100(6):2071-2086]) we chose a value (+/- 0.25 Da) well above that as the threshold for calling differences in relative deuterium incorporation measurements meaningful. See also explanations of this methodolog…

## Sheet: Replication
	DESCRIPTION OF THE NUMBER OF REPLICATES PER EXPERIMENT
	wt BTK, wtBTK:Ibrutinib, and wt:GDC-0853											wt BTK, wtBTK:CGI-1746, wtBTK:CC-292, and wtBTK:Dasatinib
			Number of replicates								Number of replicates
		Time point	apo	+Ibrutinib	+GDC-0853					Time point	wtBTK	wtBTK:CGI-1746	wtBTK:CC-292	wtBTK:Dasatinib
		undeuterated controls	10	6	4					undeuterated controls	4	2	2	2
		5 sec	6	2	2					10 sec	4	2	2	3
		10 sec	9	5	3					1 min	4	2	2	3
		30 sec	5	2	2		.			5 min	2	1	1	1
		1 min	5	2	2					10 min	4	2	2	3
		10 min	8	5	2					1 hr	4	2	2	2
		1 hr	7	4	3					4 hr	4	2	2	2
		4 hr	5	2	2
	wtBTK, C481S-BTK, T316A-BTK, and T316A-BTK:Ibrutinib								wtBTK and T316A-BTK Ibrutinib titration
			Number of replicates								Number of replicates
		Time point	wtBTK	C481S BTK	T316A BTK/ T316ABTK:Ibrutinib					[BTK]:[Ibrutinib]	wtBTK	wtBTK:Ibrutinib	T316A	T316ABTK:Ibrutinib
		undeuterated controls	4	2	2/2					undeuterated controls	2	2	2	2
		10 sec	4	2	2/2					1:0	2	-	2	-
		1 min	4	2	2/2					1:0.2	-	2	-	2
		5 min	2	2	2/2					1:0.5	-	2	-	2
		10 min	4	2	2/2					1:1	-	3	-	3
		1 hr	4	2	2/2					1:2	-	2	-	2
		4 hr	4	2	2/2

## Sheet: Figure 5
	Relative Difference in Deuterium Incorporation peptides included in Figure 4																																				Relative Difference in Deuterium Incorporation All peptides
					wt:Ibrutinib-wt						wt:GDC-0853-wt						wt:CGI 1746-wt						wt:CC-292-wt						wt:Dasatinib-wt												wt:Ibr-wt
	Sequence	Start	End		10 sec	1 min	10min	1 hour	4 hours		10 sec	1 min	10min	1 hour	4 hours		10 sec	1 min	10min	1 hour	4 hours		10 sec	1 min	10min	1 hour	4 hours		10 sec	1 min	10min	1 hour	4 hours				Sequence	Start	End		5 sec	10 sec	30 sec	1 min	10 min	1 hour	4 hours		Sequence
	LKRSQQKKKTSPLNF	11	25		-0.1177	-0.1517	-0.144	-0.1869	-0.2004		-0.0719	-0.01	-0.085	0.0143	-0.0508		-0.3537	0.1135	0.1898	0.2213	0.216		0.147	-0.3316	0.0942	0.1824	0.1009		-0.3471	0.0166	0.2004	0.1869	0.0439				AAVILES	2	8		-0.0396	-0.0104	-0.0879	0.0363	0.018	0.0108	-0.0102		AAVILES
	LTVHKLSY	32	39		-0.084	-0.0933	-0.0469	-0.0653	-0.0497		0.0263	0.0321	0.019	0.0235	-0.0494		0.0235	0.028	0.0553	0.0526	0.1503		-0.0393	-0.0526	0.034	0.0145	0.0351		-0.0559	0.002	0.0037	0.0444	0.0362				LKRSQQKKKTSPLNF	11	25		-0.2053	-0.1177	-0.2335	-0.1517	-0.144	-0.1869	-0.2004		IFLKRSQQKKKTSPLN
	TVHKLSY	33	39		-0.0506	-0.0388	-0.0341	-0.0374	-0.0336		0.0471	0.032	0.0407	0.0131	-0.008		0.0888	0.0121	0.0503	0.0202	0.1869		-0.0421	-0.0624	0.0087	0.0015	0.0131		-0.1087	-0.113	-0.0231	0.0025	-0.0124				IFLKRSQQKKKTSPLNFKKRLFL	9	31		-0.4898	-0.0243	-0.1512	0.0487	-0.1925	-0.0847	0.2398		LKRSQQKKKTSPLN
	FERGRRGSKKGSIDVE	44	59		-0.2452	-0.0482	-0.151	-0.2242	-0.1296		0.0346	0.0628	0.0276	0.0615	-0.0781		-0.0743	-0.0373	-0.0411	0.114	0.1391		-0.0802	-0.328	-0.0989	0.0261	0.0352		-0.1574	-0.0034	-0.0084	-0.0611	0.1086				LKRSQQKKKTSPLNFKKRLFL	11	31		-0.3055	-0.1984	-0.3739	-0.0203	-0.2226	-0.292	-0.4004		LKRSQQKKKTSPLNF
	VEKITCVE	58	65		0.0142	0.0091	-0.0115	-0.0083	-0.0142		0.0365	-0.0287	0.0232	-0.0847	-0.0309		0.0882	0.0024	-0.0064	0.0363	0.2666		-0.0143	-0.0351	-0.0081	0.0148	0.0172		-0.1046	-0.0833	-0.0281	0.0184	-0.034				FKKRLFL	25	31		-0.0022	-0.0524	-0.0335	-0.0019	-0.0665	-0.065	-0.2409		LKRSQQKKKTSPLNFKKRLFL
	VETVIPEKNPPPERQIPRRGEE	64	85		-0.0108	0.039	-0.032	-0.057	-0.0756		-0.0384	0.2129	0.004	-0.061	0.0289		-0.2976	-0.0004	0.1125	0.2063	0.4058		0.0065	-0.1861	-0.0557	0.0898	0.1877		0.1152	0.1597	0.1145	0.3338	0.0473				LTVHKLSY	32	39		-0.0312	-0.084	-0.0617	-0.0933	-0.0469	-0.0653	-0.0497		LTVHKLSY
	VETVIPEKNPPPERQIPRRGEESSE	64	88		0.0742	-0.0197	-0.043	-0.1432	-0.1187		-0.2222	0.0571	-0.0995	-0.2249	-0.1023		-0.2796	-0.0699	-0.1193	0.1186	0.2568		-0.0559	-0.4916	-0.0504	0.0077	-0.202		0.1408	0.0183	0.2179	0.1828	0.0272				TVHKLSY	33	39		-0.0238	-0.0506	-0.0005	-0.0388	-0.0341	-0.0374	-0.0336		LTVHKLSYYE
	VETVIPEKNPPPERQIPRRGEESSEM	64	89		0.0994	-0.1252	-0.0866	-0.2299	-0.0162		-0.001	0.139	-0.0608	-0.08	-0.0792		-0.5923	-0.0269	-0.0925	0.1753	0.2352		-0.1655	-0.5471	-0.0302	-0.1155	-0.0112		0.0296	-0.0769	0.1613	-0.0566	-0.0518				LTVHKLSYYE	32	41		-0.0229	-0.0288	-0.0233	0.0787	0.0468	-0.0006	0.0599		TVHKLSY
	TVIPEKNPPPERQIPRRGEE	66	85		0.0555	0.0239	-0.0119	-0.1	-0.0643		0.0111	0.1383	0.0441	-0.0444	-0.0239		-0.0669	0.1014	0.2128	-0.0052	0.1688		-0.0203	-0.344	0.1461	0.0801	0.0177		0.044	0.0043	0.1845	0.18	0.1673				FERGRRGSKKGSIDVE	44	59		-0.1214	-0.2452	-0.1004	-0.0482	-0.151	-0.2242	-0.1296		FERGRRGSKKGSIDVE
	TVIPEKNPPPERQIPRRGEESSE	66	88		0.0381	-0.0406	-0.0137	-0.0979	-0.1187		0.0376	0.0749	0.0243	-0.0295	0.0514		-0.3801	0.1309	0.124	0.0704	0.1638		0.0117	-0.165	0.0116	0.164	0.083		0.0053	0.0314	0.0185	0.1398	-0.1273				VEKITCVE	58	65		0.0027	0.0142	0.0258	0.0091	-0.0115	-0.0083	-0.0142		FERGRRGSKKGSIDVEKITCVE
	TVIPEKNPPPERQIPRRGEESSEM	66	89		0.1217	0.1048	0.0553	-0.0175	0.0121		0.0039	0.0385	-0.1046	-0.1259	-0.2365		-0.4068	-0.0536	0.1169	0.0973	0.2791		0.0361	-0.3095	-0.0243	-0.0307	0.14		-0.1268	0.0977	-0.0009	0.1966	0.1024				VETVIPEKNPPPERQIPRRGEE	64	85		-0.0124	-0.0108	-0.1493	0.039	-0.032	-0.057	-0.0756		VEKITCVE
	ISIIERFPYPFQ	92	103		0.0168	-0.0164	0.0457	-0.0404	-0.06		0.1966	0.0574	0.1355	0.1223	0.1153		-0.1052	0.0021	0.01	0.0041	0.1194		-0.0743	-0.1339	-0.0634	-0.0114	-0.06		0.0198	0.0477	0.027	0.0825	-0.0285				VETVIPEKNPPPERQIPRRGEES	64	86		0.0101	-0.0983	-0.1269	-0.0149	-0.062	-0.0448	0.0086		VETVIPEKNPPPERQIPRRGEE
	VVYDEGPL	104	111		-0.0587	-0.0114	-0.0138	-0.0342	-0.007		0.0032	0.0346	0.0278	-0.002	-0.0116		-0.0086	-0.0274	-0.0485	-0.0257	0.0212		-0.0774	-0.0852	-0.0778	-0.0625	-0.0705		-0.0787	-0.0267	-0.0438	-0.039	-0.0777				TVIPEKNPPPERQIPRRGEE	66	85		-0.0596	0.0555	-0.1096	0.0239	-0.0119	-0.1	-0.0643		VETVIPEKNPPPERQIPRRGEES
	VVYDEGPLYVFSPTEE	104	119		-0.0542	0.0061	0.0686	-0.0497	-0.0565		0.0858	0.0925	0.0387	0.0292	0.0416		-0.1073	0.0438	0.0723	0.0749	0.1643		-0.0843	-0.2166	0.0166	0.0209	0.0387		-0.0615	-0.0254	0.052	0.1181	0.0102				VETVIPEKNPPPERQIPRRGEESSE	64	88		0.0295	0.0742	-0.1311	-0.0197	-0.043	-0.1432	-0.1187		VETVIPEKNPPPERQIPRRGEESSE
	VIRYNSDL	131	138		0.0164	-0.0051	-0.0378	-0.042	-0.0121		0.0188	0.0419	-0.0209	0.0287	0.0056		-0.1674	0.0756	-0.0744	-0.0075	-0.1165		-0.0668	-0.115	-0.1143	-0.0639	-0.0811		-0.0973	0.0116	-0.0871	-0.0769	-0.0719				TVIPEKNPPPERQIPRRGEES	66	86		-0.036	-0.0358	-0.1581	-0.0876	-0.0093	-0.1604	-0.0198		VETVIPEKNPPPERQIPRRGEESSEM
	VQKYHPCF	139	146		-0.0584	-0.0187	-0.0033	-0.0288	-0.0599		-0.0308	-0.0512	-0.0311	-0.0825	-0.0682		0.0421	0.0225	0.0225	-0.0033	0.1556		-0.0569	-0.0736	-0.0356	-0.0221	-0.0205		-0.0501	0.0016	-0.0327	-0.004	0.0085				VETVIPEKNPPPERQIPRRGEESSEM	64	89		-0.1759	0.0994	-0.3069	-0.1252	-0.0866	-0.2299	-0.0162		TVIPEKNPPPERQIPRRGEE
	QKYHPCF	140	146		-0.0166	-0.0085	-0.0192	-0.0296	-0.026		-0.0275	-0.0345	0.0272	-0.0069	0.1409		0.0753	0.0145	0.0276	0.0636	0.2697		-0.0403	-0.0409	-0.0186	0.0043	-0.0053		-0.0424	-0.0329	0.028	0.0548	-0.0424				TVIPEKNPPPERQIPRRGEESSE	66	88		0.0164	0.0381	-0.1503	-0.0406	-0.0137	-0.0979	-0.1187		TVIPEKNPPPERQIPRRGEES
	LCCSQTAKNAMGCQ	153	166		-0.0607	-0.059	-0.0627	-0.1309	-0.0692		0.0457	0.0263	0.0746	-0.0148	-0.0296		-0.0462	0.03	-0.0203	0.1194	0.1695		0.0375	-0.0242	0.057	0.1523	0.2106		-0.0505	0.0652	0.1483	0.1991	0.0703				TVIPEKNPPPERQIPRRGEESSEM	66	89		-0.047	0.1217	-0.0562	0.1048	0.0553	-0.0175	0.0121		TVIPEKNPPPERQIPRRGEESSE
	CCSQTAKNAMGCQ	154	166		-0.0467	0.0034	-0.0079	-0.1554	-0.1335		-0.1031	0.0446	0.0107	-0.0664	-0.0556		-0.0332	0.044	0.0962	0.0531	0.2442		-0.1	-0.0632	0.032	0.0152	0.1626		-0.1292	0.085	0.0723	0.0184	0.0844				ISIIERFPYPFQ	92	103		0.045	0.0168	0.0112	-0.0164	0.0457	-0.0404	-0.06		TVIPEKNPPPERQIPRRGEESSEM
	ILENRNGSLKPGSS	167	180		-0.0175	-0.098	-0.0329	-0.1633	-0.1198		-0.0444	0.0914	-0.0051	0.3191	-0.2309		-0.1687	0.0168	0.1271	0.1123	0.0805		-0.0401	-0.0426	0.0142	0.1081	0.056		-0.0314	0.1084	0.0742	0.0607	-0.0463				IIERFPYPFQ	94	103		0.0319	-0.0349	-0.0244	0.012	-0.0378	-0.0475	-0.0039		PEKNPPPERQIPRRGEE
	ILENRNGSLKPGSSHRKTKKPLPPTPEE	167	194		-0.1999	-0.1565	-0.1964	-0.2124	-0.2261		-0.0784	0.1206	-0.0458	0.1932	0.1619		-0.3222	0.0848	0.3262	0.2386	0.198		0.0534	-0.0729	0.2173	0.213	0.1001		0.2445	0.2838	0.3432	0.1367	0.0384				IERFPYPFQ	95	103		-0.0215	-0.0981	-0.0543	-0.0726	-0.0935	-0.0694	-0.0417		ISIIERFPYPFQ
	DQILKKPLPPEPTAAPISTTE	195	215		0.2158	0.0974	0.0319	-0.0871	-0.0602		0.0017	0.0842	-0.0021	0.0024	0.0661		-0.4549	-0.0969	0.0736	0.0697	-0.087		-0.0924	-0.1965	-0.0459	0.0948	-0.1625		0.0821	0.0936	0.051	-0.0059	-0.0876				IIERFPYPFQVVY	94	106		-0.0111	-0.0156	-0.0638	-0.0216	-0.016	-0.0267	-0.0709		ISIIERFPYPFQVVYDEGPLYVFSPTEELRKRWIHQLKNVIRYNSDL
	ILKKPLPPEPTAAPIST	197	213		0.1648	-0.0006	0.0153	-0.082	-0.0035		0.3026	0.0977	-0.0384	-0.0254	0.04		-0.1812	-0.1825	0.0102	0.075	0.0075		0.1089	-0.1725	-0.1921	0.0644	-0.018		0.2448	-0.0056	0.0056	0.0531	0.0263				VVYDEGPL	104	111		-0.0023	-0.0587	-0.018	-0.0114	-0.0138	-0.0342	-0.007		IIERFPYPFQ
	ILKKPLPPEPTAAPISTTE	197	215		0.2181	0.1515	0.1164	-0.1177	0.0802		0.148	0.1483	100	-0.0449	-0.0024		-0.4569	-0.0917	0.0498	0.022	-0.1182		-0.0676	-0.2741	-0.0095	0.0426	-0.1597		-0.0553	0.0274	-0.0763	-0.0147	-0.1126				VVYDEGPLY	104	112		-0.0139	-0.0503	-0.0016	-0.0241	-0.0113	-0.0599	-0.0439		IIERFPYPFQVVY
	YDYMPMNA	223	230		0.4014	0.0811	0.1054	0.2072	0.2515		-0.0434	0.0557	0.0417	0.003	-0.0327		-0.0718	-0.0751	-0.0265	-0.0141	-0.0772		-0.027	-0.1127	-0.0807	-0.0399	-0.0546		0.5621	0.074	0.1875	0.4399	0.2066				VVYDEGPLYVF	104	114		0.0147	-0.0479	-0.0261	0.0167	0.0288	-0.053	0.006		IIERFPYPFQVVYDEGPLYVFSPTEELRKRWIHQLKNVIRYNSDL
	YDYMPMNAND	223	232		0.3773	0.1054	0.2664	0.2137	0.2319		-0.0142	0.0383	0.0171	-0.0213	-0.0198		-0.089	-0.0513	0.0213	0.006	-0.097		-0.0718	-0.1104	-0.0354	-0.0269	-0.1043		0.5535	0.221	0.4557	0.4571	0.2112				VVYDEGPLYVFSPTEE	104	119		0.0189	-0.0542	0.0251	0.0061	0.0686	-0.0497	-0.0565		IERFPYPFQ
	LQLRKGEE	233	240		0.0472	0.178	0.5517	0.9345	0.2756		0.0443	0.0236	0.0164	-0.1508	-0.1781		0.1715	0.058	0.0808	0.0605	0.1266		0.0222	0.0178	0.066	0.0474	0.1074		0.0723	0.2498	1.3256	1.4383	0.3932				VVYDEGPLYVFSPTEEL	104	120		0.0503	-0.0544	-0.1206	0.087	0.0643	0.0004	-0.107		VVYDEGPL
	LQLRKGEEY	233	241		-0.0002	0.1048	0.5578	1.1343	0.4779		-0.0387	-0.0549	-0.1337	-0.2809	-0.2396		0.3755	0.1061	0.065	0.1041	-0.1445		0.0402	0.0549	0.0156	0.1008	0.0936		0.0837	0.345	1.1341	1.556	0.5027				DEGPLYVFSPTEE	107	119		0.0354	-0.036	0.001	0.0147	0.0202	-0.0333	-0.0022		VVYDEGPLY
	ILEESNLPWWRARDKNGQE	243	261		-0.046	0.145	0.4538	0.7327	0.3912		-0.0241	0.0111	-0.1029	-0.3147	-0.1715		0.0486	0.044	-0.0299	0.1149	-0.1157		-0.0311	-0.0242	-0.1566	0.1105	0.075		0.0971	0.4584	1.165	1.2787	0.6479				VFSPTEE	113	119		-0.0663	-0.0215	-0.059	-0.0351	-0.0314	-0.1177	-0.1778		VVYDEGPLYVF
	ILEESNLPWWRARDKNGQEGYIPSN	243	267		0.1681	0.235	1.26	1.3594	0.6395		-0.0345	0.0096	-0.0857	-0.3346	-0.3242		0.3606	-0.001	-0.0561	0.0495	-0.3068		-0.0422	-0.0305	-0.0976	0.0903	0.0431		0.3205	0.5436	2.0209	1.8813	0.7525				VFSPTEEL	113	120		-0.0052	0.0011	0.0001	0.0094	-0.0021	-0.0201	-0.0018		VVYDEGPLYVFSPTEE
	ILEESNLPWWRARDKNGQEGYIPSNY	243	268		0.0962	0.2081	1.2805	1.4668	0.746		-0.043	0.0131	-0.1241	-0.3939	-0.3874		0.3501	0.1144	0.0772	0.0699	-0.3271		-0.0568	0.0162	-0.05	0.1635	0.0375		0.3357	0.6276	2.571	2.2295	0.9309				LRKRWIHQLKNVIRY	120	134		0.0222	-0.0087	-0.0536	-0.0172	-0.0258	-0.0064	-0.0187		VVYDEGPLYVFSPTEEL
	EESNLPWWRARDKNGQEGYIPSN	245	267		0.1358	0.3462	1.1322	1.3628	0.7173		-0.1022	-0.0108	-0.0823	-0.4167	-0.3237		0.3105	-0.1154	-0.2306	-0.0319	-0.7968		-0.061	-0.091	0.0599	0.1749	0.0053		0.3157	0.495	2.0499	1.9943	0.6767				VIRYNSDL	131	138		-0.0236	0.0164	-0.1081	-0.0051	-0.0378	-0.042	-0.0121		DEGPLYV
	EESNLPWWRARDKNGQEGYIPSNY	245	268		0.1373	0.3972	1.4162	1.3567	0.7392		-0.0622	-0.0253	-0.1101	-0.4644	-0.3243		0.3974	0.0593	0.0477	0.0805	-0.2341		-0.0641	-0.051	0.0039	0.1403	0.0071		0.3361	0.7362	2.329	2.1672	1.0401				VQKYHPCF	139	146		0.005	-0.0584	-0.0515	-0.0187	-0.0033	-0.0288	-0.0599		DEGPLYVFSPTEE
	AEDSIEM	272	278		0.1258	0.1295	-0.0412	-0.0494	-0.0656		-0.014	0.0103	0.0103	0.0093	0.0177		-0.0731	-0.026	-0.0318	0.0006	0.0044		-0.0122	-0.077	-0.0431	0.0014	0.0252		0.2253	0.2396	0.0322	0.027	0.0089				QKYHPCF	140	146		-0.0127	-0.0166	-0.029	-0.0085	-0.0192	-0.0296	-0.026		YVFSPTEE
	YEWYSKHMTRSQAEQL	279	294		0.2367	0.5021	0.7821	0.9387	0.2336		0.0051	-0.134	-0.2116	-0.278	-0.1571		0.3867	-0.2583	-0.3047	0.3028	0.3011		-0.0486	-0.1104	-0.2699	0.0851	0.1232		0.5294	0.628	1.4346	1.682	0.5616				WIDGQYL	147	153		-0.005	0.008	0.0081	-0.0148	0.0016	-0.0166	0.0176		VFSPTEE
	WYSKHMTRSQAEQL	281	294		0.1527	0.1455	0.4948	0.8707	0.1722		-0.0022	-0.0641	-0.0783	-0.211	-0.142		0.0535	0.0774	0.1621	0.1907	0.2064		-0.0203	-0.0692	0.0741	0.0881	0.0531		0.4818	0.445	1.291	1.5954	0.4897				WIDGQYLC	147	154		-0.02	-0.0437	-0.0366	-0.0518	-0.0258	-0.0693	-0.0353		VFSPTEEL
	YSKHMTRSQAEQL	282	294		0.0425	0.0565	0.4648	0.8407	0.2377		-0.0354	0.0088	-0.003	-0.1899	-0.1895		0.1211	0.0937	0.1119	0.1677	0.2736		0.0375	0.0039	0.0213	0.1487	0.1459		0.386	0.4242	1.1851	1.5395	0.5061				LCCSQTAKNAMG	153	164		-0.0584	0.0244	0.0384	0.0323	0.0298	-0.0498	-0.0861		LRKRWIHQLKN
	FAKSTGEPQGVIRH	320	333		-0.0421	0.033	0.1029	0.1166	-0.0297		-0.0098	0.089	-0.0017	-0.0188	0.0406		-0.1404	0.0358	0.1984	0.1113	0.1027		-0.0868	-0.1717	0.1427	0.1125	0.0798		0.0193	0.1581	0.4602	0.4515	0.0557				LCCSQTAKNAMGCQ	153	166		-0.0579	-0.0607	-0.1281	-0.059	-0.0627	-0.1309	-0.0692		LRKRWIHQLKNVIRY
	FAKSTGEPQGVIRHYVV	320	336		0.0027	0.0737	0.347	0.6337	0.1456		100	0.0009	-0.0374	100	-0.1681		-0.1395	0.0162	0.1048	0.1525	0.1994		-0.1335	-0.1704	-0.0562	0.0287	-0.0483		0.1192	0.2374	0.8501	1.1803	0.3991				CCSQTAKNAMGCQ	154	166		-0.0495	-0.0467	-0.056	0.0034	-0.0079	-0.1554	-0.1335		VIRYNSDL
	FAKSTGEPQGVIRHYVVC	320	337		0.0001	0.1372	0.464	0.7683	0.2462		-0.0925	0.0373	-0.0264	-0.1635	-0.1497		-0.3003	-0.0241	0.0925	0.0039	0.1807		-0.121	-0.2478	-0.0635	-0.0709	0.0667		0.097	0.3809	1.2394	1.1446	0.5066				SQTAKNAMG	156	164		-0.0063	-0.0248	-0.0671	0.006	-0.0244	-0.0891	-0.0568		VQKYHPCF
	AKSTGEPQGVIRHYVV	321	336		0.0517	0.1042	0.4046	0.6275	0.2325		-0.1051	0.0293	-0.0688	-0.1731	-0.1881		-0.0768	-0.0473	0.1489	0.1278	0.167		0.0143	-0.0599	0.0031	0.1765	0.0613		0.2003	0.1423	0.8535	1.2011	0.4812				SQTAKNAMGCQIL	156	168		0.0517	-0.0006	-0.0994	0.0412	0.0786	0.0327	0.087		QKYHPCF
	AKSTGEPQGVIRHYVVC	321	337		0.0048	0.0549	0.55	0.7833	0.2416		-0.191	-0.0885	-0.0813	-0.2238	-0.1091		-0.0655	-0.0746	0.1646	0.1241	0.146		-0.0274	-0.188	0.0673	0.0874	0.0153		0.3011	0.3542	1.2343	1.3144	0.5254				ILENRNGSLKPGSS	167	180		-0.1499	-0.0175	-0.1662	-0.098	-0.0329	-0.1633	-0.1198		WIDGQYL
	YVVCSTPQSQY	334	344		0.0639	0.1819	0.4821	0.4122	0.3671		0.0749	0.0986	-0.0474	-0.2159	0.0796		0.0152	-0.0046	0.0071	-0.006	0.0019		-0.0771	-0.123	-0.0199	-0.0124	-0.1748		0.1304	0.3544	0.8845	0.5684	0.0846				ILENRNGSLKPGSSHRKTKKPLPPTPEE	167	194		-0.2984	-0.1999	-0.2272	-0.1565	-0.1964	-0.2124	-0.2261		WIDGQYLC
	YLAEKHLFSTIPEL	345	358		-0.0289	0.1502	0.2527	0.2725	0.0326		0.0428	0.0807	0.0488	0.0388	-0.0022		0.1855	0.0816	0.0359	0.0688	0.1328		0.0054	-0.076	-0.0052	0.013	0.0936		0.0877	0.2384	0.7526	0.6819	0.2976				ILENRNGSLKPGSSHRKTKKPLPPTPEED	167	195		-0.367	-0.215	-0.4047	-0.2713	-0.2426	-0.2404	-0.1759		LCCSQTAKNAMG
	FSTIPEL	352	358		0.0256	0.0823	0.1244	0.2234	0.0555		0.049	0.0759	0.0367	0.0215	-0.0221		0.1249	0.0467	-0.0222	0.0068	0.0394		-0.0684	-0.0824	-0.092	-0.074	-0.0633		0.0275	0.1216	0.2672	0.3403	0.0731				HRKTKKPLPPTPEE	181	194		-0.0774	0.023	-0.1496	-0.055	-0.0081	-0.0907	-0.1172		LCCSQTAKNAMGCQ
	ISRLKYPVSKQNKNAPSTAGL	370	390		0.1352	0.3434	0.6644	-0.184	-0.1907		-0.1236	0.0462	-0.0421	-0.0482	0.0329		-0.0756	0.0167	0.3318	0.0988	0.1198		0.0371	-0.1914	0.1781	0.1578	0.0659		0.4762	0.8219	1.2603	0.1417	0.0693				DQILKKPLPPEPTAAPIST	195	213		0.0846	0.1232	-0.106	0.0934	0.083	-0.0542	-0.0114		CCSQTAKNAMGCQ
	ISRLKYPVSKQNKNAPSTAGLG	370	391		0.1329	0.3054	0.5911	-0.2059	-0.1643		-0.1045	0.0381	-0.1197	-0.0958	0.0325		-0.1993	0.236	0.313	0.0883	0.1121		0.012	-0.0494	0.1028	0.1762	0.0226		0.4694	0.8241	1.1864	0.1412	0.0065				QILKKPLPPEPTAAPIST	196	213		0.0701	0.1883	0.0769		0.0341	-0.0532	0.0126		SQTAKNAMG
	ISRLKYPVSKQNKNAPSTAGLGYGSW	370	395		0.1981	0.3582	0.4914	-0.1943	-0.0635		-0.1276	0.0149	-0.2129	-0.1177	-0.1151		-0.3935	0.2615	0.3663	0.1837	0.0484		-0.0189	-0.2248	0.063	0.1787	-0.188		0.5391	0.8519	1.232	0.1796	-0.1324				DQILKKPLPPEPTAAPISTTE	195	215		0.0893	0.2158	-0.0881	0.0974	0.0319	-0.0871	-0.0602		SQTAKNAMGC
	KQNKNAPSTAGLGYGSW	379	395		0.0862	-0.0359	-0.1283	-0.1512	-0.1436		-0.1141	0.0831	-0.1207	-0.0363	0.029		-0.2407	-0.0242	0.1628	0.1304	0.07		-0.0185	-0.1636	-0.0597	0.0855	-0.0548		0.0513	-0.0511	-0.1068	0.0313	-0.0562				ILKKPLPPEPTAAPIST	197	213		0.0374	0.1648	-0.092	-0.0006	0.0153	-0.082	-0.0035		SQTAKNAMGCQ
	EIDPKDLTF	396	404		-0.0312	-0.0543	-0.272	-0.1169	-0.0034		-0.0641	-0.2028	-0.6796	-0.8102	-0.4278		-0.1145	-0.1887	-0.6831	-0.7629	-0.6011		-0.0864	-0.2351	-0.5824	-0.4852	-0.3562		-0.0546	0.1219	0.0088	0.12	0.1432				QILKKPLPPEPTAAPISTTE	196	215		0.0568	0.1979	-0.0721	0.0953	0.041	-0.0542	-0.0363		SQTAKNAMGCQIL
	EIDPKDLTFL	396	405		-0.0347	-0.018	-0.255	-0.1208	0.0072		-0.1498	-0.2723	-0.6204	-0.7323	-0.4127		-0.0441	-0.3432	-0.6961	-0.7259	-0.5112		0.4166	0.2464	0.1013	0.2253	0.276		0.0956	-0.0217	0.0072	0.1119	0.02				ILKKPLPPEPTAAPISTTE	197	215		0.1001	0.2181	-0.0345	0.1515	0.1164	-0.1177	0.0802		TAKNAMGCQ
	FLKELGTGQF	404	413		-0.6633	-0.718	-0.2876	-0.1911	-0.1197		-2.2934	-2.6331	-1.9478	-1.1497	-0.3746		-2.3729	-2.6667	-1.6682	-0.8919	-0.4121		-1.2916	-1.4579	-0.751	-0.3392	-0.1598		-0.3258	-0.7008	-0.0327	-0.0131	-0.0742				YDYMPMNA	223	230		0.5352	0.4014	0.1334	0.0811	0.1054	0.2072	0.2515		ILENRNGSLKPGSS
	KELGTGQF	406	413		-0.5128	-0.6794	-0.2997	-0.1679	-0.1259		-2.2022	-2.484	-1.8944	-1.1305	-0.3287		-2.2127	-2.5918	-1.775	-0.8863	-0.3775		-1.0165	-1.1724	-0.7021	-0.2947	0.0078		-0.181	-0.4343	-0.061	0.03	0.0412				LYDYMPMNAND	222	232		0.4763	0.3505	0.1482	0.1854	0.2687	0.295	0.2852		ILENRNGSLKPGSSHRKTKKPLPPTPEE
	GVVKYGKWRGQY	414	425		-0.0859	-0.4292	-1.5751	-2.5428	-2.6062		-0.2195	-0.6854	-2.353	-3.6961	-4.2176		-0.0569	-0.5113	-2.2778	-3.6413	-4.0401		-0.1677	-0.5734	-2.0718	-3.335	-3.5038		-0.0251	-0.3671	-1.5111	-2.4983	-2.6956				YDYMPMNAND	223	232		0.4788	0.3773	0.1354	0.1054	0.2664	0.2137	0.2319		ILENRNGSLKPGSSHRKTKKPLPPTPEED
	GVVKYGKWRGQYDVA	414	428		-0.0051	-0.318	-1.2726	-2.2239	-2.3221		-0.0398	-0.4898	-2.1275	-3.445	-3.9087		-0.063	-0.5053	-2.0992	-3.1803	-3.6641		-0.1291	-0.4725	-1.8441	-2.8742	-3.1967		0.092	-0.3339	-1.3006	-1.9652	-2.3868				LQLRKGEE	233	240		0.0344	0.0472	0.1256	0.178	0.5517	0.9345	0.2756		ILENRNGSLKPGSSHRKTKKPLPPTPEEDQ
	VKYGKWRGQY	416	425		-0.074	-0.3367	-1.1979	-1.9203	-1.9898		-0.1564	-0.4796	-1.8235	-2.8482	-3.2067		-0.0132	-0.3467	-1.7617	-2.8094	-3.0792		-0.0814	-0.3863	-1.5755	-2.5404	-2.6896		0.0471	-0.2815	-1.1998	-2.0276	-2.1559				LQLRKGEEY	233	241		0.0052	-0.0002	0.0535	0.1048	0.5578	1.1343	0.4779		ILENRNGSLKPGSSHRKTKKPLPPTPEEDQILKKPLPPEPTAAPIST
	KYGKWRGQY	417	425		-0.0434	-0.363	-1.0948	-2.0231	-2.4287		-0.1123	-0.441	-1.6664	-3.152	-3.6065		-0.0548	-0.3357	-1.8033	-3.0319	-3.3836		-0.1153	-0.4039	-1.6612	-2.7755	-3.035		0.0064	-0.2589	-1.3237	-2.3306	-2.4037				LQLRKGEEYF	233	242		0.0418	0.0638	0.0706	0.1527	0.5627	1.1547	0.7607		ENRNGSLKPGSSHRKTKKPLPPTPEE
	IREGSMSE	432	439		0.0947	0.0926	0.0181	-0.0642	-0.047		-1.4809	-1.3915	-0.1672	-0.0299	0.0249		-1.478	-1.4915	-0.3322	0.039	0.0459		-0.2855	-0.0767	-0.009	0.0365	0.0519		0.542	0.1355	0.1098	0.119	0.0633				QLRKGEEY	234	241		0.0272	0.0837	0.0889	0.1959	0.5812	1.1124	0.4323		HRKTKKPLPPTPEE
	IREGSMSEDE	432	441		0.0577	-0.0307	0.0339	-0.0315	0.0577		-1.3585	-1.2854	-0.1951	-0.0799	-0.0357		-1.365	-1.2674	-0.2723	0.137	0.1992		-0.2326	-0.0768	-0.0241	0.06	0.129		0.5106	0.1072	0.1398	0.2019	0.3946				ILEESNLPWWRARDKNGQE	243	261		0.0396	-0.046	0.0526	0.145	0.4538	0.7327	0.3912		DQILKKPLPPEPTAAPISTTE
	AKVMMNLSHEKL	446	457		0.0723	0.1459	0.1395	0.1497	0.0741		0.0548	0.2058	0.1891	0.0811	0.0951		0.3814	0.302	0.1536	0.1659	0.1133		0.0446	-0.0771	0.0336	0.0901	0.0182		0.2522	-0.3101	-0.5867	0.3521	0.2709				ILEESNLPWWRARDKNGQEGYIPSN	243	267		0.2429	0.1681	0.1103	0.235	1.26	1.3594	0.6395		QILKKPLPPEPTAAPIST
	NLSHEKL	451	457		0.0908	0.0694	0.1447	0.268	0.0018		-0.0389	-0.0314	0.0349	0.1046	-0.0069		0.0043	0.0052	0.0114	0.02	0.0429		0.0395	0.0101	0.0216	0.0527	0.0294		0.2709	0.1036	0.1595	0.2958	0.1091				ILEESNLPWWRARDKNGQEGYIPSNY	243	268		0.1847	0.0962	0.0894	0.2081	1.2805	1.4668	0.746		QILKKPLPPEPTAAPISTTE
	GVCTKQRPIF	462	471		-0.0774	-0.0118	0.0419	0.0504	-0.104		0.0075	-0.0124	0.0227	-0.1212	-0.3487		-0.0397	-0.0666	-0.0203	-0.079	-0.2451		-0.0059	-0.0781	-0.0196	-0.0821	-0.1227		-0.1394	-0.0714	-0.0457	-0.0484	-0.1105				EESNLPWWRARDKNGQEGYIPSN	245	267		0.2434	0.1358	0.1846	0.3462	1.1322	1.3628	0.7173		ILKKPLPPEPTAAPIST
	TKQRPIF	465	471		-0.0206	-0.0096	-0.0558	-0.0836	-0.1142		-0.0328	-0.083	-0.0282	-0.1603	-0.3387		-0.0707	-0.0539	0.0339	-0.1295	-0.2849		-0.0604	-0.0815	0.0014	-0.0754	-0.1418		-0.0692	-0.0571	0.066	0.2328	0.3426				EESNLPWWRARDKNGQEGYIPSNY	245	268		0.2966	0.1373	0.1623	0.3972	1.4162	1.3567	0.7392		ILKKPLPPEPTAAPISTTE
	EYLESKQFL	510	518		0.0232	0.1298	-0.103	-0.1406	-0.1823		0.1137	0.15	-0.12	-0.1513	-0.4001		0.1674	-0.0209	-0.172	-0.2535	-0.4283		-0.0342	-0.0221	-0.1254	-0.1702	-0.2528		0.1188	0.5609	1.014	0.5476	0.1113				ESNLPWWRARDKNGQEGYIPSN	246	267		0.3303	0.2062	0.2057	0.3398	1.1681	1.31	0.8484		LKKPLPPEPTAAPIST
	YLESKQFL	511	518		0.0154	0.0992	-0.1625	-0.1718	-0.2081		0.0997	0.1351	-0.1911	-0.3459	-0.4958		0.1049	0.039	-0.1021	-0.244	-0.4742		-0.0576	-0.1268	-0.1232	-0.182	-0.2611		0.1311	0.594	1.1807	0.6072	0.148				AEDSIEM	272	278		0.1306	0.1258	0.0841	0.1295	-0.0412	-0.0494	-0.0656		TELKKVVAL
	YLESKQFLHRDLAARNCL	511	528		0.0588	0.2662	0.2742	-0.255	-0.2549		0.1427	-0.049	-0.7277	-0.6725	-0.8425		0.2084	-0.1958	-1.0063	-1.0212	-0.9176		-0.0517	-0.1697	-0.6311	-0.3914	-0.4265		0.1642	0.6687	1.0908	0.8562	0.7889				YEWYSKHMTRSQA	279	291		0.2364	0.0613	0.0926	0.386	0.0985	0.1962	-0.0725		LKKVVAL
	FLHRDLAARNCL	517	528		-0.025	0.1136	0.1252	-0.1672	-0.3404		-0.0497	-0.1538	-0.5598	-0.5137	-0.4575		0.0121	-0.3004	-0.9304	-0.8915	-0.5925		-0.0555	-0.1412	-0.557	-0.3402	-0.2097		0.0512	0.2782	0.3812	0.4328	0.8285				YEWYSKHMTRSQAEQL	279	294		0.2912	0.2367	0.296	0.5021	0.7821	0.9387	0.2336		LYDYMPMNA
	CLVNDQGVVKVSD	527	539		-0.6869	-0.6664	-0.5299	-0.4935	-0.6194		-0.3473	-0.2958	-0.0776	-0.3657	-0.6703		-0.36	-0.1339	-0.0734	-0.276	-0.548		-0.0781	-0.0696	0.0174	0.0411	0.0589		-0.6198	-0.2346	0.3312	0.4001	0.0023				YSKHMTRSQA	282	291		0.2144	0.0179	-0.0519	-0.2536	0.032	0.0988	0.085		LYDYMPMNAND
	CLVNDQGVVKVSDF	527	540		-0.6249	-0.7683	-1.0466	-1.1565	-1.2576		-0.3337	-0.414	-0.6454	-0.9824	-1.1704		-0.3271	-0.2811	-0.6601	-0.9678	-1.1908		-0.023	-0.1027	-0.1479	0.0812	0.047		-0.4688	0.006	0.4346	0.4395	0.0496				WYSKHMTRSQAEQL	281	294		0.1396	0.1527	0.1114	0.1455	0.4948	0.8707	0.1722		YDYMPMNA
	VNDQGVVKVSD	529	539		-0.7469	-0.6643	-0.5184	-0.5104	-0.689		-0.3301	-0.3037	-0.1024	-0.3663	-0.6978		-0.4203	-0.1938	-0.0444	-0.3243	-0.6424		-0.0241	-0.093	-0.0208	0.0456	0.032		-0.6379	-0.139	0.373	0.4351	0.0663				YSKHMTRSQAEQL	282	294		0.0892	0.0425	0.0093	0.0565	0.4648	0.8407	0.2377		YDYMPMNAND
	VNDQGVVKVSDFGL	529	542		-0.6119	-1.2478	-1.574	-1.0674	-1.0833		-0.3999	-0.8897	-1.2451	-1.5958	-1.5762		-0.2894	-0.8128	-1.5018	-1.5047	-1.5655		-0.1228	-0.4327	-0.3486	0.0003	-0.0084		-0.2614	0.3607	0.4317	0.4113	0.0397				YSKHMTRSQAEQLL	282	295		0.2041	0.2917	0.1506	0.1537	0.6963	1.2241	0.3652		LQLRKGEE
	VNDQGVVKVSDFGLS	529	543		-0.9115	-1.2707	-1.5928	-1.1409	-1.1492		-0.6677	-1.4094	-1.5726	-1.7509	-1.7095		-0.5546	-1.2941	-1.6723	-1.5798	-1.691		-0.1609	-0.4672	-0.3681	0.0547	0.0508		0.0569	0.4653	0.4909	0.525	0.0903				LLKQEGKEGGF	294	304		0.0106	0.0738	0.1897	0.2751	0.5852	0.4753	-0.0003		LQLRKGEEY
	VNDQGVVKVSDFGLSRY	529	545		-0.8604	-1.1822	-1.5295	-1.1344	-1.1167		-0.7682	-1.732	-2.269	-2.4974	-2.3538		-0.6598	-1.6375	-2.4416	-2.304	-2.3404		-0.1867	-0.6492	-0.4855	0.1166	-0.0032		0.7417	0.9102	0.5379	0.5101	0.0283				LKQEGKEGGF	295	304		0.0751	0.06	0.0952	0.2252	0.5097	0.2756	-0.0019		QLRKGEE
	VNDQGVVKVSDFGLSRYVL	529	547		-0.721	-0.9813	-1.3398	-1.1037	-0.8785		-1.0534	-2.6289	-3.3699	-3.2426	-2.7415		-0.8242	-2.6946	-3.635	-3.0872	-2.8134		-0.1724	-0.4663	-0.4023	0.2797	0.4692		2.0039	1.2657	0.4507	0.3327	0.0018				IVRDSSKAGKYTVSV	305	319			0.0259	0.1593	0.1368	0.7678	0.9071	0.0425		ILEESNLPWWRARDKNGQE
	VVKVSDF	534	540		-0.4617	-0.6373	-1.0667	-1.1509	-1.218		-0.4411	-0.5413	-0.7633	-1.1353	-1.3047		-0.3522	-0.2832	-0.6655	-1.0031	-1.349		-0.0093	-0.0124	-0.1248	0.0769	0.0462		-0.3061	0.1764	0.3848	0.4336	0.0877				IVRDSSKAGKYTVSVF	305	320		0.0211	0.036	0.092	0.266	0.8786	1.1981	0.1318		ILEESNLPWWRARDKNGQEGYIPSN
	VVKVSDFGL	534	542		-0.5464	-1.1572	-1.717	-1.1937	-1.2083		-0.55	-0.9816	-1.3752	-1.7268	-1.662		-0.4166	-0.8788	-1.5641	-1.7001	-1.7939		-0.1019	-0.4398	-0.354	0.0539	0.0376		-0.1768	0.476	0.4917	0.4977	0.1268				FAKSTGEPQGVIRH	320	333		-0.032	-0.0421	-0.083	0.033	0.1029	0.1166	-0.0297		ILEESNLPWWRARDKNGQEGYIPSNY
	FGLSRYVL	540	547		-0.2381	-0.2724	-0.2948	-0.1276	-0.0857		-0.7033	-1.8859	-2.4477	-1.965	-1.4559		-0.7063	-2.0703	-2.7353	-2.0821	-1.6338		-0.2044	-0.5711	-0.4408	0.038	-0.0474		2.4196	1.3212	-0.0616	-0.0071	-0.0636				AKSTGEPQGVIRH	321	333		0.0014	-0.0159	-0.0458	0.0397	0.168	0.1921	0.0305		EESNLPWWRARDKNGQEGYIPSN
	FGLSRYVLDD	540	549		-0.1751	-0.1626	-0.2603	-0.0695	-0.0114		-0.7947	-2.0085	-2.4354	-2.0863	-1.5762		-0.6877	-1.9051	-2.4986	-2.0192	-1.5153		-0.2004	-0.5226	-0.3991	-0.0174	0.0761		2.2494	1.3945	0.1497	0.0626	0.1499				FAKSTGEPQGVIRHYVV	320	336		-0.0263	0.0027	-0.0217	0.0737	0.347	0.6337	0.1456		EESNLPWWRARDKNGQEGYIPSNY
	GLSRYVL	541	547		-0.1816	-0.0183	-0.038	-0.0657	-0.0441		-0.7613	-1.8846	-2.0551	-1.5837	-1.1599		-0.7587	-1.9332	-2.1689	-1.5751	-1.2769		-0.2202	-0.4486	-0.2394	-0.0106	-0.0569		2.2468	1.0886	0.0352	0.0176	-0.018				FAKSTGEPQGVIRHYVVC	320	337		-0.1382	0.0001	0.0838	0.1372	0.464	0.7683	0.2462		PWWRARDKNGQEGYIPSNY
	GLSRYVLDD	541	549		-0.1568	-0.0253	0.027	0.0184	0.0322		-0.8624	-1.8609	-1.9424	-1.6256	-1.1587		-0.7497	-1.9759	-2.038	-1.5131	-1.1767		-0.1922	-0.4643	-0.1226	-0.0063	-0.0335		2.4302	1.108	0.1774	-0.0526	-0.1174				AKSTGEPQGVIRHYVV	321	336		0.0516	0.0517	0.0155	0.1042	0.4046	0.6275	0.2325		AEDSIEM
	GLSRYVLDDE	541	550		-0.125	0.0144	0.039	-0.065	0.0213		-0.9835	-2.1355	-2.1431	-1.6558	-1.1887		-1.0212	-1.9952	-1.9962	-1.4863	-1.0082		-0.204	-0.5208	-0.2152	-0.0231	0.0858		2.2219	0.9665	0.0622	-0.2159	0.3937				AKSTGEPQGVIRHYVVC	321	337		0	0.0048	-0.0215	0.0549	0.55	0.7833	0.2416		YEWYSKHMTRSQA
	SRYVLDD	543	549		0.0134	0	0.0125	-0.025	0.0803		-0.4524	-1.4291	-1.9078	-1.4506	-1.1018		-0.4827	-1.3391	-1.8465	-1.4594	-1.1873		-0.1225	-0.353	-0.2075	-0.0409	-0.0693		1.9104	0.9883	0.0235	-0.0018	-0.0073				FAKSTGEPQGVIRHYVVCSTPQSQ	320	343		0.0773	0.004	0.0481	0.1948	0.7246	0.7207	0.4268		YEWYSKHMTRSQAEQL
	EYTSSVGSKF	550	559		-0.0346	-0.082	-0.0634	-0.0882	-0.0895		-2.8327	-1.4131	-0.3304	0.0363	0.0624		-2.9782	-1.7517	-0.3474	0.0496	0.055		-0.133	-0.1001	0.1025	0.0351	0.1119		0.2004	0.0487	0.1211	0.1641	0.1025				FAKSTGEPQGVIRHYVVCSTPQSQY	320	344		0.2666	0.0661	0.0939	0.3469	0.9673	0.9282	0.243		WYSKHMTRSQA
	EYTSSVGSKFPVRWSPPEVL	550	569		0.0127	-0.0263	0.2907	-0.1867	-0.235		-3.2408	-2.0099	-1.5257	-2.5451	-2.129		-3.6984	-2.2089	-1.4435	-2.5536	-2.2633		0.0788	-0.1579	-0.3228	-0.206	0.1076		0.5102	1.2728	2.1842	0.4828	-0.0198				FAKSTGEPQGVIRHYVVCSTPQSQYY	320	345		0.0605	-0.0492	-0.1688	0.2615	1.327	1.1039	0.1781		WYSKHMTRSQAEQL
	YTSSVGSKF	551	559		-0.0293	-0.0671	-0.0451	-0.0979	-0.1041		-2.2311	-1.2411	-0.3761	-0.0803	-0.0975		-2.1124	-1.3025	-0.2286	-0.0084	0.0297		-0.1176	-0.1308	-0.0629	-0.0157	-0.012		0.1904	0.11	0.1164	0.1691	0.1002				AKSTGEPQGVIRHYVVCSTPQSQY	321	344		0.0569	0.1171	0.1815	0.3714	0.9152	0.9224	0.1769		YSKHMTRSQA
	TSSVGSKFPVRWSPPEVL	552	569		-0.068	0.0174	0.1999	-0.146	-0.1406		-2.6109	-1.8498	-1.5145	-2.5495	-2.1146		-2.4256	-1.8326	-1.4906	-2.4857	-2.3052		-0.1933	-0.2232	-0.4629	-0.3278	-0.1277		0.4643	1.1328	1.9864	0.5227	-0.1962				YVVCSTPQSQY	334	344		0.0889	0.0639	0.0997	0.1819	0.4821	0.4122	0.3671		YSKHMTRSQAEQL
	MYSKFSSKSDIWA	570	582		-0.1651	-0.0652	0.2143	-0.0748	-0.0615		0.0544	-0.0346	0.0632	0.0589	-0.0702		0.0781	-0.1375	-0.103	0.0683	0.0028		-0.1057	-0.0434	-0.2097	-0.0984	-0.1655		0.7548	0.6652	0.0703	0.1982	0.4647				YYLAEKHLFSTI	344	355		-0.0476	-0.0606	-0.0219	-0.0245	0.2324	0.0065	-0.1334		YSKHMTRSQAEQLL
	SSKSDIWA	575	582		-0.0347	-0.02	-0.0911	-0.0758	-0.1433		-0.0308	-0.0808	-0.1115	-0.0482	-0.1134		0.0129	-0.0061	-0.0499	0.0157	0.0169		0.0024	-0.0176	0.0108	-0.0034	-0.0013		0.1647	0.4995	0.1888	0.125	0.3259				YLAEKHLFSTI	345	355		-0.0327	-0.0706	-0.0726	-0.0142	0.146	-0.0152	-0.1364		LLKQEGKEGGF
	SSKSDIWAF	575	583		-0.024	-0.0478	-0.0656	-0.0498	-0.0998		0.0288	-0.0279	-0.0526	-0.0073	-0.0768		0.0776	0.0062	-0.0186	0.0094	0.0304		0.019	0.0182	-0.0231	-0.0209	-0.0434		0.155	0.3757	0.1129	0.0893	0.2765				YYLAEKHLFSTIPEL	344	358		-0.0437	-0.0378	0.0227	0.0414	0.3322	0.247	-0.0432		LKQEGKEGGF
	MWEIYSL	587	593		-0.067	-0.079	-0.0536	-0.048	-0.0543		0.0568	0.0128	0.0202	-0.0372	-0.0796		0.019	0.0048	-0.0064	-0.0265	-0.1266		0.0133	0.0119	-0.0033	-0.0439	-0.1053		0.0057	0.0052	-0.0024	0.0084	0.021				YLAEKHLFSTIPEL	345	358		0.0351	-0.0289	0.0181	0.1502	0.2527	0.2725	0.0326		IVRDSSKAGKY
	MWEIYSLGKMPYERF	587	601		-0.0369	0.2623	0.2919	0.1378	0.1376		-0.0357	-0.3196	-0.6381	-0.7644	-0.2949		-0.11	-0.464	-0.6361	-0.7269	-0.3878		-0.1842	-0.2181	-0.2505	-0.3566	-0.1116		0.124	0.3753	0.3308	0.1648	-0.0293				LAEKHLFSTIPEL	346	358		-0.0751	-0.0195	0.0097	0.0709	0.2842	0.3202	0.0324		IVRDSSKAGKYTVSVF
	WEIYSLGKMPYERF	588	601		0.026	0.2457	0.2329	0.118	0.0119		-0.075	-0.3667	-0.6364	-0.814	-0.3195		-0.1079	-0.4081	-0.6686	-0.7117	-0.4727		-0.1003	-0.2223	-0.2395	-0.4303	-0.2538		0.1465	0.3896	0.2839	0.1081	-0.1249				FSTIPEL	352	358		0.0162	0.0256	0.0257	0.0823	0.1244	0.2234	0.0555		FAKSTGEPQGVIRH
	WEIYSLGKMPYERFTNSE	588	605		0.0999	0.2671	0.2936	0.1506	0.2074		-0.1838	-0.3884	-0.6088	-0.7855	-0.3601		-0.1621	-0.4682	-0.7084	-0.5637	-0.4149		0.2091	0.3358	0.2419	0.2555	0.1799		0.5149	0.4954	0.2584	0.2398	-0.0054				INYHQHNSAG	359	368		-0.0463	-0.0174	-0.047	-0.0114	0.2173	0.075	-0.0711		FAKSTGEPQGVIRHYVV
	IYSLGKMPYERF	590	601		0.0623	0.2416	0.2319	0.0967	0.0512		-0.0641	-0.4179	-0.5365	-0.8186	-0.3237		-0.1679	-0.4037	-0.6606	-0.7689	-0.4		-0.1008	-0.242	-0.3126	-0.4892	-0.1646		0.1473	0.4709	0.2885	0.215	-0.0417				INYHQHNSAGL	359	369		-0.0168	0.0557	0.01	0.0761	0.3394	0.1362	-0.0331		FAKSTGEPQGVIRHYVVC
	GKMPYERF	594	601		-0.0221	0.2415	-0.0023	-0.0231	0.0447		-0.1287	-0.3268	-0.2868	0.0401	-0.0058		-0.181	-0.3902	-0.3505	-0.0466	-0.01		-0.1074	-0.1832	-0.035	-0.0567	-0.0363		0.1933	0.4538	0.0293	-0.0093	-0.0014				HQHNSAGL	362	369		-0.0169	0.0151	-0.063	-0.0025	-0.0362	-0.0422	-0.0461		FAKSTGEPQGVIRHYVVCSTPQSQY
	GKMPYERFTNSE	594	605		0.0605	0.2763	0.0215	-0.048	-0.0379		-0.2681	-0.3385	-0.3014	-0.0194	-0.0093		-0.478	-0.4406	-0.4125	-0.0524	0.0231		-0.2418	-0.2969	-0.0781	0.0084	-0.0092		0.5485	0.5687	0.0435	0.0553	0.0855				ISRLKYPVSKQNKNAPSTAGL	370	390		0.1445	0.1352	0.0615	0.3434	0.6644	-0.184	-0.1907		FAKSTGEPQGVIRHYVVCSTPQSQYY
	GKMPYERFTNSETAE	594	608		0.1496	0.6458	0.0533	-0.109	-0.038		-0.6186	-1.1247	-1.3572	-0.0689	-0.0811		-0.4131	-1.0372	-1.4619	-0.0413	0.0023		-0.2766	-0.4685	-0.1705	-0.0123	-0.0619		1.0911	1.5047	0.1893	0.1335	0.0669				ISRLKYPVSKQNKNAPSTAGLG	370	391			0.1329	0.0688	0.3054	0.5911	-0.2059	-0.1643		AKSTGEPQGVIRH
	TAEHIAQGLRLPRPHL	606	621		0.0657	0.3964	0.2991	0.049	-0.0369		-0.0237	-0.323	-0.8967	-0.7233	-0.4789		-0.0665	-0.3312	-0.8509	-0.5793	-0.474		-0.1249	-0.2314	-0.225	-0.0031	-0.1118		0.2855	1.2584	0.5749	0.4987	0.1287				ISRLKYPVSKQNKNAPSTAGLGY	370	392		0.3046	0.2588	0.0622	0.4012	0.6733	-0.1639	-0.1022		AKSTGEPQGVIRHYVV
	HIAQGLRLPRPHL	609	621		0.0379	0.233	0.0607	-0.0192	0.0188		-0.0604	-0.1737	-0.1653	-0.1719	-0.324		-0.1799	-0.1244	-0.1732	-0.1407	-0.2199		-0.1132	-0.1979	-0.1133	-0.0241	-0.0168		0.1421	0.5942	0.2894	0.4929	0.2007				ISRLKYPVSKQNKNAPSTAGLGYGSW	370	395		0.2923	0.1981	0.0778	0.3582	0.4914	-0.1943	-0.0635		AKSTGEPQGVIRHYVVC
	HIAQGLRLPRPHLAS	609	623		0.0088	0.1871	0.0727	-0.0163	-0.0006		-0.0711	-0.1649	-0.2116	-0.2614	-0.343		-0.0845	-0.1351	-0.097	-0.1008	-0.0913		-0.0787	-0.2375	-0.0598	0.0916	0.0413		0.198	0.7059	0.3272	0.5732	0.3056				KQNKNAPSTAGLGYGSW	379	395		0.116	0.0862	-0.0203	-0.0359	-0.1283	-0.1512	-0.1436		AKSTGEPQGVIRHYVVCSTPQSQY
	LRLPRPHLAS	614	623		-0.036	-0.0353	-0.016	0.0185	0.0119		0.1167	-0.006	-0.0516	-0.2343	-0.2923		-0.0549	-0.0023	-0.0277	-0.1473	-0.1988		-0.0344	-0.0955	-0.035	-0.0758	-0.0827		-0.0289	0.04	0.1426	0.4802	0.2364				EIDPKDLTF	396	404		-0.0406	-0.0312	-0.0548	-0.0543	-0.272	-0.1169	-0.0034		PQGVIRHYVV
	YSCWHEKA	631	638		-0.0761	-0.1115	-0.0696	-0.1279	-0.0977		0.0069	0.044	0.0257	0.0002	0.0185		-0.0615	0.0169	0.089	0.0254	0.0356		0.0039	-0.066	0.0171	-0.066	-0.0087		-0.0466	0.0222	-0.0043	-0.0656	-0.1122				EIDPKDLTFL	396	405		-0.0795	-0.0347	-0.0273	-0.018	-0.255	-0.1208	0.0072		YVVCSTPQSQY
	YSCWHEKADERPSF	631	644		-0.0266	0.0366	-0.0815	-0.0765	-0.0419		-0.1379	-0.1273	0.0111	-0.0589	-0.0167		-0.0098	-0.1135	0.0381	0.0304	0.0926		-0.0512	-0.1071	-0.02	-0.0199	-0.0243		0.0817	0.0927	0.1717	0.0717	-0.0298				DPKDLTF	398	404		-0.0873	-0.0442	-0.0951	-0.0598	-0.2444	-0.129	-0.0494		YYLAEKHLFSTI
	SCWHEKADERPSF	632	644		-0.0194	0.0181	-0.0706	-0.0629	-0.0355		-0.0137	-0.0665	0.0273	0.0275	-0.0094		-0.0057	-0.104	0.0828	0.119	0.1531		-0.0459	-0.1114	0.0024	0.0279	-0.0015		0.1308	0.1589	0.2144	0.1853	0.0411				FLKELGTGQF	404	413		-0.8034	-0.6633	-0.8381	-0.718	-0.2876	-0.1911	-0.1197		YLAEKHL
	CWHEKADERPSF	633	644		0.0056	0.0462	-0.0219	-0.0032	0.0675		-0.0401	-0.0653	0.0314	0.0119	0.0508		-0.044	-0.1113	0.0621	0.0693	0.1171		0.027	-0.0509	-0.0077	0.0213	0.0414		0.0652	0.1698	0.1471	0.0772	0.0041				KELGTGQF	406	413		-0.6243	-0.5128	-0.6931	-0.6794	-0.2997	-0.1679	-0.1259		YLAEKHLFSTI
	HEKADERPSF	635	644		-0.0158	-0.0026	-0.0289	-0.0156	0.0362		-0.0435	-0.0928	0.03	-0.0402	0.0598		0.0303	-0.1123	0.0397	0.0471	0.0705		0.0568	0.0065	0.052	0.0512	0.0793		0.1053	0.2056	0.2062	0.1077	-0.0008				LKELGTGQFGVVKYGKWRGQY	405	425		-0.8612	-0.8774	-0.9498	-1.1064	-1.4115	-2.4481	-2.3218		YLAEKHLFSTIPEL
																																					GVVKYGKWRGQY	414	425		-0.0106	-0.0859	-0.2539	-0.4292	-1.5751	-2.5428	-2.6062		YLAEKHLFSTIPELINY
																																					VKYGKWRGQY	416	425		-0.0448	-0.074	-0.2113	-0.3367	-1.1979	-1.9203	-1.9898		FSTIPEL
																																					GVVKYGKWRGQYDVA	414	428		0.0444	-0.0051	-0.156	-0.318	-1.2726	-2.2239	-2.3221		NYHQHNSAGL
																																					KYGKWRGQY	417	425		0.0052	-0.0434	-0.2044	-0.363	-1.0948	-2.0231	-2.4287		HQHNSAGL
																																					IREGSMSE	432	439		0.0845	0.0947	-0.0122	0.0926	0.0181	-0.0642	-0.047		ISRLKYPVSKQNKNAPSTAGL
																																					IREGSMSEDE	432	441		0.0552	0.0577	-0.0879	-0.0307	0.0339	-0.0315	0.0577		ISRLKYPVSKQNKNAPSTAGLG
																																					IREGSMSEDEF	432	442		0.0181	0.0275	0.0385	0.1675	0.2056	-0.0158	0.0223		ISRLKYPVSKQNKNAPSTAGLGY
																																					AKVMMNL	446	452		0.0342	-0.0018	0.1123	0.143	-0.0382	-0.0974	0.1255		ISRLKYPVSKQNKNAPSTAGLGYGSW
																																					IEEAKVMMNLSHEKL	443	457		0.2081	0.1307	0.197	0.2255	0.2636	0.3433	0.0942		KQNKNAPSTAGLGYGSW
																																					AKVMMNLSHEKL	446	457		0.1206	0.0723	0.1037	0.1459	0.1395	0.1497	0.0741		EIDPKDLTF
																																					KVMMNLSHEKL	447	457		0.1373	0.0996	0.1091	0.1814	0.0854	0.1736	0.0024		EIDPKDLTFL
																																					MNLSHEKL	450	457		0.1243	0.1116	0.0604	0.0808	0.1565	0.3347	0.0957		DPKDLTF
																																					NLSHEKL	451	457		0.1295	0.0908	0.0845	0.0694	0.1447	0.268	0.0018		FLKELGTGQF
																																					YGVCTKQRPIF	461	471		-0.0427	-0.0218	-0.0203	0.0135	0.0667	0.0776	-0.0576		KELGTGQF
																																					GVCTKQRPIF	462	471		-0.1119	-0.0774	-0.0216	-0.0118	0.0419	0.0504	-0.104		ELGTGQF
																																					TKQRPIF	465	471		-0.017	-0.0206	-0.0261	-0.0096	-0.0558	-0.0836	-0.1142		GVVKYGKWRGQY
																																					REMRHRFQTQQL	487	498		-0.2423	-0.2302	0.042	-0.1392	-0.0792	-0.1034	-0.0654		GVVKYGKWRGQYDVA
																																					CKDVCEA	502	508		-0.0145	0.0048	0.0108	-0.001	-0.0033	-0.0047	0.0057		VKYGKWRGQY
																																					CKDVCEAM	502	509		-0.0198	0.002	-0.0457	-0.0042	0.0231	-0.0067	-0.0063		KYGKWRGQY
																																					MEYLESKQFL	509	518		0.0379	-0.0292	0.152	0.0559	-0.026	0.1179	-0.0061		IREGSMSE
																																					EYLESKQFL	510	518		0.0355	0.0232	0.1335	0.1298	-0.103	-0.1406	-0.1823		IREGSMSEDE
																																					YLESKQFL	511	518		0.0124	0.0154	0.1054	0.0992	-0.1625	-0.1718	-0.2081		IREGSMSEDEF
																																					YLESKQFLHRDLAARNCL	511	528		0.1265	0.0588	0.2146	0.2662	0.2742	-0.255	-0.2549		IEEAKVMMNLSHEKL
																																					FLHRDLAARNCL	517	528		-0.0415	-0.025	0.093	0.1136	0.1252	-0.1672	-0.3404		AKVMMNLSHEKL
																																					HRDLAARN	519	526		0.0353	-0.1904	-0.0058	0.0897	0.0672	-0.1122	-0.1706		KVMMNLSHEKL
																																					HRDLAARNCL	519	528		-0.1559	-0.1968	-0.0727	-0.0325	0.0162	-0.2755	-0.3822		MMNLSHEKL
																																					RNCLVNDQGVVKVSDF	525	540		-0.5629	-0.6032	-0.7088	-0.7733	-1.0109	-1.1457	-1.3161		MNLSHEKL
																																					CLVNDQGVVKVSD	527	539		-0.5959	-0.6869	-0.8058	-0.6664	-0.5299	-0.4935	-0.6194		NLSHEKL
																																					CLVNDQGVVKVSDF	527	540		-0.5918	-0.6249	-0.7819	-0.7683	-1.0466	-1.1565	-1.2576		YGVCTKQRPIF
																																					VNDQGVVKVSD	529	539		-0.6806	-0.7469	-0.7797	-0.6643	-0.5184	-0.5104	-0.689		GVCTKQRPIF
																																					VNDQGVVKVSDF	529	540		-0.6228	-0.67	-0.7982	-0.8091	-1.1083	-1.1026	-1.2861		TKQRPIF
																																					VNDQGVVKVSDFGL	529	542		-0.4521	-0.6119	-1.0671	-1.2478	-1.574	-1.0674	-1.0833		EYMANGCL
																																					VNDQGVVKVSDFGLS	529	543		-0.6333	-0.9115	-1.1766	-1.2707	-1.5928	-1.1409	-1.1492		YMANGCL
																																					VNDQGVVKVSDFGLSRY	529	545		-0.7168	-0.8604	-1.1496	-1.1822	-1.5295	-1.1344	-1.1167		LREMRHRFQTQQL
																																					VVKVSDF	534	540		-0.4733	-0.4617	-0.6247	-0.6373	-1.0667	-1.1509	-1.218		MCKDVCEA
																																					VNDQGVVKVSDFGLSRYVL	529	547		-0.547	-0.721	-0.8953	-0.9813	-1.3398	-1.1037	-0.8785		CKDVCEA
																																					VVKVSDFGL	534	542		-0.477	-0.5464	-0.9258	-1.1572	-1.717	-1.1937	-1.2083		MEYLESKQFL
																																					VNDQGVVKVSDFGLSRYVLDD	529	549		-0.4595	-0.5769	-1.0674	-0.9154	-1.0837	-0.9918	-1.1159		EYLESKQFL
																																					FGLSRYVL	540	547		-0.1471	-0.2381	-0.243	-0.2724	-0.2948	-0.1276	-0.0857		YLESKQFL
																																					GLSRYVL	541	547		-0.0896	-0.1816	-0.1109	-0.0183	-0.038	-0.0657	-0.0441		YLESKQFLHRDLAARNCL
																																					FGLSRYVLDD	540	549		-0.1161	-0.1751	-0.2092	-0.1626	-0.2603	-0.0695	-0.0114		FLHRDLAA
																																					FGLSRYVLDDE	540	550		-0.1404	-0.1841	-0.3398	-0.2187	-0.0993	-0.0921	-0.0378		FLHRDLAARNCL
																																					GLSRYVLDD	541	549		-0.3463	-0.1568	-0.1797	-0.0253	0.027	0.0184	0.0322		RNCLVNDQGVVKVSDF
																																					GLSRYVLDDE	541	550		-0.1279	-0.125	-0.1642	0.0144	0.039	-0.065	0.0213		CLVNDQGVVKVSD
																																					SRYVLDD	543	549		0.059	0.0134	-0.0004	0	0.0125	-0.025	0.0803		CLVNDQGVVKVSDF
																																					EYTSSVGSKF	550	559		-0.0334	-0.0346	-0.1426	-0.082	-0.0634	-0.0882	-0.0895		VNDQGVVKVSD
																																					YTSSVGSKF	551	559		-0.0558	-0.0293	-0.1147	-0.0671	-0.0451	-0.0979	-0.1041		VNDQGVVKVSDFGL
																																					EYTSSVGSKFPVRWSPPEVL	550	569		0.0242	0.0127	-0.0596	-0.0263	0.2907	-0.1867	-0.235		VNDQGVVKVSDFGLS
																																					YTSSVGSKFPVRWSPPEVL	551	569		-0.1662	-0.0267	0.0378	0.0387	0.2613	-0.2172	-0.1699		VNDQGVVKVSDFGLSRY
																																					TSSVGSKFPVRWSPPEVL	552	569		0.0122	-0.068	-0.1904	0.0174	0.1999	-0.146	-0.1406		VNDQGVVKVSDFGLSRYVL
																																					PVRWSPPEVL	560	569		0.0526	0.0336	0.0358	0.112	0.3563	-0.0037	-0.0422		VNDQGVVKVSDFGLSRYVLDD
																																					MYSKFSSKSDIWA	570	582		-0.0747	-0.1651	-0.1306	-0.0652	0.2143	-0.0748	-0.0615		VNDQGVVKVSDFGLSRYVLDDE
																																					YSKFSSKSDIWA	571	582		-0.1169	-0.1171	-0.0998	-0.1118	-0.0936	-0.1442	-0.1258		VVKVSDF
																																					SSKSDIWA	575	582		-0.0017	-0.0347	-0.0147	-0.02	-0.0911	-0.0758	-0.1433		VVKVSDFGL
																																					SSKSDIWAF	575	583		-0.0401	-0.024	-0.0266	-0.0478	-0.0656	-0.0498	-0.0998		FGLSRYVL
																																					MWEIYSL	587	593		-0.0602	-0.067	-0.0687	-0.079	-0.0536	-0.048	-0.0543		FGLSRYVLDD
																																					WEIYSLGKM	588	596		0.0122	-0.0597	0.0216	0.0189	0.2725	0.1639	0.1257		GLSRYVL
																																					WEIYSLGKMPYE	588	599		0.0604	-0.0731	0.0879	0.0871	0.256	0.1643	0.153		GLSRYVLDD
																																					MWEIYSLGKMPYERF	587	601		0.0836	-0.0369	0.1692	0.2623	0.2919	0.1378	0.1376		GLSRYVLDDE
																																					WEIYSLGKMPYERF	588	601		0.0852	0.026	0.2123	0.2457	0.2329	0.118	0.0119		SRYVLDD
																																					IYSLGKMPYERF	590	601		0.1335	0.0623	0.1574	0.2416	0.2319	0.0967	0.0512		SRYVLDDE
																																					MWEIYSLGKMPYERFTNSE	587	605		0.3625	0.1934	0.4139	0.5073	0.4865	0.4229	0.5863		EYTSSVGSKF
																																					WEIYSLGKMPYERFTNSE	588	605		0.2089	0.0999	0.305	0.2671	0.2936	0.1506	0.2074		EYTSSVGSKFPVRWSPPEVL
																																					IYSLGKMPYERFTNSE	590	605		0.2473	0.0504	0.3169	0.2626	0.2884	0.0555	0.0316		YTSSVGSKF
																																					GKMPYERF	594	601		0.055	-0.0221	0.143	0.2415	-0.0023	-0.0231	0.0447		TSSVGSKFPVRWSPPEVL
																																					WEIYSLGKMPYERFTNSETAE	588	608		0.2165	0.0616	0.6946	0.5884	0.578	0.2533	0.4639		SKFPVRWSPPEVL
																																					YSLGKMPYERFTNSE	591	605		-0.0205	0.0375	-0.0494	0.0842	-0.04	-0.0913	-0.0031		MYSKFSSKSDIWA
																																					IYSLGKMPYERFTNSETAE	590	608		0.2552	0.1826	0.5331	0.7152	0.3177	0.1397	0.0733		YSKFSSKSDIWA
																																					GKMPYERFTNSE	594	605		0.1403	0.0605	0.2578	0.2763	0.0215	-0.048	-0.0379		SSKSDIWA
																																					GKMPYERFTNSETAE	594	608		0.1988	0.1496	0.5244	0.6458	0.0533	-0.109	-0.038		SSKSDIWAF
																																					RFTNSETAE	600	608		0.1129	0.1807	0.382	0.4342	0.0426	-0.0315	0.0173		MWEIYSL
																																					TNSETAE	602	608		0.1555	0.1471	0.3925	0.504	0.0659	0.0056	0.036		MWEIYSLGKMPYERF
																																					TAEHIAQGLRLPRPHL	606	621		0.0646	0.0657	0.2484	0.3964	0.2991	0.049	-0.0369		MWEIYSLGKMPYERFTNSE
																																					HIAQGLRLPRPHL	609	621		0.0792	0.0379	0.0918	0.233	0.0607	-0.0192	0.0188		WEIYSLGKM
																																					HIAQGLRLPRPHLAS	609	623		0.03	0.0088	0.1101	0.1871	0.0727	-0.0163	-0.0006		WEIYSLGKMPYE
																																					LRLPRPHLAS	614	623		-0.0262	-0.036	-0.0929	-0.0353	-0.016	0.0185	0.0119		WEIYSLGKMPYERF
																																					YSCWHEKA	631	638		-0.0793	-0.0761	-0.0676	-0.1115	-0.0696	-0.1279	-0.0977		WEIYSLGKMPYERFTNS
																																					YSCWHEKADERPSF	631	644		-0.0228	-0.0266	-0.0229	0.0366	-0.0815	-0.0765	-0.0419		WEIYSLGKMPYERFTNSE
																																					SCWHEKADERPSF	632	644		-0.041	-0.0194	0.028	0.0181	-0.0706	-0.0629	-0.0355		WEIYSLGKMPYERFTNSETAE
																																					CWHEKADERPSF	633	644		-0.0034	0.0056	0.0084	0.0462	-0.0219	-0.0032	0.0675		IYSLGKMPYERF
																																					WHEKADERPSF	634	644		0.022	0.0159	0.0879	0.0447	-0.0105	0.0022	0.1413		IYSLGKMPYERFTNS
																																					HEKADERPSF	635	644		-0.0079	-0.0158	0.0225	-0.0026	-0.0289	-0.0156	0.0362		IYSLGKMPYERFTNSE
																																					KILLSNILD	645	653		0.0063	-0.0073	0.0063	0.0085	0.0253	0.047	0.0453		IYSLGKMPYERFTNSETAE
																																					DVMDEESHHHHHH	653	665		-0.1077	-0.0424	-0.0282	-0.0647	-0.046	-0.015	-0.0155		YSLGKMPYERFTNSE
																																					VMDEESHHHHHH	654	665		0.0093	-0.0038	-0.0129	0.349	-0.0077	-0.0622	-0.1235		YSLGKMPYERFTNSETAE
																																																	SLGKMPYERF
																																																	GKMPYERF
																																																	GKMPYERFTNSE
																																																	GKMPYERFTNSETAE
																																																	RFTNSETAE
																																																	TAEHIAQG
																																																	TAEHIAQGLRLPRPHL
																																																	HIAQGLRLPRPHL
																																																	HIAQGLRLPRPHLAS
																																																	LRLPRPHL
																																																	LRLPRPHLAS
																																																	LRLPRPHLASE
																																																	YSCWHEKA
																																																	YSCWHEKADERPSF
																																																	SCWHEKADERPSF
																																																	CWHEKADERPSF
																																																	WHEKADERPSF
																																																	HEKADERPSF
																																																	KILLSNIL
																																																	KILLSNILD
																																																	KILLSNILDV
																																																	DVMDEESHHHHHH
[truncated: 40 more columns]

## Sheet: Figure 7
Relative Difference in Deuterium Incorporation All peptides												Relative Difference in Deuterium Incorporation peptides included in Figure 4
				T316A-wt												T316A-wt										T316A-wt
Sequence	Start	End		10 sec	1 min	5 min	10 min	1 hour	4 hours			Sequence	Start	End		10 sec	1 min	10min	1 hour	4 hours		Sequence	Start	End		10 sec	1 min	10min	1 hour	4 hours				Sequence	Start	End	length
AAVILES	2	8		0.0099	0.0124	-0.0298	0.022	0.0739	0.108			LKRSQQKKKTSPLNF	11	25		-0.1264	-0.0791	0.1699	0.1746	0.0471		LKRSQQKKKTSPLNF	11	25		-0.1264	-0.0791	0.1699	0.1746	0.0471				AAVILES	2	8	7
IFLKRSQQKKKTSPLN	9	24		-0.0372	0.271	0.2734	0.0988	0.133	0.25			LTVHKLSY	32	39		0.0235	0.0377	0.0845	0.1023	0.1033		LTVHKLSY	32	39		0.0235	0.0377	0.0845	0.1023	0.1033				IFLKRSQQKKKTSPLN	9	24	16
IFLKRSQQKKKTSPLNF	9	25		-0.0261	0.1431	-0.0663	0.1227	0.0705	0.0351			TVHKLSY	33	39		-0.0565	0.0041	0.027	-0.0073	0.0621		TVHKLSY	33	39		-0.0565	0.0041	0.027	-0.0073	0.0621				IFLKRSQQKKKTSPLNF	9	25	17
LKRSQQKKKTSPLNF	11	25		-0.1264	-0.0791	0.0888	0.1699	0.1746	0.0471			FERGRRGSKKGSIDVE	44	59		-0.1877	0.0023	0.0208	-0.0294	-0.0567		FERGRRGSKKGSIDVE	44	59		-0.1877	0.0023	0.0208	-0.0294	-0.0567				IFLKRSQQKKKTSPLNFKKRLFL	9	31	23
IFLKRSQQKKKTSPLNFKKRLFL	9	31		0.0849	0.1663	0.1558	0.1195	0.0896	0.0706			VEKITCVE	58	65		0.0162	0.0396	0.06	0.0484	0.109		VEKITCVE	58	65		0.0162	0.0396	0.06	0.0484	0.109				LKRSQQKKKTSPLNF	11	25	15
LKRSQQKKKTSPLNFKKRLFL	11	31		0.0708	0.067	0.0784	0.1304	0.1169	0.2217			VETVIPEKNPPPERQIPRRGEE	64	85		-0.2664	0.0668	0.1102	0.0412	0.0982		VETVIPEKNPPPERQIPRRGEE	64	85		-0.2664	0.0668	0.1102	0.0412	0.0982				LKRSQQKKKTSPLNFKKRLFL	11	31	21
FKKRLFL	25	31		-0.0685	0.092	-0.1168	-0.0241	0.0059	0.1387			VETVIPEKNPPPERQIPRRGEESSE	64	88		-0.0143	0.0159	0.1203	0.004	0.193		VETVIPEKNPPPERQIPRRGEESSE	64	88		-0.0143	0.0159	0.1203	0.004	0.193				FKKRLFL	25	31	7
LTVHKLSY	32	39		0.0235	0.0377	0.0423	0.0845	0.1023	0.1033			VETVIPEKNPPPERQIPRRGEESSEM	64	89		-0.1937	0.1074	0.0724	0.179	0.1824		VETVIPEKNPPPERQIPRRGEESSEM	64	89		-0.1937	0.1074	0.0724	0.179	0.1824				LTVHKLSY	32	39	8
TVHKLSY	33	39		-0.0565	0.0041	-0.0515	0.027	-0.0073	0.0621			TVIPEKNPPPERQIPRRGEE	66	85		-0.2623	-0.0855	0.0636	0.0472	-0.079		TVIPEKNPPPERQIPRRGEE	66	85		-0.2623	-0.0855	0.0636	0.0472	-0.079				LTVHKLSYYE	32	41	10
LTVHKLSYYE	32	41		-0.0244	0.0067	-0.0101	-0.0255	0.067	0.0247			TVIPEKNPPPERQIPRRGEESSE	66	88		-0.0055	0.0339	0.0997	0.1039	0.2123		TVIPEKNPPPERQIPRRGEESSE	66	88		-0.0055	0.0339	0.0997	0.1039	0.2123				LTVHKLSYYEYD	32	43	12
LTVHKLSYYEYD	32	43		-0.0899	-0.2739	-0.2245	-0.2313	-0.3191	0.4835			TVIPEKNPPPERQIPRRGEESSEM	66	89		-0.0792	0.113	0.1585	0.1902	0.2094		TVIPEKNPPPERQIPRRGEESSEM	66	89		-0.0792	0.113	0.1585	0.1902	0.2094				TVHKLSY	33	39	7
FERGRRGSKKGSID	44	57		-0.175	0.124	-0.0564	-0.1003	0.1058	-0.0467			ISIIERFPYPFQ	92	103		-0.079	0.0394	-0.0355	0.029	-0.0594		ISIIERFPYPFQ	92	103		-0.079	0.0394	-0.0355	0.029	-0.0594				YEYDFERGRRGSKKGSIDVEKITC	40	63	24
DFERGRRGSKKGSIDVE	43	59		-0.1397	0.0279	-0.0129	0.0229	0.1465	-0.0133			VVYDEGPL	104	111		-0.0553	0.0355	0.0066	-0.0091	-0.0107		VVYDEGPL	104	111		-0.0553	0.0355	0.0066	-0.0091	-0.0107				DFERGRRGSKKGSIDVE	43	59	17
YEYDFERGRRGSKKGSIDVEKITC	40	63		-0.209	-0.0313	-0.3163	0.2218	0.1434	0.2108			VVYDEGPLYVFSPTEE	104	119		-0.1225	0.0011	0.0552	0.0353	0.0414		VVYDEGPLYVFSPTEE	104	119		-0.1225	0.0011	0.0552	0.0353	0.0414				FERGRRGSKKGSID	44	57	14
FERGRRGSKKGSIDVE	44	59		-0.1877	0.0023	-0.0762	0.0208	-0.0294	-0.0567			VIRYNSDL	131	138		-0.0436	0.078	-0.0968	0.1157	0.0951		VIRYNSDL	131	138		-0.0436	0.078	-0.0968	0.1157	0.0951				FERGRRGSKKGSIDVE	44	59	16
FERGRRGSKKGSIDVEKITC	44	63		-0.1334	0.0552	-0.0455	0.0417	0.0665	0.0341			VQKYHPCF	139	146		0.0064	0.0361	0.0457	-0.0006	0.0624		VQKYHPCF	139	146		0.0064	0.0361	0.0457	-0.0006	0.0624				FERGRRGSKKGSIDVEKITC	44	63	20
FERGRRGSKKGSIDVEKITCVE	44	65		-0.0211	0.1514	0.1785		0.349				QKYHPCF	140	146		-0.0115	0.0019	0.018	0.0311	0.0387		QKYHPCF	140	146		-0.0115	0.0019	0.018	0.0311	0.0387				FERGRRGSKKGSIDVEKITCVE	44	65	22
VEKITCVE	58	65		0.0162	0.0396	0.0073	0.06	0.0484	0.109			LCCSQTAKNAMGCQ	153	166		-0.0009	0.0917	0.1875	0.159	0.2852		LCCSQTAKNAMGCQ	153	166		-0.0009	0.0917	0.1875	0.159	0.2852				VEKITCVE	58	65	8
VETVIPEKNPPPERQIPRRGEE	64	85		-0.2664	0.0668	0.1629	0.1102	0.0412	0.0982			CCSQTAKNAMGCQ	154	166		-0.1067	0.0695	0.0687	-0.003	0.0986		CCSQTAKNAMGCQ	154	166		-0.1067	0.0695	0.0687	-0.003	0.0986				VETVIPEKNPPPERQIPRRGEE	64	85	22
VETVIPEKNPPPERQIPRRGEES	64	86		-0.1201	0.1009	0.1477	0.0617	0.1638	0.168			ILENRNGSLKPGSS	167	180		0.0512	0.1485	0.211	0.1599	0.1091		ILENRNGSLKPGSS	167	180		0.0512	0.1485	0.211	0.1599	0.1091				VETVIPEKNPPPERQIPRRGEES	64	86	23
TVIPEKNPPPERQIPRRGEE	66	85		-0.2623	-0.0855	0.1409	0.0636	0.0472	-0.079			ILENRNGSLKPGSSHRKTKKPLPPTPEE	167	194		-0.1728	-0.0086	0.1645	0.0053	-0.0181		ILENRNGSLKPGSSHRKTKKPLPPTPEE	167	194		-0.1728	-0.0086	0.1645	0.0053	-0.0181				VETVIPEKNPPPERQIPRRGEESSE	64	88	25
VETVIPEKNPPPERQIPRRGEESSE	64	88		-0.0143	0.0159	-0.028	0.1203	0.004	0.193			DQILKKPLPPEPTAAPISTTE	195	215		-0.0075	0.1013	0.1161	0.1011	-0.0324		DQILKKPLPPEPTAAPISTTE	195	215		-0.0075	0.1013	0.1161	0.1011	-0.0324				VETVIPEKNPPPERQIPRRGEESSEM	64	89	26
TVIPEKNPPPERQIPRRGEES	66	86		0.0281	0.0965	0.2393	0.0797	0.1135	0.0139			ILKKPLPPEPTAAPIST	197	213		-0.0455	0.0243	-0.0233	0.004	0.0518		ILKKPLPPEPTAAPIST	197	213		-0.0455	0.0243	-0.0233	0.004	0.0518				TVIPEKNPPPERQIPRRGEE	66	85	20
VETVIPEKNPPPERQIPRRGEESSEM	64	89		-0.1937	0.1074	0.0362	0.0724	0.179	0.1824			ILKKPLPPEPTAAPISTTE	197	215		-0.1303	0.0332	0.1458	0.0669	-0.0998		ILKKPLPPEPTAAPISTTE	197	215		-0.1303	0.0332	0.1458	0.0669	-0.0998				TVIPEKNPPPERQIPRRGEES	66	86	21
TVIPEKNPPPERQIPRRGEESSE	66	88		-0.0055	0.0339	0.0868	0.0997	0.1039	0.2123			YDYMPMNA	223	230		0.1304	0.0784	0.0873	0.1307	0.1719		YDYMPMNA	223	230		0.1304	0.0784	0.0873	0.1307	0.1719				TVIPEKNPPPERQIPRRGEESSE	66	88	23
TVIPEKNPPPERQIPRRGEESSEM	66	89		-0.0792	0.113	-0.069	0.1585	0.1902	0.2094			YDYMPMNAND	223	232		0.1203	0.1432	0.1647	0.2063	0.1785		YDYMPMNAND	223	232		0.1203	0.1432	0.1647	0.2063	0.1785				TVIPEKNPPPERQIPRRGEESSEM	66	89	24
ISIIERFPYPFQ	92	103		-0.079	0.0394	-0.0494	-0.0355	0.029	-0.0594			LQLRKGEE	233	240		0.0382	0.1162	0.2552	0.4546	0.2586		LQLRKGEE	233	240		0.0382	0.1162	0.2552	0.4546	0.2586				ISIIERFPYPFQ	92	103	12
IIERFPYPFQVVY	94	106		-0.087	0.01	0.0755	0.0768	0.02	0.0356			LQLRKGEEY	233	241		0.0098	0.0327	0.1585	0.4759	0.3518		LQLRKGEEY	233	241		0.0098	0.0327	0.1585	0.4759	0.3518				IIERFPYPFQVVY	94	106	13
IERFPYPFQVVY	95	106		-0.0947	0.1133	-0.1131	-0.0802	0.0214	-0.0121			ILEESNLPWWRARDKNGQE	243	261		-0.031	0.1371	0.0309	0.4795	0.3662		ILEESNLPWWRARDKNGQE	243	261		-0.031	0.1371	0.0309	0.4795	0.3662				IERFPYPFQVVY	95	106	12
VVYDEGPL	104	111		-0.0553	0.0355	-0.0447	0.0066	-0.0091	-0.0107			ILEESNLPWWRARDKNGQEGYIPSN	243	267		-0.0115	0.1718	0.368	0.7413	0.5555		ILEESNLPWWRARDKNGQEGYIPSN	243	267		-0.0115	0.1718	0.368	0.7413	0.5555				VVYDEGPL	104	111	8
VVYDEGPLY	104	112		-0.065	0.0137	-0.0667	0.0208	-0.0012	0.0246			ILEESNLPWWRARDKNGQEGYIPSNY	243	268		-0.0204	0.2	0.424	0.7264	0.4037		ILEESNLPWWRARDKNGQEGYIPSNY	243	268		-0.0204	0.2	0.424	0.7264	0.4037				VVYDEGPLY	104	112	9
VVYDEGPLYVF	104	114		0.003	0.0084	-0.0671	0.0175	0.0063	0.0932			EESNLPWWRARDKNGQEGYIPSN	245	267		-0.0347	0.146	0.4335	0.5499	0.5835		EESNLPWWRARDKNGQEGYIPSN	245	267		-0.0347	0.146	0.4335	0.5499	0.5835				VVYDEGPLYVF	104	114	11
DEGPLYV	107	113		-0.0411	0.0067	-0.0786	-0.0437	-0.0569	-0.0032			EESNLPWWRARDKNGQEGYIPSNY	245	268		0.0578	0.202	0.4264	0.6784	0.4931		EESNLPWWRARDKNGQEGYIPSNY	245	268		0.0578	0.202	0.4264	0.6784	0.4931				VVYDEGPLYVFSPTEE	104	119	16
VVYDEGPLYVFSPTEE	104	119		-0.1225	0.0011	0.0429	0.0552	0.0353	0.0414			AEDSIEM	272	278		0.0322	0.1502	0.1024	0.0541	0.0888		AEDSIEM	272	278		0.0322	0.1502	0.1024	0.0541	0.0888				VVYDEGPLYVFSPTEEL	104	120	17
VVYDEGPLYVFSPTEEL	104	120		-0.0848	0.0456	0.0975	0.1291	0.0638	0.1305			YEWYSKHMTRSQAEQL	279	294		-0.0666	0.235	0.5389	0.8631	0.4632		YEWYSKHMTRSQAEQL	279	294		-0.0666	0.235	0.5389	0.8631	0.4632				VVYDEGPLYVFSPTEELRKRWIHQLKN	104	130	27
DEGPLYVFSPTEE	107	119		-0.0962	-0.172	-0.0513	-0.029	-0.021	0.1374			WYSKHMTRSQAEQL	281	294		-0.0603	0.1449	0.5116	0.8979	0.3677		WYSKHMTRSQAEQL	281	294		-0.0603	0.1449	0.5116	0.8979	0.3677				DEGPLYV	107	113	7
YVFSPTEE	112	119		-0.0118	0.0146	-0.0341	-0.0032	0.0297	0.0675			YSKHMTRSQAEQL	282	294		-0.0842	0.1531	0.4307	0.8937	0.4496		YSKHMTRSQAEQL	282	294		-0.0842	0.1531	0.4307	0.8937	0.4496				DEGPLYVFSPTEE	107	119	13
VVYDEGPLYVFSPTEELRKRWIHQLKN	104	130		-0.1639	-0.0018	-0.17	-0.02	0.0129	-0.1369			FAKSTGEPQGVIRH	320	333		0.0098	0.1372	0.3206	0.315	0.1528		FAKSTGEPQGVIRH	320	333		0.0098	0.1372	0.3206	0.315	0.1528				YVFSPTEE	112	119	8
LRKRWIHQLKN	120	130		0.008	0.0146	-0.0618	-0.022	-0.0277	0.0249			FAKSTGEPQGVIRHYVV	320	336		-0.2445	0.1634	0.3172	0.9633	0.3359		FAKSTGEPQGVIRHYVV	320	336		-0.2445	0.1634	0.3172	0.9633	0.3359				LRKRWIHQLKN	120	130	11
LRKRWIHQLKNVIRY	120	134		0.1397	0.0482	0.1583	0.0735	-0.0156	-0.1942			FAKSTGEPQGVIRHYVVC	320	337		-0.3008	0.181	0.561	0.7135	0.3947		FAKSTGEPQGVIRHYVVC	320	337		-0.3008	0.181	0.561	0.7135	0.3947				LRKRWIHQLKNVIRY	120	134	15
VIRYNSDL	131	138		-0.0436	0.078	0.102	-0.0968	0.1157	0.0951			AKSTGEPQGVIRHYVV	321	336		-0.3074	0.015	0.3055	0.7362	0.3547		AKSTGEPQGVIRHYVV	321	336		-0.3074	0.015	0.3055	0.7362	0.3547				VIRYNSDL	131	138	8
LVQKYHPCF	138	146		-0.1094	0.0831	-0.141	-0.0761	-0.1662	-0.0724			AKSTGEPQGVIRHYVVC	321	337		-0.333	0.0052	0.482	0.7948	0.357		AKSTGEPQGVIRHYVVC	321	337		-0.333	0.0052	0.482	0.7948	0.357				LVQKYHPCF	138	146	9
VQKYHPCF	139	146		0.0064	0.0361	0.0107	0.0457	-0.0006	0.0624			YVVCSTPQSQY	334	344		0.0348	0.1539	0.3721	0.4133	0.3412		YVVCSTPQSQY	334	344		0.0348	0.1539	0.3721	0.4133	0.3412				VQKYHPCF	139	146	8
QKYHPCF	140	146		-0.0115	0.0019	-0.0077	0.018	0.0311	0.0387			YLAEKHLFSTIPEL	345	358		0.043	0.1569	0.2821	0.3257	0.1484		YLAEKHLFSTIPEL	345	358		0.043	0.1569	0.2821	0.3257	0.1484				QKYHPCF	140	146	7
WIDGQYL	147	153		0.0186	0.0683	0.0274	0.0028	-0.011	0.0001			FSTIPEL	352	358		0.0348	0.0843	0.1431	0.2062	0.1409		FSTIPEL	352	358		0.0348	0.0843	0.1431	0.2062	0.1409				WIDGQYL	147	153	7
WIDGQYLC	147	154		0.0058	0.053	0.0477	0.0776	0.0024	0.0094			ISRLKYPVSKQNKNAPSTAGL	370	390		0.2392	0.3672	0.8344	0.1512	0.1178		ISRLKYPVSKQNKNAPSTAGL	370	390		0.2392	0.3672	0.8344	0.1512	0.1178				WIDGQYLC	147	154	8
LCCSQTAKNAMG	153	164		-0.0765	0.1241	-0.0166	0.0608	0.0679	0.0779			ISRLKYPVSKQNKNAPSTAGLG	370	391		0.1652	0.4287	0.8754	0.2111	0.0746		ISRLKYPVSKQNKNAPSTAGLG	370	391		0.1652	0.4287	0.8754	0.2111	0.0746				LCCSQTAKNAMG	153	164	12
LCCSQTAKNAMGCQ	153	166		-0.0009	0.0917	0.0013	0.1875	0.159	0.2852			ISRLKYPVSKQNKNAPSTAGLGYGSW	370	395		0.1259	0.3718	0.7579	0.2001	-0.0062		ISRLKYPVSKQNKNAPSTAGLGYGSW	370	395		0.1259	0.3718	0.7579	0.2001	-0.0062				LCCSQTAKNAMGCQ	153	166	14
CCSQTAKNAMGCQ	154	166		-0.1067	0.0695	0.1581	0.0687	-0.003	0.0986			KQNKNAPSTAGLGYGSW	379	395		-0.0312	0.0427	0.1693	0.0531	0.0777		KQNKNAPSTAGLGYGSW	379	395		-0.0312	0.0427	0.1693	0.0531	0.0777				CCSQTAKNAMGCQ	154	166	13
SQTAKNAMGC	156	165		-0.104	0.0542	0.1644	0.0737	0.061	0.0575			EIDPKDLTF	396	404		0.0263	0.1046	0.1576	0.0856	0.0937		EIDPKDLTF	396	404		0.0263	0.1046	0.1576	0.0856	0.0937				SQTAKNAMGC	156	165	10
SQTAKNAMGCQ	156	166		-0.0328	0.0279	-0.0239	0.0643	0.0947	0.1028			EIDPKDLTFL	396	405		-0.0169	0.1138	0.0994	0.0367	-0.0131		EIDPKDLTFL	396	405		-0.0169	0.1138	0.0994	0.0367	-0.0131				SQTAKNAMGCQ	156	166	11
TAKNAMGCQ	158	166		-0.128	0.0906	0.0928	0.0712	0.0883	0.0648			FLKELGTGQF	404	413		0.1144	0.2187	0.2038	0.1228	0.0388		FLKELGTGQF	404	413		0.1144	0.2187	0.2038	0.1228	0.0388				TAKNAMGCQ	158	166	9
ILENRNGSLKPGSS	167	180		0.0512	0.1485	0.123	0.211	0.1599	0.1091			KELGTGQF	406	413		0.0157	0.0508	0.072	0.0672	0.0289		KELGTGQF	406	413		0.0157	0.0508	0.072	0.0672	0.0289				ILENRNGSLKPGSS	167	180	14
LENRNGSLKPGSS	168	180		0.0338	0.1928	0.1849	0.171	0.1822	0.1264			GVVKYGKWRGQY	414	425		0.0463	0.1771	0.2356	0.1166	0.1458		GVVKYGKWRGQY	414	425		0.0463	0.1771	0.2356	0.1166	0.1458				ILENRNGSLKPGSSHRKTKKPLPPTPEE	167	194	28
ILENRNGSLKPGSSHRKTKKPLPPTPEE	167	194		-0.1728	-0.0086	0.0009	0.1645	0.0053	-0.0181			GVVKYGKWRGQYDVA	414	428		-0.01	0.1549	0.1697	-0.0267	0.1617		GVVKYGKWRGQYDVA	414	428		-0.01	0.1549	0.1697	-0.0267	0.1617				LENRNGSLKPGSS	168	180	13
ENRNGSLKPGSSHRKTKKPLPPTPEE	169	194		-0.6142	0.1045	0.2717	0.3327	-0.3644	-0.1021			VKYGKWRGQY	416	425		0.0043	0.0957	0.1257	0.0233	0.0393		VKYGKWRGQY	416	425		0.0043	0.0957	0.1257	0.0233	0.0393				ENRNGSLKPGSSHRKTKKPLPPTPEE	169	194	26
DQILKKPLPPEPTAAPIST	195	213		-0.1115	0.1848	0.0337	0.0909	0.1214	-0.0088			KYGKWRGQY	417	425		0.0479	0.1085	0.1508	-0.2181	0.0798		KYGKWRGQY	417	425		0.0479	0.1085	0.1508	-0.2181	0.0798				DQILKKPLPPEPTAAPIST	195	213	19
QILKKPLPPEPTAAPIST	196	213		-0.0285	0.0965	0.064	0.1025	0.1063	0.0301			IREGSMSE	432	439		0.0652	0.1172	0.1057	0.1071	0.0587		IREGSMSE	432	439		0.0652	0.1172	0.1057	0.1071	0.0587				DQILKKPLPPEPTAAPISTTE	195	215	21
DQILKKPLPPEPTAAPISTTE	195	215		-0.0075	0.1013	0.2391	0.1161	0.1011	-0.0324			IREGSMSEDE	432	441		0.0604	0.1852	0.1094	0.1489	-0.0113		IREGSMSEDE	432	441		0.0604	0.1852	0.1094	0.1489	-0.0113				DQILKKPLPPEPTAAPISTTEL	195	216	22
ILKKPLPPEPTAAPIST	197	213		-0.0455	0.0243	0.0976	-0.0233	0.004	0.0518			AKVMMNLSHEKL	446	457		0.045	0.0622	0.0892	0.1362	0.099		AKVMMNLSHEKL	446	457		0.045	0.0622	0.0892	0.1362	0.099				QILKKPLPPEPTAAPIST	196	213	18
DQILKKPLPPEPTAAPISTTEL	195	216		-0.1951	0.1293	-0.0079	-0.0284	0.0138	-0.1361			NLSHEKL	451	457		0.018	0.0525	0.0511	0.024	0.0652		NLSHEKL	451	457		0.018	0.0525	0.0511	0.024	0.0652				QILKKPLPPEPTAAPISTTE	196	215	20
QILKKPLPPEPTAAPISTTE	196	215		-0.175	0.0333	-0.0444	0.1192	0.0379	0.0092			GVCTKQRPIF	462	471		-0.0287	0.0513	0.039	0.062	0.0187		GVCTKQRPIF	462	471		-0.0287	0.0513	0.039	0.062	0.0187				ILKKPLPPEPTAAPIST	197	213	17
LKKPLPPEPTAAPIST	198	213		-0.0376	-0.0213	0.02	0.0576	0.0167	-0.0198			TKQRPIF	465	471		-0.0018	0.0396	0.0565	0.0282	0.0358		TKQRPIF	465	471		-0.0018	0.0396	0.0565	0.0282	0.0358				ILKKPLPPEPTAAPISTTE	197	215	19
ILKKPLPPEPTAAPISTTE	197	215		-0.1303	0.0332	0.1344	0.1458	0.0669	-0.0998			EYLESKQFL	510	518		0.001	0.0373	-0.0219	0.024	0.0205		EYLESKQFL	510	518		0.001	0.0373	-0.0219	0.024	0.0205				LKKPLPPEPTAAPIST	198	213	16
LKKVVAL	216	222		0.0019	0.0625	0.0559	0.0989	0.4737	0.3389			YLESKQFL	511	518		-0.0189	0.0164	-0.0145	0.0553	0.0722		YLESKQFL	511	518		-0.0189	0.0164	-0.0145	0.0553	0.0722				LKKVVAL	216	222	7
YDYMPMNA	223	230		0.1304	0.0784	0.0279	0.0873	0.1307	0.1719			YLESKQFLHRDLAARNCL	511	528		0.0029	0.065	-0.0168	0.0872	0.0564		YLESKQFLHRDLAARNCL	511	528		0.0029	0.065	-0.0168	0.0872	0.0564				LYDYMPMNAND	222	232	11
LYDYMPMNAND	222	232		0.0785	0.0584	0.0471	0.1156	0.3422	0.1394			FLHRDLAARNCL	517	528		-0.2885	0.0596	0.1046	-0.079	-0.118		FLHRDLAARNCL	517	528		-0.2885	0.0596	0.1046	-0.079	-0.118				YDYMPMNA	223	230	8
YDYMPMNAND	223	232		0.1203	0.1432	0.0693	0.1647	0.2063	0.1785			CLVNDQGVVKVSD	527	539		-0.0523	0.1464	0.1657	0.0788	0.1316		CLVNDQGVVKVSD	527	539		-0.0523	0.1464	0.1657	0.0788	0.1316				YDYMPMNAND	223	232	10
NDLQLRKGEEY	231	241		0.0104	0.0724	0.0851	0.2591	0.5869	0.3576			CLVNDQGVVKVSDF	527	540		-0.019	0.1351	0.1544	0.1157	0.1263		CLVNDQGVVKVSDF	527	540		-0.019	0.1351	0.1544	0.1157	0.1263				NDLQLRKGEEY	231	241	11
LQLRKGEE	233	240		0.0382	0.1162	0.1198	0.2552	0.4546	0.2586			VNDQGVVKVSD	529	539		-0.084	0.0173	0.08	-0.0087	0.0696		VNDQGVVKVSD	529	539		-0.084	0.0173	0.08	-0.0087	0.0696				LQLRKGEE	233	240	8
LQLRKGEEY	233	241		0.0098	0.0327	0.0609	0.1585	0.4759	0.3518			VNDQGVVKVSDFGL	529	542		-0.0195	0.1189	0.0382	0.038	0.068		VNDQGVVKVSDFGL	529	542		-0.0195	0.1189	0.0382	0.038	0.068				LQLRKGEEY	233	241	9
QLRKGEE	234	240		0.0749	0.102	0.0875	0.2387	0.4695	0.3199			VNDQGVVKVSDFGLS	529	543		-0.042	0.113	-0.0064	0.1001	0.0539		VNDQGVVKVSDFGLS	529	543		-0.042	0.113	-0.0064	0.1001	0.0539				LQLRKGEEYF	233	242	10
LQLRKGEEYF	233	242		0.0192	0.0606	0.1338	0.2379	0.5053	0.433			VNDQGVVKVSDFGLSRY	529	545		-0.0757	0.2088	0.1097	0.1234	0.0365		VNDQGVVKVSDFGLSRY	529	545		-0.0757	0.2088	0.1097	0.1234	0.0365				QLRKGEE	234	240	7
QLRKGEEY	234	241		0.0392	0.0946	0.1382	0.2271	0.4892	0.3016			VNDQGVVKVSDFGLSRYVL	529	547		-0.0528	0.1774	0.005	-0.0122	0.1615		VNDQGVVKVSDFGLSRYVL	529	547		-0.0528	0.1774	0.005	-0.0122	0.1615				QLRKGEEY	234	241	8
RKGEEYF	236	242		-0.0461	-0.0513	-0.0328	0.1003	0.2329	0.1941			VVKVSDF	534	540		-0.0073	0.1272	0.0836	0.0945	0.0152		VVKVSDF	534	540		-0.0073	0.1272	0.0836	0.0945	0.0152				RKGEEYF	236	242	7
ILEESNLPWWRARDKNGQE	243	261		-0.031	0.1371	0.2172	0.0309	0.4795	0.3662			VVKVSDFGL	534	542		0.0314	0.0798	0.0544	0.023	0.041		VVKVSDFGL	534	542		0.0314	0.0798	0.0544	0.023	0.041				ILEESNLPWWRARDKNGQE	243	261	19
ILEESNLPWWRARDKNGQEGYIPSN	243	267		-0.0115	0.1718	0.1655	0.368	0.7413	0.5555			FGLSRYVL	540	547		-0.002	0.1563	0.0474	0.1196	0.0206		FGLSRYVL	540	547		-0.002	0.1563	0.0474	0.1196	0.0206				ILEESNLPWWRARDKNGQEGYIPSN	243	267	25
ILEESNLPWWRARDKNGQEGYIPSNY	243	268		-0.0204	0.2	0.2472	0.424	0.7264	0.4037			FGLSRYVLDD	540	549		0.0032	0.2044	0.0577	0.0772	0.0547		FGLSRYVLDD	540	549		0.0032	0.2044	0.0577	0.0772	0.0547				ILEESNLPWWRARDKNGQEGYIPSNY	243	268	26
EESNLPWWRARDKNGQEGYIPSN	245	267		-0.0347	0.146	0.3163	0.4335	0.5499	0.5835			GLSRYVL	541	547		0.0224	0.1948	0.1232	0.1005	0.0549		GLSRYVL	541	547		0.0224	0.1948	0.1232	0.1005	0.0549				EESNLPWWRARDKNGQEGYIPSN	245	267	23
EESNLPWWRARDKNGQEGYIPSNY	245	268		0.0578	0.202	0.2585	0.4264	0.6784	0.4931			GLSRYVLDD	541	549		-0.0193	0.176	0.1846	0.0128	-0.0033		GLSRYVLDD	541	549		-0.0193	0.176	0.1846	0.0128	-0.0033				EESNLPWWRARDKNGQEGYIPSNY	245	268	24
ESNLPWWRARDKNGQEGYIPSNY	246	268		0.0261	0.2105	0.3373	0.472	0.6968	0.5546			GLSRYVLDDE	541	550		0.0502	0.118	0.0949	0.0744	0.2405		GLSRYVLDDE	541	550		0.0502	0.118	0.0949	0.0744	0.2405				ESNLPWWRARDKNGQEGYIPSNY	246	268	23
SNLPWWRARDKNGQEGYIPSN	247	267		0.2073	0.3215	0.3539	0.3269	0.9029	0.5424			SRYVLDD	543	549		-0.012	0.2301	0.0413	0.0317	0.0052		SRYVLDD	543	549		-0.012	0.2301	0.0413	0.0317	0.0052				SNLPWWRARDKNGQEGYIPSN	247	267	21
SNLPWWRARDKNGQEGYIPSNY	247	268		0.0562	0.1211	0.257	0.4541	0.8309	0.5033			EYTSSVGSKF	550	559		-0.109	-0.0331	0.099	0.0031	0.0378		EYTSSVGSKF	550	559		-0.109	-0.0331	0.099	0.0031	0.0378				SNLPWWRARDKNGQEGYIPSNY	247	268	22
GYIPSNY	262	268		0.0562	0.0604	0.0378	0.1588	0.2522	0.225			EYTSSVGSKFPVRWSPPEVL	550	569		0.0466	0.1172	0.1244	0.048	0.0655		EYTSSVGSKFPVRWSPPEVL	550	569		0.0466	0.1172	0.1244	0.048	0.0655				GYIPSNY	262	268	7
AEDSIEM	272	278		0.0322	0.1502	0.0629	0.1024	0.0541	0.0888			YTSSVGSKF	551	559		-0.0045	0.0356	0.0147	-0.0168	0.1154		YTSSVGSKF	551	559		-0.0045	0.0356	0.0147	-0.0168	0.1154				AEDSIEM	272	278	7
YEWYSKHMTRSQAEQL	279	294		-0.0666	0.235	0.2758	0.5389	0.8631	0.4632			TSSVGSKFPVRWSPPEVL	552	569		0.0127	0.1459	0.1508	0.1242	0.0667		TSSVGSKFPVRWSPPEVL	552	569		0.0127	0.1459	0.1508	0.1242	0.0667				YEWYSKHMTRSQAEQL	279	294	16
YEWYSKHMTRSQAEQLL	279	295		-0.409	0.2538	0.3891	0.4836	1.2297	0.4678			MYSKFSSKSDIWA	570	582		-0.0062	0.0727	0.0339	0.0676	0.1292		MYSKFSSKSDIWA	570	582		-0.0062	0.0727	0.0339	0.0676	0.1292				YEWYSKHMTRSQAEQLL	279	295	17
WYSKHMTRSQAEQL	281	294		-0.0603	0.1449	0.2511	0.5116	0.8979	0.3677			SSKSDIWA	575	582		0.0217	0.0516	0.0568	0.0415	0.0863		SSKSDIWA	575	582		0.0217	0.0516	0.0568	0.0415	0.0863				WYSKHMTRSQAEQL	281	294	14
YSKHMTRSQAEQ	282	293		-0.1111	-0.0708	0.2096	0.4593	0.6618	0.2635			SSKSDIWAF	575	583		0.0586	0.0443	0.0752	0.0567	0.0816		SSKSDIWAF	575	583		0.0586	0.0443	0.0752	0.0567	0.0816				YSKHMTRSQAEQ	282	293	12
YSKHMTRSQAEQL	282	294		-0.0842	0.1531	0.2599	0.4307	0.8937	0.4496			MWEIYSL	587	593		-0.0123	0.031	0.0189	-0.0062	0.0152		MWEIYSL	587	593		-0.0123	0.031	0.0189	-0.0062	0.0152				YSKHMTRSQAEQL	282	294	13
LLKQEGKEGGF	294	304		-0.0152	0.2327	0.4097	0.2473	0.5199	0.0409			MWEIYSLGKMPYERF	587	601		-0.0977	0.0472	-0.011	-0.0114	0.0536		MWEIYSLGKMPYERF	587	601		-0.0977	0.0472	-0.011	-0.0114	0.0536				LLKQEGKEGGF	294	304	11
IVRDSSKAGKY	305	315		-0.4452	-0.1007	0.0488	-0.0228	-0.0579	-0.1389			WEIYSLGKMPYERF	588	601		-0.153	-0.0221	-0.024	-0.1276	-0.0898		WEIYSLGKMPYERF	588	601		-0.153	-0.0221	-0.024	-0.1276	-0.0898				IVRDSSKAGKY	305	315	11
VRDSSKAGKY	306	315		-0.4633	-0.1327	-0.0023	-0.027	0.1169	0.0552			WEIYSLGKMPYERFTNSE	588	605		-0.1305	0.0708	-0.0652	-0.0107	-0.0755		WEIYSLGKMPYERFTNSE	588	605		-0.1305	0.0708	-0.0652	-0.0107	-0.0755				IVRDSSKAGKYTVSV	305	319	15
FAKSTGEPQGVIRH	320	333		0.0098	0.1372	0.0482	0.3206	0.315	0.1528			IYSLGKMPYERF	590	601		0.0463	0.1049	-0.0414	-0.038	-0.0505		IYSLGKMPYERF	590	601		0.0463	0.1049	-0.0414	-0.038	-0.0505				VRDSSKAGKY	306	315	10
FAKSTGEPQGVIRHYVV	320	336		-0.2445	0.1634	0.097	0.3172	0.9633	0.3359			GKMPYERF	594	601		-0.0896	0.0929	0.0819	0.0323	0.0548		GKMPYERF	594	601		-0.0896	0.0929	0.0819	0.0323	0.0548				FAKSTGEPQGVIRH	320	333	14
FAKSTGEPQGVIRHYVVC	320	337		-0.3008	0.181	0.1953	0.561	0.7135	0.3947			GKMPYERFTNSE	594	605		-0.2401	0.1286	0.1616	0.215	0.112		GKMPYERFTNSE	594	605		-0.2401	0.1286	0.1616	0.215	0.112				FAKSTGEPQGVIRHYVV	320	336	17
AKSTGEPQGVIRHYVV	321	336		-0.3074	0.015	0.277	0.3055	0.7362	0.3547			GKMPYERFTNSETAE	594	608		-0.0871	0.1233	0.1089	0.0712	0.0562		GKMPYERFTNSETAE	594	608		-0.0871	0.1233	0.1089	0.0712	0.0562				FAKSTGEPQGVIRHYVVC	320	337	18
AKSTGEPQGVIRHYVVC	321	337		-0.333	0.0052	0.2839	0.482	0.7948	0.357			TAEHIAQGLRLPRPHL	606	621		-0.0683	0.063	-0.0175	-0.0087	0.0366		TAEHIAQGLRLPRPHL	606	621		-0.0683	0.063	-0.0175	-0.0087	0.0366				FAKSTGEPQGVIRHYVVCSTPQSQ	320	343	24
PQGVIRH	327	333		0.0344	0.0154	0.0815	0.1183	0.2268	0.0975			HIAQGLRLPRPHL	609	621		0.0598	0.087	0.1451	0.0561	0.0868		HIAQGLRLPRPHL	609	621		0.0598	0.087	0.1451	0.0561	0.0868				AKSTGEPQGVIRHYVV	321	336	16
FAKSTGEPQGVIRHYVVCSTPQSQ	320	343		-0.3087	0.1045	0.3858	0.7026	0.9862	0.5603			HIAQGLRLPRPHLAS	609	623		0.011	0.1431	0.0795	0.0949	0.1399		HIAQGLRLPRPHLAS	609	623		0.011	0.1431	0.0795	0.0949	0.1399				AKSTGEPQGVIRHYVVC	321	337	17
PQGVIRHYVVC	327	337		-0.2722	0.1112	0.2237	0.3447	0.7703	0.335			LRLPRPHLAS	614	623		0.0152	0.046	0.0509	0.0384	0.0768		LRLPRPHLAS	614	623		0.0152	0.046	0.0509	0.0384	0.0768				PQGVIRH	327	333	7
YVVCSTPQSQ	334	343		0.0099	0.4473	0.227	0.1467	0.3133	0.2353			YSCWHEKA	631	638		0.0532	0.1843	0.161	0.0891	0.0386		YSCWHEKA	631	638		0.0532	0.1843	0.161	0.0891	0.0386				PQGVIRHYVVC	327	337	11
YVVCSTPQSQY	334	344		0.0348	0.1539	0.1788	0.3721	0.4133	0.3412			YSCWHEKADERPSF	631	644		0.0225	0.0813	0.0862	0.0571	0.1251		YSCWHEKADERPSF	631	644		0.0225	0.0813	0.0862	0.0571	0.1251				YVVCSTPQSQ	334	343	10
CSTPQSQY	337	344		0.0857	0.2132	0.1562	0.2764	0.1913	0.1016			SCWHEKADERPSF	632	644		0.0504	0.0963	0.1631	0.1335	0.1478		SCWHEKADERPSF	632	644		0.0504	0.0963	0.1631	0.1335	0.1478				YVVCSTPQSQY	334	344	11
STPQSQY	338	344		0.0448	0.1304	0.1018	0.2613	0.189	0.0685			CWHEKADERPSF	633	644		0.0187	0.029	0.055	0.0537	0.1565		CWHEKADERPSF	633	644		0.0187	0.029	0.055	0.0537	0.1565				CSTPQSQY	337	344	8
YYLAEKHLFSTI	344	355		-0.0341	0.1077	0.1059	0.1513	0.1307	-0.0276			HEKADERPSF	635	644		0.0176	0.0754	0.0889	0.0754	0.087		HEKADERPSF	635	644		0.0176	0.0754	0.0889	0.0754	0.087				STPQSQY	338	344	7
YLAEKHLFSTI	345	355		0.037	0.1336	0.122	0.2387	0.2812	0.0266																									YYLAEKHLFSTI	344	355	12
YYLAEKHLFSTIPEL	344	358		0.0032	0.1535	0.1282	0.337	0.2973	0.1835																									YYLAEKHLFSTIPEL	344	358	15
YLAEKHLFSTIPEL	345	358		0.043	0.1569	0.1534	0.2821	0.3257	0.1484																									YLAEKHLFSTI	345	355	11
YLAEKHLFSTIPELINY	345	361		0.1496	0.0851	0.39	0.5941	0.9301	0.5359																									YLAEKHLFSTIPEL	345	358	14
FSTIPEL	352	358		0.0348	0.0843	0.0692	0.1431	0.2062	0.1409																									YLAEKHLFSTIPELINY	345	361	17
INYHQHNSAGL	359	369		0.0802	0.2096	0.2615	0.2742	0.3254	0.1432																									FSTIPEL	352	358	7
NYHQHNSAGL	360	369		0.0815	0.1648	0.1759	0.3123	0.2194	0.0281																									INYHQHNSAGL	359	369	11
YHQHNSAGL	361	369		-0.032	0.0612	0.1589	0.3387	0.2748	0.0688																									NYHQHNSAGL	360	369	10
ISRLKYPVSKQNKNAPST	370	387		0.2272	0.3927	0.7846	1.1001	0.304	0.19																									YHQHNSAGL	361	369	9
ISRLKYPVSKQNKNAPSTAGL	370	390		0.2392	0.3672	0.7806	0.8344	0.1512	0.1178																									ISRLKYPVSKQNKNAPST	370	387	18
ISRLKYPVSKQNKNAPSTAGLG	370	391		0.1652	0.4287	0.6748	0.8754	0.2111	0.0746																									ISRLKYPVSKQNKNAPSTAGL	370	390	21
ISRLKYPVSKQNKNAPSTAGLGY	370	392		0.2596	0.3586	0.6856	0.6978	0.1483	0.2191																									ISRLKYPVSKQNKNAPSTAGLG	370	391	22
ISRLKYPVSKQNKNAPSTAGLGYGSW	370	395		0.1259	0.3718	0.6611	0.7579	0.2001	-0.0062																									ISRLKYPVSKQNKNAPSTAGLGY	370	392	23
KQNKNAPSTAGLGYGSW	379	395		-0.0312	0.0427	0.1242	0.1693	0.0531	0.0777																									ISRLKYPVSKQNKNAPSTAGLGYGSW	370	395	26
EIDPKDLTF	396	404		0.0263	0.1046	0.0419	0.1576	0.0856	0.0937																									KQNKNAPSTAGLGYGSW	379	395	17
EIDPKDLTFL	396	405		-0.0169	0.1138	0.0314	0.0994	0.0367	-0.0131																									EIDPKDLTF	396	404	9
DPKDLTF	398	404		0.025	0.1148	0.0593	0.1024	0.0707	0.122																									EIDPKDLTFL	396	405	10
FLKELGTGQF	404	413		0.1144	0.2187	0.0406	0.2038	0.1228	0.0388																									DPKDLTF	398	404	7
KELGTGQF	406	413		0.0157	0.0508	0.03	0.072	0.0672	0.0289																									FLKELGTGQF	404	413	10
LKELGTGQFGVVKYGKWRGQY	405	425		0.1049	-0.0494	0.1085	0.1175	0.1818	-0.0322																									LKELGTGQFGVVKYGKWRGQY	405	425	21
GVVKYGKW	414	421		0.0137	0.1627	0.2456	0.2667	0.2192	0.1376																									KELGTGQF	406	413	8
GVVKYGKWRGQY	414	425		0.0463	0.1771	0.1963	0.2356	0.1166	0.1458																									GVVKYGKW	414	421	8
VKYGKWRGQY	416	425		0.0043	0.0957	0.1146	0.1257	0.0233	0.0393																									GVVKYGKWRGQY	414	425	12
GVVKYGKWRGQYDVA	414	428		-0.01	0.1549	0.0348	0.1697	-0.0267	0.1617																									GVVKYGKWRGQYDVA	414	428	15
KYGKWRGQY	417	425		0.0479	0.1085	0.0517	0.1508	-0.2181	0.0798																									VKYGKWRGQY	416	425	10
IREGSMSE	432	439		0.0652	0.1172	0.0209	0.1057	0.1071	0.0587																									KYGKWRGQY	417	425	9
IREGSMSED	432	440		-0.0791	0.0748	0.1024	0.1242	0.085	0.1738																									IREGSMSE	432	439	8
IREGSMSEDE	432	441		0.0604	0.1852	0.0963	0.1094	0.1489	-0.0113																									IREGSMSED	432	440	9
IREGSMSEDEF	432	442		-0.0746	0.0313	-0.0263	0.0171	0.0768	0.0835																									IREGSMSEDE	432	441	10
IEEAKVMMNLSHEKL	443	457		-0.084	-0.0567	-0.0036	-0.0286	-0.0376	-0.0451																									IREGSMSEDEF	432	442	11
AKVMMNLSHEKL	446	457		0.045	0.0622	-0.0119	0.0892	0.1362	0.099																									IEEAKVMMNLSHEKL	443	457	15
KVMMNLSHEKL	447	457		0.0416	0.0438	0.046	0.0196	-0.0937	0.109																									AKVMMNLSHEKL	446	457	12
MNLSHEKL	450	457		0.0177	0.0959	0.0165	0.0263	0.0792	0.0609																									KVMMNLSHEKL	447	457	11
NLSHEKL	451	457		0.018	0.0525	0.0146	0.0511	0.024	0.0652																									MNLSHEKL	450	457	8
GVCTKQRPIF	462	471		-0.0287	0.0513	-0.0295	0.039	0.062	0.0187																									NLSHEKL	451	457	7
YGVCTKQRPIFIIT	461	474		-0.0562	-0.0026	-0.0199	0.0862	0.0943	0.0009																									YGVCTKQRPIFIIT	461	474	14
YGVCTKQRPIFIITE	461	475		-0.0215	-0.0259	0.006	0.0907	0.0356	0.088																									YGVCTKQRPIFIITE	461	475	15
TKQRPIF	465	471		-0.0018	0.0396	0.0078	0.0565	0.0282	0.0358																									GVCTKQRPIF	462	471	10
TKQRPIFIIT	465	474		0.1248	-0.0481	-0.0259	0.2952	0.0234	-0.0794																									TKQRPIF	465	471	7
EYMANGCL	475	482		0.037	0.0919	0.0886	0.1168	0.0968	0.0659																									TKQRPIFIIT	465	474	10
YMANGCL	476	482		0.0653	0.144	0.0951	0.1631	0.1184	0.1583																									EYMANGCL	475	482	8
YMANGCLL	476	483		0.0114	0.0591	0.0478	0.0652	0.0382	0.0607																									YMANGCL	476	482	7
MANGCLL	477	483		0.0157	0.0723	-0.01	0.0525	0.0509	0.0533																									YMANGCLL	476	483	8
LREMRHRFQTQQL	486	498		-0.0835	0.0308	-0.0025	0.1072	0.0947	0.1012																									MANGCLL	477	483	7
MRHRFQTQQL	489	498		-0.0977	0.0234	-0.0023	0.0852	0.0647	0.0506																									LREMRHRFQTQQL	486	498	13
MCKDVCE	501	507		0.0636	0.0532	0.0591	0.0461	0.034	0.0339																									MRHRFQTQQL	489	498	10
MCKDVCEA	501	508		-0.0352	0.022	0.0254	-0.0729	-0.0079	-0.1665																									MCKDVCE	501	507	7
CKDVCEA	502	508		0.037	0.0495	-0.0019	0.034	0.0255	0.0436																									MCKDVCEA	501	508	8
MEYLESKQFL	509	518		0.0461	-0.002	0.0622	-0.012	0.029	-0.1443																									CKDVCEA	502	508	7
EYLESKQFL	510	518		0.001	0.0373	0.0153	-0.0219	0.024	0.0205																									MEYLESKQFL	509	518	10
YLESKQFL	511	518		-0.0189	0.0164	-0.0301	-0.0145	0.0553	0.0722																									EYLESKQFL	510	518	9
EYLESKQFLHRDLAARNCL	510	528		-0.0541	-0.0637	-0.1453	0.0303		0.0851																									EYLESKQFLHRDLAARNCL	510	528	19
YLESKQFLHRDLAARNCL	511	528		0.0029	0.065	-0.0409	-0.0168	0.0872	0.0564																									YLESKQFL	511	518	8
FLHRDLAA	517	524		0.0776	0.1082	0.0527	0.1075	0.1179	0.0992																									YLESKQFLHRDLAARNCL	511	528	18
FLHRDLAARN	517	526		-0.0025	0.0653	-0.2312	0.1959	0.0708	-0.0479																									FLHRDLAA	517	524	8
FLHRDLAARNCL	517	528		-0.2885	0.0596	-0.0077	0.1046	-0.079	-0.118																									FLHRDLAARN	517	526	10
HRDLAARN	519	526		-0.0821	-0.0005	0.0691	-0.0596	0.05	0.0064																									FLHRDLAARNCL	517	528	12
HRDLAARNCL	519	528		0.063	0.0878	0.0285	0.0619	0.07	0.1337																									HRDLAARN	519	526	8
RNCLVNDQGVVKVSDF	525	540		-0.0929	0.097	0.009	0.053	0.043	0.1827																									HRDLAARNCL	519	528	10
CLVNDQGVVKVSD	527	539		-0.0523	0.1464	0.0994	0.1657	0.0788	0.1316																									RNCLVNDQGVVKVSDF	525	540	16
CLVNDQGVVKVSDF	527	540		-0.019	0.1351	0.1182	0.1544	0.1157	0.1263																									CLVNDQGVVKVSD	527	539	13
LVNDQGVVKVSDF	528	540		0.0362	0.0838	0.0376	0.1283	0.1231	0.0337																									CLVNDQGVVKVSDF	527	540	14
VNDQGVVKVSD	529	539		-0.084	0.0173	0.0317	0.08	-0.0087	0.0696																									CLVNDQGVVKVSDFGL	527	542	16
CLVNDQGVVKVSDFGL	527	542		-0.0344	0.1527	0.0662	0.2336	0.3049	0.113																									LVNDQGVVKVSDF	528	540	13
VNDQGVVKVSDF	529	540		0.0102	0.1193		0.0468	0.0874	0.1368																									VNDQGVVKVSD	529	539	11
VNDQGVVKVSDFGL	529	542		-0.0195	0.1189	0.0573	0.0382	0.038	0.068																									VNDQGVVKVSDF	529	540	12
VNDQGVVKVSDFGLS	529	543		-0.042	0.113	0.0036	-0.0064	0.1001	0.0539																									VNDQGVVKVSDFGL	529	542	14
VNDQGVVKVSDFGLSR	529	544			0.1171	0.1344	0.0821	0.0042	0.11																									VNDQGVVKVSDFGLS	529	543	15
VNDQGVVKVSDFGLSRY	529	545		-0.0757	0.2088	0.0675	0.1097	0.1234	0.0365																									VNDQGVVKVSDFGLSR	529	544	16
VVKVSDF	534	540		-0.0073	0.1272	0.0886	0.0836	0.0945	0.0152																									VNDQGVVKVSDFGLSRY	529	545	17
VNDQGVVKVSDFGLSRYVL	529	547		-0.0528	0.1774	0.0512	0.005	-0.0122	0.1615																									VNDQGVVKVSDFGLSRYVL	529	547	19
VVKVSDFGL	534	542		0.0314	0.0798	0.0204	0.0544	0.023	0.041																									VNDQGVVKVSDFGLSRYVLDD	529	549	21
VNDQGVVKVSDFGLSRYVLDD	529	549		-0.1141	0.1714	0.2246	-0.0181	0.0324	-0.0642																									VNDQGVVKVSDFGLSRYVLDDE	529	550	22
VNDQGVVKVSDFGLSRYVLDDE	529	550		0.0327	0.1705	0.15	0.0868	0.0116	0.222																									VVKVSDF	534	540	7
FGLSRYVL	540	547		-0.002	0.1563	0.0755	0.0474	0.1196	0.0206																									VVKVSDFGL	534	542	9
GLSRYVL	541	547		0.0224	0.1948	0.1207	0.1232	0.1005	0.0549																									FGLSRYVL	540	547	8
FGLSRYVLDD	540	549		0.0032	0.2044	0.0723	0.0577	0.0772	0.0547																									FGLSRYVLDD	540	549	10
FGLSRYVLDDE	540	550		0.038	0.2146	-0.0798	-0.0014	0.1715	0.0209																									FGLSRYVLDDE	540	550	11
GLSRYVLDD	541	549		-0.0193	0.176	-0.0558	0.1846	0.0128	-0.0033																									GLSRYVL	541	547	7
GLSRYVLDDE	541	550		0.0502	0.118	-0.0529	0.0949	0.0744	0.2405																									GLSRYVLDD	541	549	9
SRYVLDD	543	549		-0.012	0.2301	0.0692	0.0413	0.0317	0.0052																									GLSRYVLDDE	541	550	10
SRYVLDDE	543	550		0.0398	0.1387	0.1044	0.0845	0.0411	0.1178																									SRYVLDD	543	549	7
EYTSSVGSKF	550	559		-0.109	-0.0331	-0.0098	0.099	0.0031	0.0378																									SRYVLDDE	543	550	8
YTSSVGSKF	551	559		-0.0045	0.0356	-0.019	0.0147	-0.0168	0.1154																									EYTSSVGSKF	550	559	10
TSSVGSKF	552	559		-0.111	-0.1129	-0.1067	0.1258	-0.0414	0.0482																									EYTSSVGSKFPVRWSPPEVL	550	569	20
EYTSSVGSKFPVRWSPPEVL	550	569		0.0466	0.1172	0.0503	0.1244	0.048	0.0655																									YTSSVGSKF	551	559	9
YTSSVGSKFPVRWSPPEVL	551	569		0.023	0.155	0.0921	0.1569	0.2103	0.1101																									YTSSVGSKFPVRWSPPEVL	551	569	19
TSSVGSKFPVRWSPPEVL	552	569		0.0127	0.1459	0.0217	0.1508	0.1242	0.0667																									TSSVGSKF	552	559	8
PVRWSPPEVL	560	569		0.037	0.1027	0.053	0.0808	0.052	0.0272																									TSSVGSKFPVRWSPPEVL	552	569	18
YSKFSSKSDI	571	580		0.0476	0.0444	0.0701	0.0891	0.0754	0.0331																									PVRWSPPEVL	560	569	10
MYSKFSSKSDIWA	570	582		-0.0062	0.0727	0.0042	0.0339	0.0676	0.1292																									MYSKFSSKSDIWA	570	582	13
MYSKFSSKSDIWAF	570	583		-0.0686	0.0705	0.189	0.239	-0.1658	-0.0547																									MYSKFSSKSDIWAF	570	583	14
YSKFSSKSDIWA	571	582		-0.0248	0.0508	-0.0058	0.0445	0.0629	0.1706																									YSKFSSKSDI	571	580	10
YSKFSSKSDIWAF	571	583		-0.04	0.0617	0.0009	-0.0086	-0.0026	-0.0202																									YSKFSSKSDIWA	571	582	12
SSKSDIWA	575	582		0.0217	0.0516	0.0281	0.0568	0.0415	0.0863																									YSKFSSKSDIWAF	571	583	13
SSKSDIWAF	575	583		0.0586	0.0443	0.0455	0.0752	0.0567	0.0816																									SSKSDIWA	575	582	8
MWEIYSL	587	593		-0.0123	0.031	-0.0057	0.0189	-0.0062	0.0152																									SSKSDIWAF	575	583	9
WEIYSLGKM	588	596		-0.016	0.0025	0.0835	0.0129	-0.0207	-0.0189																									MWEIYSL	587	593	7
WEIYSLGKMPYE	588	599		-0.0646	0.0001	-0.0498	-0.0062	0.0122	0.01																									MWEIYSLGKMPYERF	587	601	15
MWEIYSLGKMPYERF	587	601		-0.0977	0.0472	-0.1167	-0.011	-0.0114	0.0536																									MWEIYSLGKMPYERFTNSE	587	605	19
WEIYSLGKMPYERF	588	601		-0.153	-0.0221	-0.1225	-0.024	-0.1276	-0.0898																									WEIYSLGKM	588	596	9
IYSLGKMPYERF	590	601		0.0463	0.1049	0.0676	-0.0414	-0.038	-0.0505																									WEIYSLGKMPYE	588	599	12
MWEIYSLGKMPYERFTNSE	587	605		0.1013	0.1107	0.087	0.1106	0.1555	0.207																									WEIYSLGKMPYERF	588	601	14
WEIYSLGKMPYERFTNS	588	604		-0.1056	0.0904	-0.028	-0.0391	0.0109	0.0426																									WEIYSLGKMPYERFTNS	588	604	17
WEIYSLGKMPYERFTNSE	588	605		-0.1305	0.0708	-0.0407	-0.0652	-0.0107	-0.0755																									WEIYSLGKMPYERFTNSE	588	605	18
SLGKMPYERF	592	601		0.0434	0.1024	-0.0636	0.0448	0.1457	0.0454																									WEIYSLGKMPYERFTNSETAE	588	608	21
IYSLGKMPYERFTNS	590	604		0.1166	-0.0811	-0.0231	0.0815	-0.0974	0.0069																									IYSLGKMPYERF	590	601	12
IYSLGKMPYERFTNSE	590	605		-0.0494	0.1168	0.1729	0.0701	0.1223	0.0596																									IYSLGKMPYERFTNS	590	604	15
GKMPYERF	594	601		-0.0896	0.0929	0.0568	0.0819	0.0323	0.0548																									IYSLGKMPYERFTNSE	590	605	16
WEIYSLGKMPYERFTNSETAE	588	608		-0.0406	0.1317	0.0549	-0.04	0.1598	0.0999																									IYSLGKMPYERFTNSETAE	590	608	19
IYSLGKMPYERFTNSETAE	590	608		-0.2629	0.1939	0.0849	-0.0059	0.0224	0.0586																									IYSLGKMPYERFTNSETAEHIA	590	611	22
GKMPYERFTNSE	594	605		-0.2401	0.1286	0.1094	0.1616	0.215	0.112																									SLGKMPYERF	592	601	10
IYSLGKMPYERFTNSETAEHIA	590	611		-0.0124	0.058	0.4767	0.0567	0.3111	-0.2456																									GKMPYERF	594	601	8
GKMPYERFTNSETAE	594	608		-0.0871	0.1233	-0.0808	0.1089	0.0712	0.0562																									GKMPYERFTNSE	594	605	12
RFTNSETAE	600	608		-0.0254	0.1074	0.0478	0.0535	0.1037	-0.0568																									GKMPYERFTNSETAE	594	608	15
TAEHIAQG	606	613		0.0192	0.12	0.1065	0.0686	-0.0121	-0.0351																									RFTNSETAE	600	608	9
TAEHIAQGLRLPRPHL	606	621		-0.0683	0.063	-0.039	-0.0175	-0.0087	0.0366																									TAEHIAQG	606	613	8
AEHIAQGLRLPRPHL	607	621		0.1116	0.1493	0.0476	0.2074	0.1327																										TAEHIAQGLRLPRPHL	606	621	16
TAEHIAQGLRLPRPHLAS	606	623		-0.0657	0.1437	-0.0332	-0.0601	0.1418	-0.0486																									TAEHIAQGLRLPRPHLAS	606	623	18
TAEHIAQGLRLPRPHLASE	606	624		-0.0801	0.1567	-0.0876	0.0386	0.0967	0.1641																									TAEHIAQGLRLPRPHLASE	606	624	19
AEHIAQGLRLPRPHLAS	607	623		-0.0684	0.0695	-0.053	0.0766	0.0247	-0.0706																									AEHIAQGLRLPRPHL	607	621	15
HIAQGLRLPRPHL	609	621		0.0598	0.087	0.0507	0.1451	0.0561	0.0868																									AEHIAQGLRLPRPHLAS	607	623	17
HIAQGLRLPRPHLAS	609	623		0.011	0.1431	0.0039	0.0795	0.0949	0.1399																									HIAQGLRLPRPHL	609	621	13
HIAQGLRLPRPHLASE	609	624		-0.0351	0.0859	0.0123	0.0646	0.0804	-0.0045																									HIAQGLRLPRPHLAS	609	623	15
HIAQGLRLPRPHLASERV	609	626		0.0085	0.1622	0.0032	-0.102	0.0167	-0.0629																									HIAQGLRLPRPHLASE	609	624	16
LRLPRPHLAS	614	623		0.0152	0.046	0.0088	0.0509	0.0384	0.0768																									HIAQGLRLPRPHLASERV	609	626	18
LRLPRPHLASE	614	624		0.0387	0.0791	0.0411	0.0382	0.0034	-0.0236																									LRLPRPHLAS	614	623	10
ERVYTIM	624	630		0.0053	0.0041	-0.0207	-0.041	0.0294	0.0288																									LRLPRPHLASE	614	624	11
YSCWHEKA	631	638		0.0532	0.1843	0.057	0.161	0.0891	0.0386																									ERVYTIM	624	630	7
SCWHEKA	632	638		-0.045	0.1139	-0.0756	-0.1022	-0.0554	0.0097																									YSCWHEKA	631	638	8
YSCWHEKADERPSF	631	644		0.0225	0.0813	0.0403	0.0862	0.0571	0.1251																									YSCWHEKADERPSF	631	644	14
SCWHEKADERPSF	632	644		0.0504	0.0963	0.0301	0.1631	0.1335	0.1478																									SCWHEKA	632	638	7
CWHEKADERPSF	633	644		0.0187	0.029	0.013	0.055	0.0537	0.1565																									SCWHEKADERPSF	632	644	13
WHEKADERPSF	634	644		0.1142	0.181	0.0769	-0.0206	0.0655	0.0357																									CWHEKADERPSF	633	644	12
HEKADERPSF	635	644		0.0176	0.0754	0.0462	0.0889	0.0754	0.087																									WHEKADERPSF	634	644	11
KILLSNIL	645	652		0.0148	0.019	-0.0213	0.0143	-0.0035	0.0093																									HEKADERPSF	635	644	10
KILLSNILD	645	653		0.0547	0.0479	0.0371	0.0226	-0.0123	-0.0374																									KILLSNIL	645	652	8
KILLSNILDV	645	654		0.0689	0.0592	0.0089	0.0446	-0.0677	-0.0907																									KILLSNILD	645	653	9
																																		KILLSNILDV	645	654	10
																																					13.3347

## Sheet: C481S
Relative Difference in Deuterium Incorporation All peptides											Relative Difference in Deuterium Incorporation All peptides												Peptide coverage
				C481S-wt											C481S-wt
Sequence	Start	End		10 sec	1 min	5 min	10 min	1 hour	4 hours		Sequence	Start	End		10 sec	1 min	5 min	10 min	1 hour	4 hours			Sequence	Start	End	length
AAVILES	2	8		0.0753	0.0468	0.0514	0.0222	0.0596	0.1792		AAVILES	2	8		0.0753	0.0468	0.0514	0.0222	0.0596	0.1792			AAVILES	2	8	7
IFLKRSQQKKKTSPLN	9	24		-0.1342	0.119	-0.0313	0.0012	-0.106	0.1952		IFLKRSQQKKKTSPLN	9	24		-0.1342	0.119	-0.0313	0.0012	-0.106	0.1952			IFLKRSQQKKKTSPLN	9	24	16
IFLKRSQQKKKTSPLNF	9	25		-0.0177	0.2855	0.0795	0.097	0.0643	0.3125		IFLKRSQQKKKTSPLNF	9	25		-0.0177	0.2855	0.0795	0.097	0.0643	0.3125			IFLKRSQQKKKTSPLNF	9	25	17
LKRSQQKKKTSPLNF	11	25		-0.2276	0.0397	0.1886	0.1606	0.164	0.126		LKRSQQKKKTSPLNF	11	25		-0.2276	0.0397	0.1886	0.1606	0.164	0.126			IFLKRSQQKKKTSPLNFKKRLFL	9	31	23
IFLKRSQQKKKTSPLNFKKRLFL	9	31									IFLKRSQQKKKTSPLNFKKRLFL	9	31		100	100	100	100	100	100			LKRSQQKKKTSPLNF	11	25	15
LKRSQQKKKTSPLNFKKRLFL	11	31		-0.0706	0.2894	0.1629	0.1456	0.1793	0.4288		LKRSQQKKKTSPLNFKKRLFL	11	31		-0.0706	0.2894	0.1629	0.1456	0.1793	0.4288			LKRSQQKKKTSPLNFKKRLFL	11	31	21
FKKRLFL	25	31		0.0214	-0.024	0.0314	-0.2129	-0.141	0.0546		FKKRLFL	25	31		0.0214	-0.024	0.0314	-0.2129	-0.141	0.0546			FKKRLFL	25	31	7
LTVHKLSY	32	39		0.0029	0.0226	-0.0344	0.0445	0.0172	0.1313		LTVHKLSY	32	39		0.0029	0.0226	-0.0344	0.0445	0.0172	0.1313			LTVHKLSY	32	39	8
TVHKLSY	33	39		-0.009	-0.0239	-0.0418	-0.0099	-0.0267	0.0667		TVHKLSY	33	39		-0.009	-0.0239	-0.0418	-0.0099	-0.0267	0.0667			LTVHKLSYYE	32	41	10
LTVHKLSYYE	32	41		0.1249	0.0212	-0.1062	0.231	0.2115	0.1747		LTVHKLSYYE	32	41		0.1249	0.0212	-0.1062	0.231	0.2115	0.1747			LTVHKLSYYEYD	32	43	12
LTVHKLSYYEYD	32	43		-0.0244	-0.4828	-0.5164	-0.5223	-0.7373	-0.6377		LTVHKLSYYEYD	32	43		-0.0244	-0.4828	-0.5164	-0.5223	-0.7373	-0.6377			TVHKLSY	33	39	7
FERGRRGSKKGSID	44	57		-0.2148	-0.1116	0.2109	0.1042	-0.2597	-0.2634		FERGRRGSKKGSID	44	57		-0.2148	-0.1116	0.2109	0.1042	-0.2597	-0.2634			YEYDFERGRRGSKKGSIDVEKITC	40	63	24
DFERGRRGSKKGSIDVE	43	59		-0.0255	0.2858	0.1762	0.2783	0.3391	0.271		DFERGRRGSKKGSIDVE	43	59		-0.0255	0.2858	0.1762	0.2783	0.3391	0.271			DFERGRRGSKKGSIDVE	43	59	17
YEYDFERGRRGSKKGSIDVEKITC	40	63		0.1686	0.06	0.1528	0.4229	0.0934	0.614		YEYDFERGRRGSKKGSIDVEKITC	40	63		0.1686	0.06	0.1528	0.4229	0.0934	0.614			FERGRRGSKKGSID	44	57	14
FERGRRGSKKGSIDVE	44	59		-0.0496	-0.1317	0.1634	-0.1114	-0.1751	-0.0242		FERGRRGSKKGSIDVE	44	59		-0.0496	-0.1317	0.1634	-0.1114	-0.1751	-0.0242			FERGRRGSKKGSIDVE	44	59	16
FERGRRGSKKGSIDVEKITC	44	63		0.1348	0.2837	0.1376	0.282	0.194	0.285		FERGRRGSKKGSIDVEKITC	44	63		0.1348	0.2837	0.1376	0.282	0.194	0.285			FERGRRGSKKGSIDVEKITC	44	63	20
FERGRRGSKKGSIDVEKITCVE	44	65		0.2423	0.3512	0.6633	0.5428	0.4362			FERGRRGSKKGSIDVEKITCVE	44	65		0.2423	0.3512	0.6633	0.5428	0.4362	100			FERGRRGSKKGSIDVEKITCVE	44	65	22
VEKITCVE	58	65		0.0303	-0.0001	-0.0269	0.0491	0.0678	0.0886		VEKITCVE	58	65		0.0303	-0.0001	-0.0269	0.0491	0.0678	0.0886			VEKITCVE	58	65	8
VETVIPEKNPPPERQIPRRGEE	64	85		0.0184	0.078	0.375	0.1847	0.3259	0.3074		VETVIPEKNPPPERQIPRRGEE	64	85		0.0184	0.078	0.375	0.1847	0.3259	0.3074			VETVIPEKNPPPERQIPRRGEE	64	85	22
VETVIPEKNPPPERQIPRRGEES	64	86		0.0529	0.091	0.2994	0.2723	0.2738	0.382		VETVIPEKNPPPERQIPRRGEES	64	86		0.0529	0.091	0.2994	0.2723	0.2738	0.382			VETVIPEKNPPPERQIPRRGEES	64	86	23
TVIPEKNPPPERQIPRRGEE	66	85		0.0048	0.1392	0.2736	0.1645	0.2519	0.0453		TVIPEKNPPPERQIPRRGEE	66	85		0.0048	0.1392	0.2736	0.1645	0.2519	0.0453			VETVIPEKNPPPERQIPRRGEESSE	64	88	25
VETVIPEKNPPPERQIPRRGEESSE	64	88		-0.1084	0.093	0.2325	0.2308	0.2652	0.2602		VETVIPEKNPPPERQIPRRGEESSE	64	88		-0.1084	0.093	0.2325	0.2308	0.2652	0.2602			VETVIPEKNPPPERQIPRRGEESSEM	64	89	26
TVIPEKNPPPERQIPRRGEES	66	86		-0.4894	0.2762	0.3235	0.1885	0.2406	0.1505		TVIPEKNPPPERQIPRRGEES	66	86		-0.4894	0.2762	0.3235	0.1885	0.2406	0.1505			TVIPEKNPPPERQIPRRGEE	66	85	20
VETVIPEKNPPPERQIPRRGEESSEM	64	89		-0.1609	0.2174	0.1735	0.0861	0.2116	0.4036		VETVIPEKNPPPERQIPRRGEESSEM	64	89		-0.1609	0.2174	0.1735	0.0861	0.2116	0.4036			TVIPEKNPPPERQIPRRGEES	66	86	21
TVIPEKNPPPERQIPRRGEESSE	66	88		-0.0139	0.1382	0.2195	0.2018	0.145	0.2349		TVIPEKNPPPERQIPRRGEESSE	66	88		-0.0139	0.1382	0.2195	0.2018	0.145	0.2349			TVIPEKNPPPERQIPRRGEESSE	66	88	23
TVIPEKNPPPERQIPRRGEESSEM	66	89		-0.1846	0.098	0.2364	0.1663	0.1691	0.3976		TVIPEKNPPPERQIPRRGEESSEM	66	89		-0.1846	0.098	0.2364	0.1663	0.1691	0.3976			TVIPEKNPPPERQIPRRGEESSEM	66	89	24
ISIIERFPYPFQ	92	103		-0.0192	0.0011	-0.0764	-0.0281	0.0121	0.0011		ISIIERFPYPFQ	92	103		-0.0192	0.0011	-0.0764	-0.0281	0.0121	0.0011			ISIIERFPYPFQ	92	103	12
IIERFPYPFQVVY	94	106		-0.1131	-0.0257	0.0749	0.0734	0.0555	0.1574		IIERFPYPFQVVY	94	106		-0.1131	-0.0257	0.0749	0.0734	0.0555	0.1574			IIERFPYPFQVVY	94	106	13
IERFPYPFQVVY	95	106		0.102	0.0468	-0.0656	-0.0734	0.2571	0.0719		IERFPYPFQVVY	95	106		0.102	0.0468	-0.0656	-0.0734	0.2571	0.0719			IERFPYPFQVVY	95	106	12
VVYDEGPL	104	111		0.0307	0.0335	-0.0581	0.0275	0.0114	0.0862		VVYDEGPL	104	111		0.0307	0.0335	-0.0581	0.0275	0.0114	0.0862			VVYDEGPL	104	111	8
VVYDEGPLY	104	112		0.0511	0.0339	-0.0621	0.0535	0.0191	0.0376		VVYDEGPLY	104	112		0.0511	0.0339	-0.0621	0.0535	0.0191	0.0376			VVYDEGPLY	104	112	9
VVYDEGPLYVF	104	114		0.0452	0.0208	-0.0459	0.0602	0.1158	0.1742		VVYDEGPLYVF	104	114		0.0452	0.0208	-0.0459	0.0602	0.1158	0.1742			VVYDEGPLYVF	104	114	11
DEGPLYV	107	113		0.0374	-0.0123	-0.0658	-0.0319	-0.0371	-0.0248		DEGPLYV	107	113		0.0374	-0.0123	-0.0658	-0.0319	-0.0371	-0.0248			VVYDEGPLYVFSPTEE	104	119	16
VVYDEGPLYVFSPTEE	104	119		-0.056	0.0405	0.0899	0.0502	0.0694	0.1381		VVYDEGPLYVFSPTEE	104	119		-0.056	0.0405	0.0899	0.0502	0.0694	0.1381			VVYDEGPLYVFSPTEEL	104	120	17
VVYDEGPLYVFSPTEEL	104	120		-0.0922	-0.0152	0.0417	0.0717	0.0947	0.1719		VVYDEGPLYVFSPTEEL	104	120		-0.0922	-0.0152	0.0417	0.0717	0.0947	0.1719			VVYDEGPLYVFSPTEELRKRWIHQLKN	104	130	27
DEGPLYVFSPTEE	107	119		-0.0517	-0.0748	-0.1994	-0.0066	0.1378	0.2055		DEGPLYVFSPTEE	107	119		-0.0517	-0.0748	-0.1994	-0.0066	0.1378	0.2055			DEGPLYV	107	113	7
YVFSPTEE	112	119		0.0028	0.036	-0.024	0.0322	0.0328	0.0845		YVFSPTEE	112	119		0.0028	0.036	-0.024	0.0322	0.0328	0.0845			DEGPLYVFSPTEE	107	119	13
VVYDEGPLYVFSPTEELRKRWIHQLKN	104	130		0.0513	0.0373	-0.1784	-0.0625	-0.1052	0.0301		VVYDEGPLYVFSPTEELRKRWIHQLKN	104	130		0.0513	0.0373	-0.1784	-0.0625	-0.1052	0.0301			YVFSPTEE	112	119	8
LRKRWIHQLKN	120	130		0.1035	0.0766	-0.0078	0.0691	0.053	0.1101		LRKRWIHQLKN	120	130		0.1035	0.0766	-0.0078	0.0691	0.053	0.1101			LRKRWIHQLKN	120	130	11
LRKRWIHQLKNVIRY	120	134		-0.2701	0.1689	0.1408	0.0482	-0.0664	-0.2256		LRKRWIHQLKNVIRY	120	134		-0.2701	0.1689	0.1408	0.0482	-0.0664	-0.2256			LRKRWIHQLKNVIRY	120	134	15
VIRYNSDL	131	138		0.0769	-0.097	0.0908	-0.029	-0.0106	0.0511		VIRYNSDL	131	138		0.0769	-0.097	0.0908	-0.029	-0.0106	0.0511			VIRYNSDL	131	138	8
LVQKYHPCF	138	146		-0.0015	0.1143	-0.1121	0.0149	-0.0605	0.1191		LVQKYHPCF	138	146		-0.0015	0.1143	-0.1121	0.0149	-0.0605	0.1191			LVQKYHPCF	138	146	9
VQKYHPCF	139	146		-0.0454	-0.0328	-0.0406	0.007	-0.0092	0.0036		VQKYHPCF	139	146		-0.0454	-0.0328	-0.0406	0.007	-0.0092	0.0036			VQKYHPCF	139	146	8
QKYHPCF	140	146		0.018	-0.0127	-0.0249	0.0419	0.0408	0.043		QKYHPCF	140	146		0.018	-0.0127	-0.0249	0.0419	0.0408	0.043			QKYHPCF	140	146	7
WIDGQYL	147	153		0.0424	0.0193	0.0112	0.0045	-0.0028	0.0227		WIDGQYL	147	153		0.0424	0.0193	0.0112	0.0045	-0.0028	0.0227			WIDGQYL	147	153	7
WIDGQYLC	147	154		0.0341	0.0282	0.0689	0.0793	0.0593	0.0104		WIDGQYLC	147	154		0.0341	0.0282	0.0689	0.0793	0.0593	0.0104			WIDGQYLC	147	154	8
LCCSQTAKNAMG	153	164		0.0277	0.0513	0.1342	0.1226	0.1269	0.1493		LCCSQTAKNAMG	153	164		0.0277	0.0513	0.1342	0.1226	0.1269	0.1493			LCCSQTAKNAMG	153	164	12
LCCSQTAKNAMGCQ	153	166		0.0873	-0.0874	-0.0828	0.0052	-0.0511	0.1583		LCCSQTAKNAMGCQ	153	166		0.0873	-0.0874	-0.0828	0.0052	-0.0511	0.1583			LCCSQTAKNAMGCQ	153	166	14
CCSQTAKNAMGCQ	154	166		0.0154	0.0513	0.1586	-0.0356	-0.1643	0.1859		CCSQTAKNAMGCQ	154	166		0.0154	0.0513	0.1586	-0.0356	-0.1643	0.1859			CCSQTAKNAMGCQ	154	166	13
SQTAKNAMGC	156	165		0.0645	-0.1101	0.0755	0.1006	-0.0074	0.0366		SQTAKNAMGC	156	165		0.0645	-0.1101	0.0755	0.1006	-0.0074	0.0366			SQTAKNAMGC	156	165	10
SQTAKNAMGCQ	156	166		0.056	-0.0336	0.0849	0.0662	0.0006	0.1585		SQTAKNAMGCQ	156	166		0.056	-0.0336	0.0849	0.0662	0.0006	0.1585			SQTAKNAMGCQ	156	166	11
TAKNAMGCQ	158	166		0.0554	0.0035	0.1313	0.0418	0.0743	0.0836		TAKNAMGCQ	158	166		0.0554	0.0035	0.1313	0.0418	0.0743	0.0836			TAKNAMGCQ	158	166	9
ILENRNGSLKPGSS	167	180		0.0356	0.0235	0.1381	0.0902	0.124	0.1687		ILENRNGSLKPGSS	167	180		0.0356	0.0235	0.1381	0.0902	0.124	0.1687			ILENRNGSLKPGSS	167	180	14
LENRNGSLKPGSS	168	180		0.1282	0.0965	0.2289	0.143	0.129	0.1735		LENRNGSLKPGSS	168	180		0.1282	0.0965	0.2289	0.143	0.129	0.1735			ILENRNGSLKPGSSHRKTKKPLPPTPEE	167	194	28
ILENRNGSLKPGSSHRKTKKPLPPTPEE	167	194		0.0617	0.1875	0.2294	0.4402	0.1968	0.2836		ILENRNGSLKPGSSHRKTKKPLPPTPEE	167	194		0.0617	0.1875	0.2294	0.4402	0.1968	0.2836			LENRNGSLKPGSS	168	180	13
ENRNGSLKPGSSHRKTKKPLPPTPEE	169	194		-0.3057	-0.1553	0.0245	0.0309	-0.1992	0.1421		ENRNGSLKPGSSHRKTKKPLPPTPEE	169	194		-0.3057	-0.1553	0.0245	0.0309	-0.1992	0.1421			ENRNGSLKPGSSHRKTKKPLPPTPEE	169	194	26
DQILKKPLPPEPTAAPIST	195	213		-0.1666	-0.1786	-0.0625	-0.0142	0.056	-0.0196		DQILKKPLPPEPTAAPIST	195	213		-0.1666	-0.1786	-0.0625	-0.0142	0.056	-0.0196			DQILKKPLPPEPTAAPIST	195	213	19
QILKKPLPPEPTAAPIST	196	213		-0.0248	-0.0903	0.0237	-0.0478	0.0306	-0.0271		QILKKPLPPEPTAAPIST	196	213		-0.0248	-0.0903	0.0237	-0.0478	0.0306	-0.0271			DQILKKPLPPEPTAAPISTTE	195	215	21
DQILKKPLPPEPTAAPISTTE	195	215		-0.0422	-0.1717	0.1867	0.0079	0.0468	-0.0513		DQILKKPLPPEPTAAPISTTE	195	215		-0.0422	-0.1717	0.1867	0.0079	0.0468	-0.0513			DQILKKPLPPEPTAAPISTTEL	195	216	22
ILKKPLPPEPTAAPIST	197	213		0.035	-0.2018	0.0128	-0.0303	0.0567	0.001		ILKKPLPPEPTAAPIST	197	213		0.035	-0.2018	0.0128	-0.0303	0.0567	0.001			QILKKPLPPEPTAAPIST	196	213	18
DQILKKPLPPEPTAAPISTTEL	195	216		-0.2742	-0.0153	0.0728	-0.0619	0.1924	0.0682		DQILKKPLPPEPTAAPISTTEL	195	216		-0.2742	-0.0153	0.0728	-0.0619	0.1924	0.0682			QILKKPLPPEPTAAPISTTE	196	215	20
QILKKPLPPEPTAAPISTTE	196	215		-0.1531	-0.1436	0.003	0.0232	-0.0257	0.0254		QILKKPLPPEPTAAPISTTE	196	215		-0.1531	-0.1436	0.003	0.0232	-0.0257	0.0254			ILKKPLPPEPTAAPIST	197	213	17
LKKPLPPEPTAAPIST	198	213		-0.0238	-0.1016	0.0313	0.043	-0.0024	0.0186		LKKPLPPEPTAAPIST	198	213		-0.0238	-0.1016	0.0313	0.043	-0.0024	0.0186			ILKKPLPPEPTAAPISTTE	197	215	19
ILKKPLPPEPTAAPISTTE	197	215		-0.0546	-0.1118	0.0326	-0.0266	0.035	-0.0768		ILKKPLPPEPTAAPISTTE	197	215		-0.0546	-0.1118	0.0326	-0.0266	0.035	-0.0768			LKKPLPPEPTAAPIST	198	213	16
LKKVVAL	216	222		0.001	0.0201	-0.0096	0.033	0.137	0.0764		LKKVVAL	216	222		0.001	0.0201	-0.0096	0.033	0.137	0.0764			LKKVVAL	216	222	7
YDYMPMNA	223	230		0.081	-0.061	-0.0035	-0.0209	0.0047	0.0109		YDYMPMNA	223	230		0.081	-0.061	-0.0035	-0.0209	0.0047	0.0109			LYDYMPMNAND	222	232	11
LYDYMPMNAND	222	232		-0.0328	0.0014	-0.0269	0.0725	0.1014	0.1301		LYDYMPMNAND	222	232		-0.0328	0.0014	-0.0269	0.0725	0.1014	0.1301			YDYMPMNA	223	230	8
YDYMPMNAND	223	232		0.0798	0.0083	-0.0197	0.0423	0.0605	0.0248		YDYMPMNAND	223	232		0.0798	0.0083	-0.0197	0.0423	0.0605	0.0248			YDYMPMNAND	223	232	10
NDLQLRKGEEY	231	241		0.0687	0.008	0.0312	0.1834	0.222	0.1496		NDLQLRKGEEY	231	241		0.0687	0.008	0.0312	0.1834	0.222	0.1496			NDLQLRKGEEY	231	241	11
LQLRKGEE	233	240		0.0668	0.0706	0.0681	0.1526	0.1083	0.2876		LQLRKGEE	233	240		0.0668	0.0706	0.0681	0.1526	0.1083	0.2876			LQLRKGEE	233	240	8
LQLRKGEEY	233	241		-0.0606	-0.019	-0.0231	0.0595	0.053	0.1226		LQLRKGEEY	233	241		-0.0606	-0.019	-0.0231	0.0595	0.053	0.1226			LQLRKGEEY	233	241	9
QLRKGEE	234	240		0.0674	0.049	0.0088	0.1278	0.165	0.2668		QLRKGEE	234	240		0.0674	0.049	0.0088	0.1278	0.165	0.2668			LQLRKGEEYF	233	242	10
LQLRKGEEYF	233	242		0.1383	0.0791	0.0145	0.194	0.2372	0.2566		LQLRKGEEYF	233	242		0.1383	0.0791	0.0145	0.194	0.2372	0.2566			QLRKGEE	234	240	7
QLRKGEEY	234	241		0.0497	-0.0132	0.0294	0.0557	0.1746	0.1724		QLRKGEEY	234	241		0.0497	-0.0132	0.0294	0.0557	0.1746	0.1724			QLRKGEEY	234	241	8
RKGEEYF	236	242		0.0386	-0.0098	0.0189	0.0224	0.0176	0.2295		RKGEEYF	236	242		0.0386	-0.0098	0.0189	0.0224	0.0176	0.2295			RKGEEYF	236	242	7
ILEESNLPWWRARDKNGQE	243	261		0.2401	0.0703	0.1614	0.1471	0.2648	0.2562		ILEESNLPWWRARDKNGQE	243	261		0.2401	0.0703	0.1614	0.1471	0.2648	0.2562			ILEESNLPWWRARDKNGQE	243	261	19
ILEESNLPWWRARDKNGQEGYIPSN	243	267		0.2495	0.1191	0.1483	0.1767	0.3997	0.2224		ILEESNLPWWRARDKNGQEGYIPSN	243	267		0.2495	0.1191	0.1483	0.1767	0.3997	0.2224			ILEESNLPWWRARDKNGQEGYIPSN	243	267	25
ILEESNLPWWRARDKNGQEGYIPSNY	243	268		0.2398	0.0231	0.0567	0.2697	0.2329	0.1067		ILEESNLPWWRARDKNGQEGYIPSNY	243	268		0.2398	0.0231	0.0567	0.2697	0.2329	0.1067			ILEESNLPWWRARDKNGQEGYIPSNY	243	268	26
EESNLPWWRARDKNGQEGYIPSN	245	267		0.2998	0.1741	0.1916	0.2679	0.1393	0.4172		EESNLPWWRARDKNGQEGYIPSN	245	267		0.2998	0.1741	0.1916	0.2679	0.1393	0.4172			EESNLPWWRARDKNGQEGYIPSN	245	267	23
EESNLPWWRARDKNGQEGYIPSNY	245	268		0.2328	0.1522	0.1119	0.2402	0.2034	0.2449		EESNLPWWRARDKNGQEGYIPSNY	245	268		0.2328	0.1522	0.1119	0.2402	0.2034	0.2449			EESNLPWWRARDKNGQEGYIPSNY	245	268	24
ESNLPWWRARDKNGQEGYIPSNY	246	268		0.226	0.1019	0.1162	0.2811	0.2165	0.2267		ESNLPWWRARDKNGQEGYIPSNY	246	268		0.226	0.1019	0.1162	0.2811	0.2165	0.2267			ESNLPWWRARDKNGQEGYIPSNY	246	268	23
SNLPWWRARDKNGQEGYIPSN	247	267		0.2591	0.285	0.5897	0.54	0.7774	0.2358		SNLPWWRARDKNGQEGYIPSN	247	267		0.2591	0.285	0.5897	0.54	0.7774	0.2358			SNLPWWRARDKNGQEGYIPSN	247	267	21
SNLPWWRARDKNGQEGYIPSNY	247	268		0.2043	0.1021	0.0966	0.272	0.3712	0.2048		SNLPWWRARDKNGQEGYIPSNY	247	268		0.2043	0.1021	0.0966	0.272	0.3712	0.2048			SNLPWWRARDKNGQEGYIPSNY	247	268	22
GYIPSNY	262	268		0.031	-0.0184	-0.0417	0.033	0.1261	0.1531		GYIPSNY	262	268		0.031	-0.0184	-0.0417	0.033	0.1261	0.1531			GYIPSNY	262	268	7
AEDSIEM	272	278		0.0797	0.0534	0.0986	0.0856	0.0494	0.0966		AEDSIEM	272	278		0.0797	0.0534	0.0986	0.0856	0.0494	0.0966			AEDSIEM	272	278	7
YEWYSKHMTRSQAEQL	279	294		0.2607	0.3425	0.26	0.3669	0.3273	0.425		YEWYSKHMTRSQAEQL	279	294		0.2607	0.3425	0.26	0.3669	0.3273	0.425			YEWYSKHMTRSQAEQL	279	294	16
YEWYSKHMTRSQAEQLL	279	295		0.2688	0.2121	0.2786	0.0734	0.3733	-0.199		YEWYSKHMTRSQAEQLL	279	295		0.2688	0.2121	0.2786	0.0734	0.3733	-0.199			YEWYSKHMTRSQAEQLL	279	295	17
WYSKHMTRSQAEQL	281	294		0.2601	0.2391	0.2628	0.3876	0.2216	0.0718		WYSKHMTRSQAEQL	281	294		0.2601	0.2391	0.2628	0.3876	0.2216	0.0718			WYSKHMTRSQAEQL	281	294	14
YSKHMTRSQAEQ	282	293		0.1419	0.0624	0.2153	0.1595	0.2299	0.0654		YSKHMTRSQAEQ	282	293		0.1419	0.0624	0.2153	0.1595	0.2299	0.0654			YSKHMTRSQAEQ	282	293	12
YSKHMTRSQAEQL	282	294		0.2305	0.2355	0.2606	0.3426	0.2751	0.1289		YSKHMTRSQAEQL	282	294		0.2305	0.2355	0.2606	0.3426	0.2751	0.1289			YSKHMTRSQAEQL	282	294	13
LLKQEGKEGGF	294	304									LLKQEGKEGGF	294	304		100	100	100	100	100	100			LLKQEGKEGGF	294	304	11
IVRDSSKAGKY	305	315		-0.0409	0.0498	0.1766	0.0018	-0.0133	-0.0224		IVRDSSKAGKY	305	315		-0.0409	0.0498	0.1766	0.0018	-0.0133	-0.0224			IVRDSSKAGKY	305	315	11
VRDSSKAGKY	306	315		0.1343	0.1615	0.1596	0.0724	0.1779	0.159		VRDSSKAGKY	306	315		0.1343	0.1615	0.1596	0.0724	0.1779	0.159			IVRDSSKAGKYTVSV	305	319	15
FAKSTGEPQGVIRH	320	333		0.1424	0.1573	-0.0429	0.1791	0.177	0.2313		FAKSTGEPQGVIRH	320	333		0.1424	0.1573	-0.0429	0.1791	0.177	0.2313			VRDSSKAGKY	306	315	10
FAKSTGEPQGVIRHYVV	320	336		0.2131	0.1954	0.0093	0.1607	0.1418	0.1494		FAKSTGEPQGVIRHYVV	320	336		0.2131	0.1954	0.0093	0.1607	0.1418	0.1494			FAKSTGEPQGVIRH	320	333	14
FAKSTGEPQGVIRHYVVC	320	337		0.153	0.1107	0.1541	0.4096	0.0911	0.3852		FAKSTGEPQGVIRHYVVC	320	337		0.153	0.1107	0.1541	0.4096	0.0911	0.3852			FAKSTGEPQGVIRHYVV	320	336	17
AKSTGEPQGVIRHYVV	321	336		0.2132	0.0765	0.2716	0.0749	0.2035	0.1215		AKSTGEPQGVIRHYVV	321	336		0.2132	0.0765	0.2716	0.0749	0.2035	0.1215			FAKSTGEPQGVIRHYVVC	320	337	18
AKSTGEPQGVIRHYVVC	321	337		0.2656	0.1244	0.2741	0.3091	0.2292	0.2223		AKSTGEPQGVIRHYVVC	321	337		0.2656	0.1244	0.2741	0.3091	0.2292	0.2223			FAKSTGEPQGVIRHYVVCSTPQSQ	320	343	24
PQGVIRH	327	333		0.0507	-0.0675	0.1362	0.0767	0.0531	0.0902		PQGVIRH	327	333		0.0507	-0.0675	0.1362	0.0767	0.0531	0.0902			AKSTGEPQGVIRHYVV	321	336	16
FAKSTGEPQGVIRHYVVCSTPQSQ	320	343		0.3614	0.3766	0.4713	0.3797	0.4126	0.3865		FAKSTGEPQGVIRHYVVCSTPQSQ	320	343		0.3614	0.3766	0.4713	0.3797	0.4126	0.3865			AKSTGEPQGVIRHYVVC	321	337	17
PQGVIRHYVVC	327	337		0.2274	0.0989	0.1124	0.1649	0.1716	0.1312		PQGVIRHYVVC	327	337		0.2274	0.0989	0.1124	0.1649	0.1716	0.1312			PQGVIRH	327	333	7
YVVCSTPQSQ	334	343		0.1394	0.0937	0.0918	0.2076	0.1077	0.0025		YVVCSTPQSQ	334	343		0.1394	0.0937	0.0918	0.2076	0.1077	0.0025			PQGVIRHYVVC	327	337	11
YVVCSTPQSQY	334	344		0.1445	0.0919	0.0124	0.1645	0.0615	0.029		YVVCSTPQSQY	334	344		0.1445	0.0919	0.0124	0.1645	0.0615	0.029			YVVCSTPQSQ	334	343	10
CSTPQSQY	337	344		0.0809	0.1084	0.0871	0.0994	0.0554	0.0384		CSTPQSQY	337	344		0.0809	0.1084	0.0871	0.0994	0.0554	0.0384			YVVCSTPQSQY	334	344	11
STPQSQY	338	344		0.2633	0.1457	0.0241	0.0881	0.0661	0.0264		STPQSQY	338	344		0.2633	0.1457	0.0241	0.0881	0.0661	0.0264			CSTPQSQY	337	344	8
YYLAEKHLFSTI	344	355		0.1078	0.2337	0.1415	0.1988	0.1777	0.1083		YYLAEKHLFSTI	344	355		0.1078	0.2337	0.1415	0.1988	0.1777	0.1083			STPQSQY	338	344	7
YLAEKHLFSTI	345	355		0.1557	0.1884	0.0913	0.2253	0.1937	0.162		YLAEKHLFSTI	345	355		0.1557	0.1884	0.0913	0.2253	0.1937	0.162			YYLAEKHLFSTI	344	355	12
YYLAEKHLFSTIPEL	344	358		0.2063	0.1704	0.0878	0.2459	0.0604	0.0955		YYLAEKHLFSTIPEL	344	358		0.2063	0.1704	0.0878	0.2459	0.0604	0.0955			YYLAEKHLFSTIPEL	344	358	15
YLAEKHLFSTIPEL	345	358		0.1666	0.0607	-0.0022	0.0684	-0.0404	0.0191		YLAEKHLFSTIPEL	345	358		0.1666	0.0607	-0.0022	0.0684	-0.0404	0.0191			YLAEKHLFSTI	345	355	11
YLAEKHLFSTIPELINY	345	361		0.1844	-0.166	0.0295	0.1898	0.331	0.197		YLAEKHLFSTIPELINY	345	361		0.1844	-0.166	0.0295	0.1898	0.331	0.197			YLAEKHLFSTIPEL	345	358	14
FSTIPEL	352	358		0.0956	0.0077	-0.0346	0.022	-0.0114	0.0095		FSTIPEL	352	358		0.0956	0.0077	-0.0346	0.022	-0.0114	0.0095			YLAEKHLFSTIPELINY	345	361	17
INYHQHNSAGL	359	369		0.1091	0.102	0.1219	0.1425	0.0716	0.117		INYHQHNSAGL	359	369		0.1091	0.102	0.1219	0.1425	0.0716	0.117			FSTIPEL	352	358	7
NYHQHNSAGL	360	369		0.1003	0.0723	0.082	0.1115	0.0872	0.0677		NYHQHNSAGL	360	369		0.1003	0.0723	0.082	0.1115	0.0872	0.0677			INYHQHNSAGL	359	369	11
YHQHNSAGL	361	369		-0.0513	0.0523	0.0639	0.0569	0.1398	0.0565		YHQHNSAGL	361	369		-0.0513	0.0523	0.0639	0.0569	0.1398	0.0565			NYHQHNSAGL	360	369	10
ISRLKYPVSKQNKNAPST	370	387		0.0893	0.0556	0.04	0.2443	0.2032	0.5468		ISRLKYPVSKQNKNAPST	370	387		0.0893	0.0556	0.04	0.2443	0.2032	0.5468			YHQHNSAGL	361	369	9
ISRLKYPVSKQNKNAPSTAGL	370	390		0.2879	0.1851	0.3199	0.307	0.074	0.1181		ISRLKYPVSKQNKNAPSTAGL	370	390		0.2879	0.1851	0.3199	0.307	0.074	0.1181			ISRLKYPVSKQNKNAPST	370	387	18
ISRLKYPVSKQNKNAPSTAGLG	370	391		0.2278	0.2033	0.2013	0.1784	0.1127	-0.0127		ISRLKYPVSKQNKNAPSTAGLG	370	391		0.2278	0.2033	0.2013	0.1784	0.1127	-0.0127			ISRLKYPVSKQNKNAPSTAGL	370	390	21
ISRLKYPVSKQNKNAPSTAGLGY	370	392		0.3893	0.1974	0.2873	0.3077	0.1883			ISRLKYPVSKQNKNAPSTAGLGY	370	392		0.3893	0.1974	0.2873	0.3077	0.1883	100			ISRLKYPVSKQNKNAPSTAGLG	370	391	22
ISRLKYPVSKQNKNAPSTAGLGYGSW	370	395		0.0755	0.205	0.2856	0.1945	0.1092	-0.0868		ISRLKYPVSKQNKNAPSTAGLGYGSW	370	395		0.0755	0.205	0.2856	0.1945	0.1092	-0.0868			ISRLKYPVSKQNKNAPSTAGLGY	370	392	23
KQNKNAPSTAGLGYGSW	379	395		0.068	0.04	0.1206	0.137	0.1442	0.1498		KQNKNAPSTAGLGYGSW	379	395		0.068	0.04	0.1206	0.137	0.1442	0.1498			ISRLKYPVSKQNKNAPSTAGLGYGSW	370	395	26
EIDPKDLTF	396	404		0.0235	0.0501	0.0526	0.1311	0.0423	0.0379		EIDPKDLTF	396	404		0.0235	0.0501	0.0526	0.1311	0.0423	0.0379			KQNKNAPSTAGLGYGSW	379	395	17
EIDPKDLTFL	396	405		0.1849	0.1728	0.0784	0.1625	0.1113	0.0514		EIDPKDLTFL	396	405		0.1849	0.1728	0.0784	0.1625	0.1113	0.0514			EIDPKDLTF	396	404	9
DPKDLTF	398	404		0.1383	0.1385	0.1657	0.2006	0.1489	0.1736		DPKDLTF	398	404		0.1383	0.1385	0.1657	0.2006	0.1489	0.1736			EIDPKDLTFL	396	405	10
FLKELGTGQF	404	413		0.2905	0.2055	0.1	0.1476	0.1333	0.1485		FLKELGTGQF	404	413		0.2905	0.2055	0.1	0.1476	0.1333	0.1485			DPKDLTF	398	404	7
KELGTGQF	406	413		0.1181	-0.0197	0.0589	0.0189	0.0154	0.0413		KELGTGQF	406	413		0.1181	-0.0197	0.0589	0.0189	0.0154	0.0413			FLKELGTGQF	404	413	10
LKELGTGQFGVVKYGKWRGQY	405	425		0.5658	0.446	0.3509	0.5837	0.4201	0.3981		LKELGTGQFGVVKYGKWRGQY	405	425		0.5658	0.446	0.3509	0.5837	0.4201	0.3981			LKELGTGQFGVVKYGKWRGQY	405	425	21
GVVKYGKW	414	421		0.1793	0.2619	0.4537	0.4938	0.3763	0.1925		GVVKYGKW	414	421		0.1793	0.2619	0.4537	0.4938	0.3763	0.1925			KELGTGQF	406	413	8
GVVKYGKWRGQY	414	425		0.2362	0.4078	0.4958	0.5385	0.2728	0.1328		GVVKYGKWRGQY	414	425		0.2362	0.4078	0.4958	0.5385	0.2728	0.1328			GVVKYGKW	414	421	8
VKYGKWRGQY	416	425		0.1591	0.226	0.3462	0.3748	0.1836	0.0642		VKYGKWRGQY	416	425		0.1591	0.226	0.3462	0.3748	0.1836	0.0642			GVVKYGKWRGQY	414	425	12
GVVKYGKWRGQYDVA	414	428		0.1001	0.3449	0.4388	0.3934	0.3322	0.5649		GVVKYGKWRGQYDVA	414	428		0.1001	0.3449	0.4388	0.3934	0.3322	0.5649			GVVKYGKWRGQYDVA	414	428	15
KYGKWRGQY	417	425		0.1556	0.2549	0.361	0.3657	0.1771	0.139		KYGKWRGQY	417	425		0.1556	0.2549	0.361	0.3657	0.1771	0.139			VKYGKWRGQY	416	425	10
IREGSMSE	432	439		0.1778	0.1057	0.1282	0.1146	0.1376	0.1603		IREGSMSE	432	439		0.1778	0.1057	0.1282	0.1146	0.1376	0.1603			KYGKWRGQY	417	425	9
IREGSMSED	432	440		0.0662	0.3686	0.3037	0.3283	0.2352	0.2149		IREGSMSED	432	440		0.0662	0.3686	0.3037	0.3283	0.2352	0.2149			IREGSMSE	432	439	8
IREGSMSEDE	432	441		0.1656	0.1928	0.1795	0.2023	0.2097	0.1257		IREGSMSEDE	432	441		0.1656	0.1928	0.1795	0.2023	0.2097	0.1257			IREGSMSED	432	440	9
IREGSMSEDEF	432	442		0.1799	0.1997	0.134	0.1482	0.1343	0.2733		IREGSMSEDEF	432	442		0.1799	0.1997	0.134	0.1482	0.1343	0.2733			IREGSMSEDE	432	441	10
IEEAKVMMNLSHEKL	443	457		0.4494	0.0372	-0.2121	0.0995	0.2038	0.2141		IEEAKVMMNLSHEKL	443	457		0.4494	0.0372	-0.2121	0.0995	0.2038	0.2141			IREGSMSEDEF	432	442	11
AKVMMNLSHEKL	446	457		0.1935	0.1115	0.1629	0.1713	0.1541	0.2401		AKVMMNLSHEKL	446	457		0.1935	0.1115	0.1629	0.1713	0.1541	0.2401			IEEAKVMMNLSHEKL	443	457	15
KVMMNLSHEKL	447	457		0.116	0.0823	0.068	0.1079	-0.0053	0.0549		KVMMNLSHEKL	447	457		0.116	0.0823	0.068	0.1079	-0.0053	0.0549			AKVMMNLSHEKL	446	457	12
MNLSHEKL	450	457		0.0822	0.0402	0.0715	0.1601	0.1786	0.0969		MNLSHEKL	450	457		0.0822	0.0402	0.0715	0.1601	0.1786	0.0969			KVMMNLSHEKL	447	457	11
NLSHEKL	451	457		0.1323	0.0881	0.0972	0.1188	0.123	0.1512		NLSHEKL	451	457		0.1323	0.0881	0.0972	0.1188	0.123	0.1512			MNLSHEKL	450	457	8
GVCTKQRPIF	462	471		0.0789	0.0785	0.0339	0.0944	0.125	0.1562		GVCTKQRPIF	462	471		0.0789	0.0785	0.0339	0.0944	0.125	0.1562			NLSHEKL	451	457	7
YGVCTKQRPIFIIT	461	474		0.0827	0.0395	0.1037	0.1165	0.0843	0.1205		YGVCTKQRPIFIIT	461	474		0.0827	0.0395	0.1037	0.1165	0.0843	0.1205			YGVCTKQRPIFIIT	461	474	14
YGVCTKQRPIFIITE	461	475		0.1875	0.0924	0.0846	0.1226	0.073	0.1487		YGVCTKQRPIFIITE	461	475		0.1875	0.0924	0.0846	0.1226	0.073	0.1487			YGVCTKQRPIFIITE	461	475	15
TKQRPIF	465	471		0.1051	0.1091	0.0798	0.1402	0.1981	0.1538		TKQRPIF	465	471		0.1051	0.1091	0.0798	0.1402	0.1981	0.1538			GVCTKQRPIF	462	471	10
TKQRPIFIIT	465	474		-0.0069	-0.0801	0.0447	0.1168	0.1333	0.247		TKQRPIFIIT	465	474		-0.0069	-0.0801	0.0447	0.1168	0.1333	0.247			TKQRPIF	465	471	7
EYMANGCL	475	482									EYMANGCL	475	482		100	100	100	100	100	100			TKQRPIFIIT	465	474	10
YMANGCL	476	482									YMANGCL	476	482		100	100	100	100	100	100			EYMANGCL	475	482	8
YMANGCLL	476	483									YMANGCLL	476	483		100	100	100	100	100	100			YMANGCL	476	482	7
MANGCLL	477	483									MANGCLL	477	483		100	100	100	100	100	100			YMANGCLL	476	483	8
LREMRHRFQTQQL	486	498		-0.0458	-0.0568	0.0098	0.0144	-0.0249	0.0807		LREMRHRFQTQQL	486	498		-0.0458	-0.0568	0.0098	0.0144	-0.0249	0.0807			MANGCLL	477	483	7
MRHRFQTQQL	489	498		0.1477	0.1191	0.0957	0.1768	0.1857	0.1764		MRHRFQTQQL	489	498		0.1477	0.1191	0.0957	0.1768	0.1857	0.1764			LREMRHRFQTQQL	486	498	13
MCKDVCE	501	507		0.0072	0.0099	0.0316	-0.0127	-0.0073	0.0162		MCKDVCE	501	507		0.0072	0.0099	0.0316	-0.0127	-0.0073	0.0162			MRHRFQTQQL	489	498	10
MCKDVCEA	501	508		-0.0368	-0.0578	-0.0159	-0.0225	0.0099	-0.1468		MCKDVCEA	501	508		-0.0368	-0.0578	-0.0159	-0.0225	0.0099	-0.1468			MCKDVCE	501	507	7
CKDVCEA	502	508		0.0308	0.0095	0.0206	0.0566	0.0511	0.0636		CKDVCEA	502	508		0.0308	0.0095	0.0206	0.0566	0.0511	0.0636			MCKDVCEA	501	508	8
MEYLESKQFL	509	518		0.2454	0.088	0.0328	0.0662	0.0328	0.0704		MEYLESKQFL	509	518		0.2454	0.088	0.0328	0.0662	0.0328	0.0704			CKDVCEA	502	508	7
EYLESKQFL	510	518		0.0898	0.0404	-0.0096	0.0494	0.0401	0.0718		EYLESKQFL	510	518		0.0898	0.0404	-0.0096	0.0494	0.0401	0.0718			MEYLESKQFL	509	518	10
YLESKQFL	511	518		0.0208	0.0351	0.0381	0.068	0.073	0.0725		YLESKQFL	511	518		0.0208	0.0351	0.0381	0.068	0.073	0.0725			EYLESKQFL	510	518	9
EYLESKQFLHRDLAARNCL	510	528		0.2704	0.0234	0.0454	0.1412	0.2534	0.4047		EYLESKQFLHRDLAARNCL	510	528		0.2704	0.0234	0.0454	0.1412	0.2534	0.4047			EYLESKQFLHRDLAARNCL	510	528	19
YLESKQFLHRDLAARNCL	511	528		0.1125	0.0056	0.0207	0.1063	0.2014	0.3484		YLESKQFLHRDLAARNCL	511	528		0.1125	0.0056	0.0207	0.1063	0.2014	0.3484			YLESKQFL	511	518	8
FLHRDLAA	517	524		0.0066	-0.0021	-0.0338	0.0163	0.1652	0.1498		FLHRDLAA	517	524		0.0066	-0.0021	-0.0338	0.0163	0.1652	0.1498			YLESKQFLHRDLAARNCL	511	528	18
FLHRDLAARN	517	526		0.1329	0.0772	-0.1039	0.1645	0.2776	0.3029		FLHRDLAARN	517	526		0.1329	0.0772	-0.1039	0.1645	0.2776	0.3029			FLHRDLAA	517	524	8
FLHRDLAARNCL	517	528		0.0676	0.0434	-0.0126	0.0265	-0.2181	0.1612		FLHRDLAARNCL	517	528		0.0676	0.0434	-0.0126	0.0265	-0.2181	0.1612			FLHRDLAARN	517	526	10
HRDLAARN	519	526		0.1013	-0.0175	-0.0887	0.1187	0.0833	0.2306		HRDLAARN	519	526		0.1013	-0.0175	-0.0887	0.1187	0.0833	0.2306			FLHRDLAARNCL	517	528	12
HRDLAARNCL	519	528		0.0899	0.0536	0.0641	0.1542	0.1487	0.2771		HRDLAARNCL	519	528		0.0899	0.0536	0.0641	0.1542	0.1487	0.2771			HRDLAARN	519	526	8
RNCLVNDQGVVKVSDF	525	540		0.1584	0.1557	-0.0239	0.0965	0.173	0.3237		RNCLVNDQGVVKVSDF	525	540		0.1584	0.1557	-0.0239	0.0965	0.173	0.3237			HRDLAARNCL	519	528	10
CLVNDQGVVKVSD	527	539		0.215	0.2051	0.0997	0.1306	0.1804	0.2622		CLVNDQGVVKVSD	527	539		0.215	0.2051	0.0997	0.1306	0.1804	0.2622			RNCLVNDQGVVKVSDF	525	540	16
CLVNDQGVVKVSDF	527	540		0.1168	0.0768	-0.0073	0.0818	0.1635	0.1924		CLVNDQGVVKVSDF	527	540		0.1168	0.0768	-0.0073	0.0818	0.1635	0.1924			CLVNDQGVVKVSD	527	539	13
LVNDQGVVKVSDF	528	540									LVNDQGVVKVSDF	528	540		100	100	100	100	100	100			CLVNDQGVVKVSDF	527	540	14
VNDQGVVKVSD	529	539		0.0713	0.0525	0.0283	0.0896	0.1429	0.1308		VNDQGVVKVSD	529	539		0.0713	0.0525	0.0283	0.0896	0.1429	0.1308			CLVNDQGVVKVSDFGL	527	542	16
CLVNDQGVVKVSDFGL	527	542		0.1281	0.2112	0.1477	0.1513	0.1569	0.1743		CLVNDQGVVKVSDFGL	527	542		0.1281	0.2112	0.1477	0.1513	0.1569	0.1743			LVNDQGVVKVSDF	528	540	13
VNDQGVVKVSDF	529	540		0.0002	-0.0256	-0.0874	0.0091	0.0797	0.0585		VNDQGVVKVSDF	529	540		0.0002	-0.0256	-0.0874	0.0091	0.0797	0.0585			VNDQGVVKVSD	529	539	11
VNDQGVVKVSDFGL	529	542		0.176	0.1312	0.0192	0.0592	0.1569	0.1743		VNDQGVVKVSDFGL	529	542		0.176	0.1312	0.0192	0.0592	0.1569	0.1743			VNDQGVVKVSDF	529	540	12
VNDQGVVKVSDFGLS	529	543		0.0394	0.0618	0.042	-0.0354	0.1069	0.0983		VNDQGVVKVSDFGLS	529	543		0.0394	0.0618	0.042	-0.0354	0.1069	0.0983			VNDQGVVKVSDFGL	529	542	14
VNDQGVVKVSDFGLSR	529	544				0.1711	-0.003	0.1056	0.2339		VNDQGVVKVSDFGLSR	529	544		100	100	0.1711	-0.003	0.1056	0.2339			VNDQGVVKVSDFGLS	529	543	15
VNDQGVVKVSDFGLSRY	529	545		0.3422	0.4152	0.23	0.2378	0.4618	0.345		VNDQGVVKVSDFGLSRY	529	545		0.3422	0.4152	0.23	0.2378	0.4618	0.345			VNDQGVVKVSDFGLSR	529	544	16
VVKVSDF	534	540		0.0818	0.0861	0.0387	0.0953	0.1983	0.1268		VVKVSDF	534	540		0.0818	0.0861	0.0387	0.0953	0.1983	0.1268			VNDQGVVKVSDFGLSRY	529	545	17
VNDQGVVKVSDFGLSRYVL	529	547		0.5042	0.3101	0.0957	0.1719	0.106	0.1791		VNDQGVVKVSDFGLSRYVL	529	547		0.5042	0.3101	0.0957	0.1719	0.106	0.1791			VNDQGVVKVSDFGLSRYVL	529	547	19
VVKVSDFGL	534	542		0.109	0.1385	0.004	0.0899	0.1739	0.1847		VVKVSDFGL	534	542		0.109	0.1385	0.004	0.0899	0.1739	0.1847			VNDQGVVKVSDFGLSRYVLDD	529	549	21
VNDQGVVKVSDFGLSRYVLDD	529	549		0.44	0.313	0.4687	0.1713	0.1157	0.2502		VNDQGVVKVSDFGLSRYVLDD	529	549		0.44	0.313	0.4687	0.1713	0.1157	0.2502			VNDQGVVKVSDFGLSRYVLDDE	529	550	22
VNDQGVVKVSDFGLSRYVLDDE	529	550		0.5788	0.289	0.0297	0.1171	0.0021	0.3666		VNDQGVVKVSDFGLSRYVLDDE	529	550		0.5788	0.289	0.0297	0.1171	0.0021	0.3666			VVKVSDF	534	540	7
FGLSRYVL	540	547		0.2138	0.2264	0.1791	0.0311	0.0471	0.035		FGLSRYVL	540	547		0.2138	0.2264	0.1791	0.0311	0.0471	0.035			VVKVSDFGL	534	542	9
GLSRYVL	541	547		0.1685	0.1521	0.0883	0.0395	-0.0148	0.0057		GLSRYVL	541	547		0.1685	0.1521	0.0883	0.0395	-0.0148	0.0057			FGLSRYVL	540	547	8
FGLSRYVLDD	540	549		0.2866	0.2862	0.1638	0.0446	0.0151	0.1623		FGLSRYVLDD	540	549		0.2866	0.2862	0.1638	0.0446	0.0151	0.1623			FGLSRYVLDD	540	549	10
FGLSRYVLDDE	540	550		0.4265	0.1868	0.0488	-0.0528	0.2047	0.0797		FGLSRYVLDDE	540	550		0.4265	0.1868	0.0488	-0.0528	0.2047	0.0797			FGLSRYVLDDE	540	550	11
GLSRYVLDD	541	549		0.3076	0.1718	0.1923	0.1361	0.0349	0.0529		GLSRYVLDD	541	549		0.3076	0.1718	0.1923	0.1361	0.0349	0.0529			GLSRYVL	541	547	7
GLSRYVLDDE	541	550		0.2135	0.1753	-0.103	0.1191	0.2088	0.3584		GLSRYVLDDE	541	550		0.2135	0.1753	-0.103	0.1191	0.2088	0.3584			GLSRYVLDD	541	549	9
SRYVLDD	543	549		0.1471	0.1993	0.0915	0.0555	-0.0246	-0.0223		SRYVLDD	543	549		0.1471	0.1993	0.0915	0.0555	-0.0246	-0.0223			GLSRYVLDDE	541	550	10
SRYVLDDE	543	550		0.1784	0.0751	0.1098	0.0708	0.0236	0.0754		SRYVLDDE	543	550		0.1784	0.0751	0.1098	0.0708	0.0236	0.0754			SRYVLDD	543	549	7
EYTSSVGSKF	550	559		0.0685	0.0627	0.1454	0.1611	0.0781	0.1857		EYTSSVGSKF	550	559		0.0685	0.0627	0.1454	0.1611	0.0781	0.1857			SRYVLDDE	543	550	8
YTSSVGSKF	551	559		0.1389	0.1015	0.1603	0.0978	0.1811	0.2735		YTSSVGSKF	551	559		0.1389	0.1015	0.1603	0.0978	0.1811	0.2735			EYTSSVGSKF	550	559	10
TSSVGSKF	552	559		0.3131	-0.0859	-0.1162	0.0614	-0.0566	0.1127		TSSVGSKF	552	559		0.3131	-0.0859	-0.1162	0.0614	-0.0566	0.1127			EYTSSVGSKFPVRWSPPEVL	550	569	20
EYTSSVGSKFPVRWSPPEVL	550	569		0.1337	0.0096	0.078	0.1104	0.055	0.3351		EYTSSVGSKFPVRWSPPEVL	550	569		0.1337	0.0096	0.078	0.1104	0.055	0.3351			YTSSVGSKF	551	559	9
YTSSVGSKFPVRWSPPEVL	551	569		0.157	0.0546	0.0597	0.1357	0.057	0.0423		YTSSVGSKFPVRWSPPEVL	551	569		0.157	0.0546	0.0597	0.1357	0.057	0.0423			YTSSVGSKFPVRWSPPEVL	551	569	19
TSSVGSKFPVRWSPPEVL	552	569		0.151	0.1075	0.1093	0.1491	0.1948	0.1097		TSSVGSKFPVRWSPPEVL	552	569		0.151	0.1075	0.1093	0.1491	0.1948	0.1097			TSSVGSKF	552	559	8
PVRWSPPEVL	560	569		0.0672	0.0475	0.0772	0.1703	0.0521	-0.019		PVRWSPPEVL	560	569		0.0672	0.0475	0.0772	0.1703	0.0521	-0.019			TSSVGSKFPVRWSPPEVL	552	569	18
YSKFSSKSDI	571	580		0.0096	0.0745	0.0017	0.0814	0.0201	0.0229		YSKFSSKSDI	571	580		0.0096	0.0745	0.0017	0.0814	0.0201	0.0229			PVRWSPPEVL	560	569	10
MYSKFSSKSDIWA	570	582		0.1439	0.1404	0.0444	0.0731	-0.0033	0.2236		MYSKFSSKSDIWA	570	582		0.1439	0.1404	0.0444	0.0731	-0.0033	0.2236			MYSKFSSKSDIWA	570	582	13
MYSKFSSKSDIWAF	570	583		0.0776	0.0411	-0.0057	0.0052	-0.1565	-0.0719		MYSKFSSKSDIWAF	570	583		0.0776	0.0411	-0.0057	0.0052	-0.1565	-0.0719			MYSKFSSKSDIWAF	570	583	14
YSKFSSKSDIWA	571	582		0.0294	0.048	-0.0067	0.0911	0.0331	0.244		YSKFSSKSDIWA	571	582		0.0294	0.048	-0.0067	0.0911	0.0331	0.244			YSKFSSKSDI	571	580	10
YSKFSSKSDIWAF	571	583		0.0848	0.0475	-0.0031	0.0102	-0.0548	0.0287		YSKFSSKSDIWAF	571	583		0.0848	0.0475	-0.0031	0.0102	-0.0548	0.0287			YSKFSSKSDIWA	571	582	12
SSKSDIWA	575	582		0.0743	0.069	0.0513	0.0894	0.1004	0.1678		SSKSDIWA	575	582		0.0743	0.069	0.0513	0.0894	0.1004	0.1678			YSKFSSKSDIWAF	571	583	13
SSKSDIWAF	575	583		0.1007	0.089	0.0553	0.0737	0.0807	0.1173		SSKSDIWAF	575	583		0.1007	0.089	0.0553	0.0737	0.0807	0.1173			SSKSDIWA	575	582	8
MWEIYSL	587	593		0.0281	0.004	-0.0233	0.0338	0.0134	0.0149		MWEIYSL	587	593		0.0281	0.004	-0.0233	0.0338	0.0134	0.0149			SSKSDIWAF	575	583	9
WEIYSLGKM	588	596		0.1266	0.0015	0.0277	0.0497	-0.0541	0.0352		WEIYSLGKM	588	596		0.1266	0.0015	0.0277	0.0497	-0.0541	0.0352			MWEIYSL	587	593	7
WEIYSLGKMPYE	588	599		0.0355	-0.0342	-0.0567	0.0445	0.0804	-0.0031		WEIYSLGKMPYE	588	599		0.0355	-0.0342	-0.0567	0.0445	0.0804	-0.0031			MWEIYSLGKMPYERF	587	601	15
MWEIYSLGKMPYERF	587	601		0.0374	-0.0552	-0.1425	0.0195	-0.0472	0.0437		MWEIYSLGKMPYERF	587	601		0.0374	-0.0552	-0.1425	0.0195	-0.0472	0.0437			MWEIYSLGKMPYERFTNSE	587	605	19
WEIYSLGKMPYERF	588	601		0.028	-0.0023	0.0485	-0.0338	-0.0443	-0.0893		WEIYSLGKMPYERF	588	601		0.028	-0.0023	0.0485	-0.0338	-0.0443	-0.0893			WEIYSLGKM	588	596	9
IYSLGKMPYERF	590	601		0.055	0.053		0.0978	0.065	0.0647		IYSLGKMPYERF	590	601		0.055	0.053	100	0.0978	0.065	0.0647			WEIYSLGKMPYE	588	599	12
MWEIYSLGKMPYERFTNSE	587	605		0.1734	0.1541	0.0291	0.0696	0.1046	0.1921		MWEIYSLGKMPYERFTNSE	587	605		0.1734	0.1541	0.0291	0.0696	0.1046	0.1921			WEIYSLGKMPYERF	588	601	14
WEIYSLGKMPYERFTNS	588	604		0.095	0.0788	0.1035	0.0159	0.1198	0.1268		WEIYSLGKMPYERFTNS	588	604		0.095	0.0788	0.1035	0.0159	0.1198	0.1268			WEIYSLGKMPYERFTNS	588	604	17
WEIYSLGKMPYERFTNSE	588	605		0.098	0.0794	0.0389	0.0466	0.0712	0.0162		WEIYSLGKMPYERFTNSE	588	605		0.098	0.0794	0.0389	0.0466	0.0712	0.0162			WEIYSLGKMPYERFTNSE	588	605	18
SLGKMPYERF	592	601			-0.061	-0.0371	-0.0161	0.1112	0.0176		SLGKMPYERF	592	601		100	-0.061	-0.0371	-0.0161	0.1112	0.0176			WEIYSLGKMPYERFTNSETAE	588	608	21
IYSLGKMPYERFTNS	590	604		0.1022	-0.0381	0.0534	0.1197	0.0257	-0.0107		IYSLGKMPYERFTNS	590	604		0.1022	-0.0381	0.0534	0.1197	0.0257	-0.0107			IYSLGKMPYERF	590	601	12
IYSLGKMPYERFTNSE	590	605		0.1255	0.1631	0.2201	0.1278	0.1501	0.1849		IYSLGKMPYERFTNSE	590	605		0.1255	0.1631	0.2201	0.1278	0.1501	0.1849			IYSLGKMPYERFTNS	590	604	15
GKMPYERF	594	601		0.2628	0.0691	0.0197	0.1681	0.1232	0.1028		GKMPYERF	594	601		0.2628	0.0691	0.0197	0.1681	0.1232	0.1028			IYSLGKMPYERFTNSE	590	605	16
WEIYSLGKMPYERFTNSETAE	588	608		0.2647	0.0704	-0.0454	0.1754	-0.1199	-0.0154		WEIYSLGKMPYERFTNSETAE	588	608		0.2647	0.0704	-0.0454	0.1754	-0.1199	-0.0154			IYSLGKMPYERFTNSETAE	590	608	19
IYSLGKMPYERFTNSETAE	590	608		0.0471	0.3361	0.2537	0.0996	0.1874	0.2248		IYSLGKMPYERFTNSETAE	590	608		0.0471	0.3361	0.2537	0.0996	0.1874	0.2248			IYSLGKMPYERFTNSETAEHIA	590	611	22
GKMPYERFTNSE	594	605		0.0742	0.1797	0.3142	0.0717	0.1579	0.1743		GKMPYERFTNSE	594	605		0.0742	0.1797	0.3142	0.0717	0.1579	0.1743			SLGKMPYERF	592	601	10
IYSLGKMPYERFTNSETAEHIA	590	611		0.1419	0.035	0.3351	0.0538	0.1604	0.0173		IYSLGKMPYERFTNSETAEHIA	590	611		0.1419	0.035	0.3351	0.0538	0.1604	0.0173			GKMPYERF	594	601	8
GKMPYERFTNSETAE	594	608		0.1504	0.1615	0.0382	0.0643	0.0835	0.2424		GKMPYERFTNSETAE	594	608		0.1504	0.1615	0.0382	0.0643	0.0835	0.2424			GKMPYERFTNSE	594	605	12
RFTNSETAE	600	608		0.0375	0.1197	0.0786	-0.1052	0.0606	0.0509		RFTNSETAE	600	608		0.0375	0.1197	0.0786	-0.1052	0.0606	0.0509			GKMPYERFTNSETAE	594	608	15
TAEHIAQG	606	613		0.0909	0.1095	0.1464	0.0933	-0.0589	-0.021		TAEHIAQG	606	613		0.0909	0.1095	0.1464	0.0933	-0.0589	-0.021			RFTNSETAE	600	608	9
TAEHIAQGLRLPRPHL	606	621		0.1755	0.1133	0.1418	0.0424	0.0115	0.0737		TAEHIAQGLRLPRPHL	606	621		0.1755	0.1133	0.1418	0.0424	0.0115	0.0737			TAEHIAQG	606	613	8
AEHIAQGLRLPRPHL	607	621		0.0157	0.0853	0.1548	0.1684	0.0987	0.081		AEHIAQGLRLPRPHL	607	621		0.0157	0.0853	0.1548	0.1684	0.0987	0.081			TAEHIAQGLRLPRPHL	606	621	16
TAEHIAQGLRLPRPHLAS	606	623		0.1251	0.1078	0.1218	0.1246	0.1496	0.0444		TAEHIAQGLRLPRPHLAS	606	623		0.1251	0.1078	0.1218	0.1246	0.1496	0.0444			TAEHIAQGLRLPRPHLAS	606	623	18
TAEHIAQGLRLPRPHLASE	606	624		0.1228	0.0999	0.1418	0.1449	0.1161	0.2196		TAEHIAQGLRLPRPHLASE	606	624		0.1228	0.0999	0.1418	0.1449	0.1161	0.2196			TAEHIAQGLRLPRPHLASE	606	624	19
AEHIAQGLRLPRPHLAS	607	623		0.0999	0.0971	0.1826	0.1288	0.0786	-0.0358		AEHIAQGLRLPRPHLAS	607	623		0.0999	0.0971	0.1826	0.1288	0.0786	-0.0358			AEHIAQGLRLPRPHL	607	621	15
HIAQGLRLPRPHL	609	621		-0.0016	0.0275	0.0135	0.0444	-0.0099	0.0692		HIAQGLRLPRPHL	609	621		-0.0016	0.0275	0.0135	0.0444	-0.0099	0.0692			AEHIAQGLRLPRPHLAS	607	623	17
HIAQGLRLPRPHLAS	609	623		0.0404	0.0914	0.029	0.1052	0.0641	0.0144		HIAQGLRLPRPHLAS	609	623		0.0404	0.0914	0.029	0.1052	0.0641	0.0144			HIAQGLRLPRPHL	609	621	13
HIAQGLRLPRPHLASE	609	624		0.0375	0.101	0.2004	0.0379	0.0872	0.1288		HIAQGLRLPRPHLASE	609	624		0.0375	0.101	0.2004	0.0379	0.0872	0.1288			HIAQGLRLPRPHLAS	609	623	15
HIAQGLRLPRPHLASERV	609	626		0.1943	0.2144	0.1052	-0.0144	0.109	0.0391		HIAQGLRLPRPHLASERV	609	626		0.1943	0.2144	0.1052	-0.0144	0.109	0.0391			HIAQGLRLPRPHLASE	609	624	16
LRLPRPHLAS	614	623		0.0986	0.0652	-0.0131	0.1169	0.0801	0.1454		LRLPRPHLAS	614	623		0.0986	0.0652	-0.0131	0.1169	0.0801	0.1454			HIAQGLRLPRPHLASERV	609	626	18
LRLPRPHLASE	614	624		0.0501	0.0531	0.041	0.0868	0.0787	-0.0405		LRLPRPHLASE	614	624		0.0501	0.0531	0.041	0.0868	0.0787	-0.0405			LRLPRPHLAS	614	623	10
ERVYTIM	624	630		0.0927	0.0496	0.0089	0.005	0.0184	0.0434		ERVYTIM	624	630		0.0927	0.0496	0.0089	0.005	0.0184	0.0434			LRLPRPHLASE	614	624	11
YSCWHEKA	631	638		0.1593	-0.0296	0.109	0.1584	-0.0012	-0.0289		YSCWHEKA	631	638		0.1593	-0.0296	0.109	0.1584	-0.0012	-0.0289			ERVYTIM	624	630	7
SCWHEKA	632	638		0.1077	0.1998	0.0461	0.0802	0.0019	0.1189		SCWHEKA	632	638		0.1077	0.1998	0.0461	0.0802	0.0019	0.1189			YSCWHEKA	631	638	8
YSCWHEKADERPSF	631	644		0.0831	0.0548	0.036	0.1245	0.0552	0.2067		YSCWHEKADERPSF	631	644		0.0831	0.0548	0.036	0.1245	0.0552	0.2067			YSCWHEKADERPSF	631	644	14
SCWHEKADERPSF	632	644		0.1082	0.1105	0.0956	0.1831	0.1578	0.2532		SCWHEKADERPSF	632	644		0.1082	0.1105	0.0956	0.1831	0.1578	0.2532			SCWHEKA	632	638	7
CWHEKADERPSF	633	644		0.0755	0.1024	0.0831	0.1442	0.0992	0.2288		CWHEKADERPSF	633	644		0.0755	0.1024	0.0831	0.1442	0.0992	0.2288			SCWHEKADERPSF	632	644	13
WHEKADERPSF	634	644		0.18	0.1865	0.1265	0.1847	0.121	0.0708		WHEKADERPSF	634	644		0.18	0.1865	0.1265	0.1847	0.121	0.0708			CWHEKADERPSF	633	644	12
HEKADERPSF	635	644		0.1181	0.064	-0.013	0.0911	0.0723	0.0971		HEKADERPSF	635	644		0.1181	0.064	-0.013	0.0911	0.0723	0.0971			WHEKADERPSF	634	644	11
KILLSNIL	645	652		0.0625	-0.0041	-0.0222	0.017	0.0048	0.0299		KILLSNIL	645	652		0.0625	-0.0041	-0.0222	0.017	0.0048	0.0299			HEKADERPSF	635	644	10
KILLSNILD	645	653		0.0229	0.0141	-0.0144	-0.0027	0.0543	0.0058		KILLSNILD	645	653		0.0229	0.0141	-0.0144	-0.0027	0.0543	0.0058			KILLSNIL	645	652	8
KILLSNILDV	645	654		0.0023	0.0044	0.0258	0.0068	-0.0343	-0.0393		KILLSNILDV	645	654		0.0023	0.0044	0.0258	0.0068	-0.0343	-0.0393			KILLSNILD	645	653	9
																							KILLSNILDV	645	654	10
																										13.3347

## Sheet: Figure 8
Relative Difference in Deuterium Incorporation All peptides												Relative Difference in Deuterium Incorporation peptides included in Figure 5
				T316A:Ibr-T316A												T3167AIbr-T316A										T3167AIbr-T316A
Sequence	Start	End		10 sec	1 min	5 min	10 min	1 hour	4 hours			Sequence	Start	End		10 sec	1 min	10min	1 hour	4 hours		Sequence	Start	End		10 sec	1 min	10min	1 hour	4 hours				Sequence	Start	End	length
AAVILES	2	8		-0.0737	-0.1148	-0.0529	-0.0238	0.0238	0.001			LKRSQQKKKTSPLNF	11	25		0.1801	0.2605	-0.1977	0.0415	0.0978		LKRSQQKKKTSPLNF	11	25		0.1801	0.2605	-0.1977	0.0415	0.0978				AAVILES	2	8	7
IFLKRSQQKKKTSPLN	9	24		-0.018	0.0793	-0.4004	-0.1418	-0.3215	-0.178			LTVHKLSY	32	39		-0.0244	-0.0085	0.0008	-0.0019	0.0197		LTVHKLSY	32	39		-0.0244	-0.0085	0.0008	-0.0019	0.0197				IFLKRSQQKKKTSPLN	9	24	16
IFLKRSQQKKKTSPLNF	9	25		0.028	-0.0257	-0.0272	-0.1269	-0.0465	-0.0069			TVHKLSY	33	39		-0.0055	-0.0331	-0.0087	0.0247	-0.0333		TVHKLSY	33	39		-0.0055	-0.0331	-0.0087	0.0247	-0.0333				IFLKRSQQKKKTSPLNF	9	25	17
LKRSQQKKKTSPLNF	11	25		0.1801	0.2605	-0.1397	-0.1977	0.0415	0.0978			FERGRRGSKKGSIDVE	44	59		-0.0693	-0.06	-0.0297	0.0078	0.0049		FERGRRGSKKGSIDVE	44	59		-0.0693	-0.06	-0.0297	0.0078	0.0049				IFLKRSQQKKKTSPLNFKKRLFL	9	31	23
IFLKRSQQKKKTSPLNFKKRLFL	9	31		0.0767	0.1594	0.075	0.1902	-0.0837	-0.0366			VEKITCVE	58	65		-0.029	-0.0133	-0.055	0.0104	-0.0133		VEKITCVE	58	65		-0.029	-0.0133	-0.055	0.0104	-0.0133				LKRSQQKKKTSPLNF	11	25	15
LKRSQQKKKTSPLNFKKRLFL	11	31		0.1312	0.204	0.0695	0.0335	0.0009	0.0884			VETVIPEKNPPPERQIPRRGEE	64	85		0.1809	0.0097	-0.1658	0.0556	0.1068		VETVIPEKNPPPERQIPRRGEE	64	85		0.1809	0.0097	-0.1658	0.0556	0.1068				LKRSQQKKKTSPLNFKKRLFL	11	31	21
FKKRLFL	25	31		0.1077	-0.0188	0.2408	0.027	-0.0626	-0.0003			VETVIPEKNPPPERQIPRRGEESSE	64	88		0.0079	0.2051	-0.1377	0.2535	-0.0509		VETVIPEKNPPPERQIPRRGEESSE	64	88		0.0079	0.2051	-0.1377	0.2535	-0.0509				FKKRLFL	25	31	7
LTVHKLSY	32	39		-0.0244	-0.0085	-0.0118	0.0008	-0.0019	0.0197			VETVIPEKNPPPERQIPRRGEESSEM	64	89		0.1325	0.1851	-0.1487	0.0397	0.0549		VETVIPEKNPPPERQIPRRGEESSEM	64	89		0.1325	0.1851	-0.1487	0.0397	0.0549				LTVHKLSY	32	39	8
TVHKLSY	33	39		-0.0055	-0.0331	0.0082	-0.0087	0.0247	-0.0333			TVIPEKNPPPERQIPRRGEE	66	85		0.2081	0.2279	-0.058	0.0116	0.0112		TVIPEKNPPPERQIPRRGEE	66	85		0.2081	0.2279	-0.058	0.0116	0.0112				LTVHKLSYYE	32	41	10
LTVHKLSYYE	32	41		-0.1054	-0.0726	-0.0665	-0.0783	-0.09	-0.0712			TVIPEKNPPPERQIPRRGEESSE	66	88		0.0018	0.1653	-0.1192	0.0852	-0.0639		TVIPEKNPPPERQIPRRGEESSE	66	88		0.0018	0.1653	-0.1192	0.0852	-0.0639				LTVHKLSYYEYD	32	43	12
LTVHKLSYYEYD	32	43		-0.0986	-0.0557	-0.0735	-0.0824	-0.1293	-0.022			TVIPEKNPPPERQIPRRGEESSEM	66	89		-0.075	-0.0413	-0.0677	-0.0569	-0.0288		TVIPEKNPPPERQIPRRGEESSEM	66	89		-0.075	-0.0413	-0.0677	-0.0569	-0.0288				TVHKLSY	33	39	7
FERGRRGSKKGSID	44	57		0.1366	-0.0706	0.0109	-0.0576	0.0582	0.158			ISIIERFPYPFQ	92	103		-0.0372	-0.0486	-0.047	-0.0221	0.0419		ISIIERFPYPFQ	92	103		-0.0372	-0.0486	-0.047	-0.0221	0.0419				YEYDFERGRRGSKKGSIDVEKITC	40	63	24
DFERGRRGSKKGSIDVE	43	59		-0.1401	-0.0786	-0.2817	-0.3989	-0.0206	-0.2296			VVYDEGPL	104	111		-0.0392	-0.0317	-0.0603	-0.0104	-0.0095		VVYDEGPL	104	111		-0.0392	-0.0317	-0.0603	-0.0104	-0.0095				DFERGRRGSKKGSIDVE	43	59	17
YEYDFERGRRGSKKGSIDVEKITC	40	63		-0.1946	0.1637	0.4188	0.2128	-0.1287	-0.0506			VVYDEGPLYVFSPTEE	104	119		-0.0215	0.0188	-0.0704	0.0012	0.0532		VVYDEGPLYVFSPTEE	104	119		-0.0215	0.0188	-0.0704	0.0012	0.0532				FERGRRGSKKGSID	44	57	14
FERGRRGSKKGSIDVE	44	59		-0.0693	-0.06	-0.012	-0.0297	0.0078	0.0049			VIRYNSDL	131	138		-0.1036	0.0484	0.1939	0.0145	0.0643		VIRYNSDL	131	138		-0.1036	0.0484	0.1939	0.0145	0.0643				FERGRRGSKKGSIDVE	44	59	16
FERGRRGSKKGSIDVEKITC	44	63		-0.0079	0.1215	0.0675	-0.0559	-0.0794	-0.0362			VQKYHPCF	139	146		-0.0021	0.0305	0.0143	0.0344	0.0161		VQKYHPCF	139	146		-0.0021	0.0305	0.0143	0.0344	0.0161				FERGRRGSKKGSIDVEKITC	44	63	20
FERGRRGSKKGSIDVEKITCVE	44	65		-0.0807	0.0699	-0.0506		-0.2212	-0.0228			QKYHPCF	140	146		-0.0125	-0.0184	-0.0063	-0.0001	-0.0237		QKYHPCF	140	146		-0.0125	-0.0184	-0.0063	-0.0001	-0.0237				FERGRRGSKKGSIDVEKITCVE	44	65	22
VEKITCVE	58	65		-0.029	-0.0133	-0.0166	-0.055	0.0104	-0.0133			LCCSQTAKNAMGCQ	153	166		-0.0011	0.0726	0.0692	0.1458	0.1163		LCCSQTAKNAMGCQ	153	166		-0.0011	0.0726	0.0692	0.1458	0.1163				VEKITCVE	58	65	8
VETVIPEKNPPPERQIPRRGEE	64	85		0.1809	0.0097	-0.1209	-0.1658	0.0556	0.1068			CCSQTAKNAMGCQ	154	166		-0.0913	-0.0368	-0.0653	0.0466	0.0294		CCSQTAKNAMGCQ	154	166		-0.0913	-0.0368	-0.0653	0.0466	0.0294				VETVIPEKNPPPERQIPRRGEE	64	85	22
VETVIPEKNPPPERQIPRRGEES	64	86		0.0631	0.0523	-0.1729	-0.0396	0.1698	0.036			ILENRNGSLKPGSS	167	180		0.0491	-0.0207	-0.1291	-0.0322	0.1663		ILENRNGSLKPGSS	167	180		0.0491	-0.0207	-0.1291	-0.0322	0.1663				VETVIPEKNPPPERQIPRRGEES	64	86	23
TVIPEKNPPPERQIPRRGEE	66	85		0.2081	0.2279	-0.0406	-0.058	0.0116	0.0112			ILENRNGSLKPGSSHRKTKKPLPPTPEE	167	194		0.1263	0.0999	-0.0344	0.0038	0.0947		ILENRNGSLKPGSSHRKTKKPLPPTPEE	167	194		0.1263	0.0999	-0.0344	0.0038	0.0947				VETVIPEKNPPPERQIPRRGEESSE	64	88	25
VETVIPEKNPPPERQIPRRGEESSE	64	88		0.0079	0.2051	0.0059	-0.1377	0.2535	-0.0509			DQILKKPLPPEPTAAPISTTE	195	215		-0.073	-0.0103	-0.0699	-0.0009	0.0382		DQILKKPLPPEPTAAPISTTE	195	215		-0.073	-0.0103	-0.0699	-0.0009	0.0382				VETVIPEKNPPPERQIPRRGEESSEM	64	89	26
TVIPEKNPPPERQIPRRGEES	66	86		-0.0266	0.0783	-0.178	-0.0411	0.0299	0.062			ILKKPLPPEPTAAPIST	197	213		-0.0113	0.0555	-0.047	-0.0211	-0.097		ILKKPLPPEPTAAPIST	197	213		-0.0113	0.0555	-0.047	-0.0211	-0.097				TVIPEKNPPPERQIPRRGEE	66	85	20
VETVIPEKNPPPERQIPRRGEESSEM	64	89		0.1325	0.1851	-0.039	-0.1487	0.0397	0.0549			ILKKPLPPEPTAAPISTTE	197	215		0.0007	-0.1368	-0.1448	-0.1299	0.0025		ILKKPLPPEPTAAPISTTE	197	215		0.0007	-0.1368	-0.1448	-0.1299	0.0025				TVIPEKNPPPERQIPRRGEES	66	86	21
TVIPEKNPPPERQIPRRGEESSE	66	88		0.0018	0.1653	-0.0519	-0.1192	0.0852	-0.0639			YDYMPMNA	223	230		0.3582	0.0132	0.0813	0.295	0.0778		YDYMPMNA	223	230		0.3582	0.0132	0.0813	0.295	0.0778				TVIPEKNPPPERQIPRRGEESSE	66	88	23
TVIPEKNPPPERQIPRRGEESSEM	66	89		-0.075	-0.0413	0.0084	-0.0677	-0.0569	-0.0288			YDYMPMNAND	223	232		0.3782	0.1023	0.2941	0.3051	0.1127		YDYMPMNAND	223	232		0.3782	0.1023	0.2941	0.3051	0.1127				TVIPEKNPPPERQIPRRGEESSEM	66	89	24
ISIIERFPYPFQ	92	103		-0.0372	-0.0486	-0.0134	-0.047	-0.0221	0.0419			LQLRKGEE	233	240		0.0226	0.1486	0.859	0.8367	0.0862		LQLRKGEE	233	240		0.0226	0.1486	0.859	0.8367	0.0862				ISIIERFPYPFQ	92	103	12
IIERFPYPFQVVY	94	106		-0.0248	-0.0219	-0.0903	-0.1009	-0.0579	-0.0696			LQLRKGEEY	233	241		0.0218	0.1392	1.0103	1.2051	0.1631		LQLRKGEEY	233	241		0.0218	0.1392	1.0103	1.2051	0.1631				IIERFPYPFQVVY	94	106	13
IERFPYPFQVVY	95	106		0.0855	-0.1154	-0.0483	0.0172	0.0218	-0.0045			ILEESNLPWWRARDKNGQE	243	261		0.0082	0.1791	0.9897	0.9083	0.2443		ILEESNLPWWRARDKNGQE	243	261		0.0082	0.1791	0.9897	0.9083	0.2443				IERFPYPFQVVY	95	106	12
VVYDEGPL	104	111		-0.0392	-0.0317	-0.0228	-0.0603	-0.0104	-0.0095			ILEESNLPWWRARDKNGQEGYIPSN	243	267		0.2108	0.368	1.5328	1.3472	0.396		ILEESNLPWWRARDKNGQEGYIPSN	243	267		0.2108	0.368	1.5328	1.3472	0.396				VVYDEGPL	104	111	8
VVYDEGPLY	104	112		-0.026	-0.039	0.0024	-0.0522	0.0054	-0.0145			ILEESNLPWWRARDKNGQEGYIPSNY	243	268		0.1499	0.3499	1.877	1.488	0.4948		ILEESNLPWWRARDKNGQEGYIPSNY	243	268		0.1499	0.3499	1.877	1.488	0.4948				VVYDEGPLY	104	112	9
VVYDEGPLYVF	104	114		-0.0037	-0.0028	0.0112	-0.0048	0.1039	0.085			EESNLPWWRARDKNGQEGYIPSN	245	267		0.306	0.5088	1.4816	1.4793	0.4753		EESNLPWWRARDKNGQEGYIPSN	245	267		0.306	0.5088	1.4816	1.4793	0.4753				VVYDEGPLYVF	104	114	11
DEGPLYV	107	113		-0.005	-0.0576	-0.0625	-0.0111	0.0038	-0.0157			EESNLPWWRARDKNGQEGYIPSNY	245	268		0.2397	0.5238	1.9318	1.599	0.4513		EESNLPWWRARDKNGQEGYIPSNY	245	268		0.2397	0.5238	1.9318	1.599	0.4513				VVYDEGPLYVFSPTEE	104	119	16
VVYDEGPLYVFSPTEE	104	119		-0.0215	0.0188	-0.1371	-0.0704	0.0012	0.0532			AEDSIEM	272	278		0.1845	0.1216	-0.0363	0.0269	-0.006		AEDSIEM	272	278		0.1845	0.1216	-0.0363	0.0269	-0.006				VVYDEGPLYVFSPTEEL	104	120	17
VVYDEGPLYVFSPTEEL	104	120		0.0121	0.1036	-0.0769	-0.0558	0.0962	0.0395			YEWYSKHMTRSQAEQL	279	294		0.3341	0.6246	0.8803	0.6404	0.0236		YEWYSKHMTRSQAEQL	279	294		0.3341	0.6246	0.8803	0.6404	0.0236				VVYDEGPLYVFSPTEELRKRWIHQLKN	104	130	27
DEGPLYVFSPTEE	107	119		-0.0106	0.0204	-0.1022	-0.1548	0.0174	-0.0604			WYSKHMTRSQAEQL	281	294		0.3747	0.3544	0.8444	0.7034	0.1164		WYSKHMTRSQAEQL	281	294		0.3747	0.3544	0.8444	0.7034	0.1164				DEGPLYV	107	113	7
YVFSPTEE	112	119		0.0009	-0.0043	-0.0307	-0.0518	-0.0097	-0.0144			YSKHMTRSQAEQL	282	294		0.3469	0.2721	0.7281	0.7567	0.1179		YSKHMTRSQAEQL	282	294		0.3469	0.2721	0.7281	0.7567	0.1179				DEGPLYVFSPTEE	107	119	13
VVYDEGPLYVFSPTEELRKRWIHQLKN	104	130		-0.112	0.0589	0.0618	-0.1178	-0.1369	0.0458			FAKSTGEPQGVIRH	320	333		0.0142	0.125	0.1221	0.087	0.0209		FAKSTGEPQGVIRH	320	333		0.0142	0.125	0.1221	0.087	0.0209				YVFSPTEE	112	119	8
LRKRWIHQLKN	120	130		-0.0482	-0.0015	-0.0136	-0.0187	-0.0102	0.0156			FAKSTGEPQGVIRHYVV	320	336		0.0792	0.1757	0.5908	0.2619	0.1279		FAKSTGEPQGVIRHYVV	320	336		0.0792	0.1757	0.5908	0.2619	0.1279				LRKRWIHQLKN	120	130	11
LRKRWIHQLKNVIRY	120	134		-0.2252	0.0248	0.0877	0.0247	-0.049	0.0557			FAKSTGEPQGVIRHYVVC	320	337		0.2396	0.2318	0.7717	0.4676	0.0585		FAKSTGEPQGVIRHYVVC	320	337		0.2396	0.2318	0.7717	0.4676	0.0585				LRKRWIHQLKNVIRY	120	134	15
VIRYNSDL	131	138		-0.1036	0.0484	0.0007	0.1939	0.0145	0.0643			AKSTGEPQGVIRHYVV	321	336		0.1364	0.1777	0.5646	0.6088	0.0871		AKSTGEPQGVIRHYVV	321	336		0.1364	0.1777	0.5646	0.6088	0.0871				VIRYNSDL	131	138	8
LVQKYHPCF	138	146		0.0791	0.0424	-0.0039	0.0719	0.0793	0.1415			AKSTGEPQGVIRHYVVC	321	337		0.1259	0.3313	0.8453	0.4802	-0.0579		AKSTGEPQGVIRHYVVC	321	337		0.1259	0.3313	0.8453	0.4802	-0.0579				LVQKYHPCF	138	146	9
VQKYHPCF	139	146		-0.0021	0.0305	0.0405	0.0143	0.0344	0.0161			YVVCSTPQSQY	334	344		0.0763	0.2987	0.6468	0.3719	-0.0716		YVVCSTPQSQY	334	344		0.0763	0.2987	0.6468	0.3719	-0.0716				VQKYHPCF	139	146	8
QKYHPCF	140	146		-0.0125	-0.0184	0.0053	-0.0063	-0.0001	-0.0237			YLAEKHLFSTIPEL	345	358		0.0613	0.1349	0.4428	0.2591	0.0211		YLAEKHLFSTIPEL	345	358		0.0613	0.1349	0.4428	0.2591	0.0211				QKYHPCF	140	146	7
WIDGQYL	147	153		-0.0469	-0.0392	-0.0259	-0.0069	0.032	0.0002			FSTIPEL	352	358		-0.0119	0.0445	0.2016	0.185	0.0081		FSTIPEL	352	358		-0.0119	0.0445	0.2016	0.185	0.0081				WIDGQYL	147	153	7
WIDGQYLC	147	154		-0.007	0.012	0.0123	-0.0551	0.0107	-0.0073			ISRLKYPVSKQNKNAPSTAGL	370	390		0.3275	0.7315	0.536	0.0098	0.034		ISRLKYPVSKQNKNAPSTAGL	370	390		0.3275	0.7315	0.536	0.0098	0.034				WIDGQYLC	147	154	8
LCCSQTAKNAMG	153	164		-0.1108	-0.0931	0.0284	-0.1373	-0.0591	0.0266			ISRLKYPVSKQNKNAPSTAGLG	370	391		0.247	0.7759	0.4708	0.0092	0.0895		ISRLKYPVSKQNKNAPSTAGLG	370	391		0.247	0.7759	0.4708	0.0092	0.0895				LCCSQTAKNAMG	153	164	12
LCCSQTAKNAMGCQ	153	166		-0.0011	0.0726	0.0765	0.0692	0.1458	0.1163			ISRLKYPVSKQNKNAPSTAGLGYGSW	370	395		0.3231	0.7637	0.5147	0.0374	-0.0345		ISRLKYPVSKQNKNAPSTAGLGYGSW	370	395		0.3231	0.7637	0.5147	0.0374	-0.0345				LCCSQTAKNAMGCQ	153	166	14
CCSQTAKNAMGCQ	154	166		-0.0913	-0.0368	-0.1336	-0.0653	0.0466	0.0294			KQNKNAPSTAGLGYGSW	379	395		0.006	-0.0962	-0.2009	0.0008	-0.1035		KQNKNAPSTAGLGYGSW	379	395		0.006	-0.0962	-0.2009	0.0008	-0.1035				CCSQTAKNAMGCQ	154	166	13
SQTAKNAMGC	156	165		0.0317	0.0146	-0.0747	0.0168	0.0128	0.0037			EIDPKDLTF	396	404		-0.0823	-0.0713	-0.2916	-0.1054	0.001		EIDPKDLTF	396	404		-0.0823	-0.0713	-0.2916	-0.1054	0.001				SQTAKNAMGC	156	165	10
SQTAKNAMGCQ	156	166		-0.0189	0.1259	0.0496	-0.0038	-0.0035	0.0823			EIDPKDLTFL	396	405		-0.0357	-0.0054	-0.3056	-0.083	-0.0136		EIDPKDLTFL	396	405		-0.0357	-0.0054	-0.3056	-0.083	-0.0136				SQTAKNAMGCQ	156	166	11
TAKNAMGCQ	158	166		-0.0307	0.079	-0.1371	-0.1255	-0.0084	-0.0317			FLKELGTGQF	404	413		-0.8505	-0.8103	-0.366	-0.069	-0.1045		FLKELGTGQF	404	413		-0.8505	-0.8103	-0.366	-0.069	-0.1045				TAKNAMGCQ	158	166	9
ILENRNGSLKPGSS	167	180		0.0491	-0.0207	-0.0603	-0.1291	-0.0322	0.1663			KELGTGQF	406	413		-0.5778	-0.6318	-0.3639	-0.0929	-0.0655		KELGTGQF	406	413		-0.5778	-0.6318	-0.3639	-0.0929	-0.0655				ILENRNGSLKPGSS	167	180	14
LENRNGSLKPGSS	168	180		0.0343	-0.0925	-0.1368	-0.014	-0.0208	-0.0368			GVVKYGKWRGQY	414	425		0.0245	-0.396	-1.6743	-2.4745	-2.4555		GVVKYGKWRGQY	414	425		0.0245	-0.396	-1.6743	-2.4745	-2.4555				ILENRNGSLKPGSSHRKTKKPLPPTPEE	167	194	28
ILENRNGSLKPGSSHRKTKKPLPPTPEE	167	194		0.1263	0.0999	0.0214	-0.0344	0.0038	0.0947			GVVKYGKWRGQYDVA	414	428		0.0573	-0.3151	-1.5025	-2.2769	-2.2955		GVVKYGKWRGQYDVA	414	428		0.0573	-0.3151	-1.5025	-2.2769	-2.2955				LENRNGSLKPGSS	168	180	13
ENRNGSLKPGSSHRKTKKPLPPTPEE	169	194		0.2778	0.0424	-0.037	-0.5357	-0.0287	0.0635			VKYGKWRGQY	416	425		-0.008	-0.3158	-1.2399	-1.9168	-1.8703		VKYGKWRGQY	416	425		-0.008	-0.3158	-1.2399	-1.9168	-1.8703				ENRNGSLKPGSSHRKTKKPLPPTPEE	169	194	26
DQILKKPLPPEPTAAPIST	195	213		0.1113	-0.2357	-0.0864	-0.1247	0.0438	0.0813			KYGKWRGQY	417	425		-0.006	-0.3057	-1.4946	-1.8534	-2.3444		KYGKWRGQY	417	425		-0.006	-0.3057	-1.4946	-1.8534	-2.3444				DQILKKPLPPEPTAAPIST	195	213	19
QILKKPLPPEPTAAPIST	196	213		-0.1221	-0.1437	-0.0588	-0.0371	0.011	0.048			IREGSMSE	432	439		0.02	-0.0521	-0.0476	-0.0295	0.0135		IREGSMSE	432	439		0.02	-0.0521	-0.0476	-0.0295	0.0135				DQILKKPLPPEPTAAPISTTE	195	215	21
DQILKKPLPPEPTAAPISTTE	195	215		-0.073	-0.0103	-0.0755	-0.0699	-0.0009	0.0382			IREGSMSEDE	432	441		0.0392	0.0044	-0.0671	0.0875	0.0054		IREGSMSEDE	432	441		0.0392	0.0044	-0.0671	0.0875	0.0054				DQILKKPLPPEPTAAPISTTEL	195	216	22
ILKKPLPPEPTAAPIST	197	213		-0.0113	0.0555	-0.1643	-0.047	-0.0211	-0.097			AKVMMNLSHEKL	446	457		0.1493	0.2362	0.1898	0.18	0.1077		AKVMMNLSHEKL	446	457		0.1493	0.2362	0.1898	0.18	0.1077				QILKKPLPPEPTAAPIST	196	213	18
DQILKKPLPPEPTAAPISTTEL	195	216		0.0194	-0.1306	0.0262	-0.0341	0.1217	0.1412			NLSHEKL	451	457		0.1397	0.1028	0.1977	0.3194	0.0511		NLSHEKL	451	457		0.1397	0.1028	0.1977	0.3194	0.0511				QILKKPLPPEPTAAPISTTE	196	215	20
QILKKPLPPEPTAAPISTTE	196	215		-0.0255	0.0001	0.0022	-0.0752	-0.0337	0.0668			GVCTKQRPIF	462	471		0.0181	0.0293	0.0746	0.1295	-0.0307		GVCTKQRPIF	462	471		0.0181	0.0293	0.0746	0.1295	-0.0307				ILKKPLPPEPTAAPIST	197	213	17
LKKPLPPEPTAAPIST	198	213		-0.0336	-0.0543	-0.0501	-0.1532	-0.0614	-0.0138			TKQRPIF	465	471		0.0262	0.0178	-0.011	-0.0227	-0.0286		TKQRPIF	465	471		0.0262	0.0178	-0.011	-0.0227	-0.0286				ILKKPLPPEPTAAPISTTE	197	215	19
ILKKPLPPEPTAAPISTTE	197	215		0.0007	-0.1368	-0.1373	-0.1448	-0.1299	0.0025			EYLESKQFL	510	518		-0.0438	0.0578	-0.1579	-0.1623	-0.2279		EYLESKQFL	510	518		-0.0438	0.0578	-0.1579	-0.1623	-0.2279				LKKPLPPEPTAAPIST	198	213	16
LKKVVAL	216	222		0.0072	0.036	0.356	0.6702	0.948	0.118			YLESKQFL	511	518		0.0577	0.1598	-0.1255	-0.1109	-0.2206		YLESKQFL	511	518		0.0577	0.1598	-0.1255	-0.1109	-0.2206				LKKVVAL	216	222	7
YDYMPMNA	223	230		0.3582	0.0132	0.0543	0.0813	0.295	0.0778			YLESKQFLHRDLAARNCL	511	528		0.0283	0.183	-0.0055	-0.2895	-0.3583		YLESKQFLHRDLAARNCL	511	528		0.0283	0.183	-0.0055	-0.2895	-0.3583				LYDYMPMNAND	222	232	11
LYDYMPMNAND	222	232		0.4551	0.0579	0.3779	0.2927	0.2534	0.1474			FLHRDLAARNCL	517	528		0.1599	0.1489	0.1919	-0.0712	-0.1246		FLHRDLAARNCL	517	528		0.1599	0.1489	0.1919	-0.0712	-0.1246				YDYMPMNA	223	230	8
YDYMPMNAND	223	232		0.3782	0.1023	0.2694	0.2941	0.3051	0.1127			CLVNDQGVVKVSD	527	539		-0.7258	-0.7042	-0.5495	-0.3883	-0.616		CLVNDQGVVKVSD	527	539		-0.7258	-0.7042	-0.5495	-0.3883	-0.616				YDYMPMNAND	223	232	10
NDLQLRKGEEY	231	241		0.037	0.2547	1.0737	1.5086	1.3696	0.1399			CLVNDQGVVKVSDF	527	540		-0.7022	-0.8215	-1.0819	-1.1158	-1.2778		CLVNDQGVVKVSDF	527	540		-0.7022	-0.8215	-1.0819	-1.1158	-1.2778				NDLQLRKGEEY	231	241	11
LQLRKGEE	233	240		0.0226	0.1486	0.6629	0.859	0.8367	0.0862			VNDQGVVKVSD	529	539		-0.7022	-0.7198	-0.5184	-0.3003	-0.6049		VNDQGVVKVSD	529	539		-0.7022	-0.7198	-0.5184	-0.3003	-0.6049				LQLRKGEE	233	240	8
LQLRKGEEY	233	241		0.0218	0.1392	0.5854	1.0103	1.2051	0.1631			VNDQGVVKVSDFGL	529	542		-0.6337	-1.2212	-1.5934	-1.0369	-1.0207		VNDQGVVKVSDFGL	529	542		-0.6337	-1.2212	-1.5934	-1.0369	-1.0207				LQLRKGEEY	233	241	9
QLRKGEE	234	240		-0.0133	0.2245	0.6487	0.7766	0.8735	0.0867			VNDQGVVKVSDFGLS	529	543		-0.8051	-1.3465	-1.6926	-1.0578	-1.1012		VNDQGVVKVSDFGLS	529	543		-0.8051	-1.3465	-1.6926	-1.0578	-1.1012				LQLRKGEEYF	233	242	10
LQLRKGEEYF	233	242		0.0707	0.2911	0.6631	0.9027	1.2845	0.3286			VNDQGVVKVSDFGLSRY	529	545		-0.8511	-1.3195	-1.7647	-1.0816	-1.1102		VNDQGVVKVSDFGLSRY	529	545		-0.8511	-1.3195	-1.7647	-1.0816	-1.1102				QLRKGEE	234	240	7
QLRKGEEY	234	241		0.0159	0.0778	0.5826	0.8053	1.0084	0.1987			VNDQGVVKVSDFGLSRYVL	529	547		-0.8112	-1.256	-1.589	-0.9541	-1.1967		VNDQGVVKVSDFGLSRYVL	529	547		-0.8112	-1.256	-1.589	-0.9541	-1.1967				QLRKGEEY	234	241	8
RKGEEYF	236	242		0.1244	0.2815	0.4817	0.5104	0.7913	0.295			VVKVSDF	534	540		-0.459	-0.7012	-1.0347	-1.04	-1.1494		VVKVSDF	534	540		-0.459	-0.7012	-1.0347	-1.04	-1.1494				RKGEEYF	236	242	7
ILEESNLPWWRARDKNGQE	243	261		0.0082	0.1791	0.6564	0.9897	0.9083	0.2443			VVKVSDFGL	534	542		-0.5826	-1.1996	-1.8297	-1.1489	-1.1847		VVKVSDFGL	534	542		-0.5826	-1.1996	-1.8297	-1.1489	-1.1847				ILEESNLPWWRARDKNGQE	243	261	19
ILEESNLPWWRARDKNGQEGYIPSN	243	267		0.2108	0.368	1.225	1.5328	1.3472	0.396			FGLSRYVL	540	547		-0.1784	-0.3349	-0.4053	-0.0552	0.0194		FGLSRYVL	540	547		-0.1784	-0.3349	-0.4053	-0.0552	0.0194				ILEESNLPWWRARDKNGQEGYIPSN	243	267	25
ILEESNLPWWRARDKNGQEGYIPSNY	243	268		0.1499	0.3499	1.4158	1.877	1.488	0.4948			FGLSRYVLDD	540	549		-0.1318	-0.3006	-0.2912	0.0234	0.0412		FGLSRYVLDD	540	549		-0.1318	-0.3006	-0.2912	0.0234	0.0412				ILEESNLPWWRARDKNGQEGYIPSNY	243	268	26
EESNLPWWRARDKNGQEGYIPSN	245	267		0.306	0.5088	1.1892	1.4816	1.4793	0.4753			GLSRYVL	541	547		-0.1333	-0.1591	-0.0704	0.013	-0.0099		GLSRYVL	541	547		-0.1333	-0.1591	-0.0704	0.013	-0.0099				EESNLPWWRARDKNGQEGYIPSN	245	267	23
EESNLPWWRARDKNGQEGYIPSNY	245	268		0.2397	0.5238	1.4335	1.9318	1.599	0.4513			GLSRYVLDD	541	549		0.0174	-0.2086	0.1281	0.1981	0.1073		GLSRYVLDD	541	549		0.0174	-0.2086	0.1281	0.1981	0.1073				EESNLPWWRARDKNGQEGYIPSNY	245	268	24
ESNLPWWRARDKNGQEGYIPSNY	246	268		0.1764	0.5395	1.3524	1.785	1.5894	0.5939			GLSRYVLDDE	541	550		-0.1862	-0.0727	-0.0608	-0.0807	-0.0365		GLSRYVLDDE	541	550		-0.1862	-0.0727	-0.0608	-0.0807	-0.0365				ESNLPWWRARDKNGQEGYIPSNY	246	268	23
SNLPWWRARDKNGQEGYIPSN	247	267		0.2634	0.5897	1.1757	1.8621	1.1926	0.524			SRYVLDD	543	549		-0.02	-0.144	0.0032	-0.1026	-0.0817		SRYVLDD	543	549		-0.02	-0.144	0.0032	-0.1026	-0.0817				SNLPWWRARDKNGQEGYIPSN	247	267	21
SNLPWWRARDKNGQEGYIPSNY	247	268		0.2013	0.5122	1.5603	1.9998	1.3097	0.5166			EYTSSVGSKF	550	559		0.0685	0.1117	0.0216	0.131	0.0761		EYTSSVGSKF	550	559		0.0685	0.1117	0.0216	0.131	0.0761				SNLPWWRARDKNGQEGYIPSNY	247	268	22
GYIPSNY	262	268		0.1574	0.0893	0.4342	0.6093	0.4297	0.3506			EYTSSVGSKFPVRWSPPEVL	550	569		-0.0277	0.0466	0.2465	0.0529	-0.0058		EYTSSVGSKFPVRWSPPEVL	550	569		-0.0277	0.0466	0.2465	0.0529	-0.0058				GYIPSNY	262	268	7
AEDSIEM	272	278		0.1845	0.1216	-0.0079	-0.0363	0.0269	-0.006			YTSSVGSKF	551	559		0.0113	0.04	-0.0172	0.0514	-0.0469		YTSSVGSKF	551	559		0.0113	0.04	-0.0172	0.0514	-0.0469				AEDSIEM	272	278	7
YEWYSKHMTRSQAEQL	279	294		0.3341	0.6246	0.8749	0.8803	0.6404	0.0236			TSSVGSKFPVRWSPPEVL	552	569		-0.0665	-0.0999	0.1746	-0.0614	-0.199		TSSVGSKFPVRWSPPEVL	552	569		-0.0665	-0.0999	0.1746	-0.0614	-0.199				YEWYSKHMTRSQAEQL	279	294	16
YEWYSKHMTRSQAEQLL	279	295		0.6132	0.3391	1.1336	1.2012	1.2071	0.1462			MYSKFSSKSDIWA	570	582		-0.2154	-0.1792	-0.149	-0.1557	-0.1568		MYSKFSSKSDIWA	570	582		-0.2154	-0.1792	-0.149	-0.1557	-0.1568				YEWYSKHMTRSQAEQLL	279	295	17
WYSKHMTRSQAEQL	281	294		0.3747	0.3544	0.6673	0.8444	0.7034	0.1164			SSKSDIWA	575	582		0.0056	-0.0004	-0.0764	-0.0409	-0.0648		SSKSDIWA	575	582		0.0056	-0.0004	-0.0764	-0.0409	-0.0648				WYSKHMTRSQAEQL	281	294	14
YSKHMTRSQAEQ	282	293		0.2006	0.297	0.2589	0.4479	0.6816	-0.0122			SSKSDIWAF	575	583		-0.0504	-0.0177	-0.1036	-0.087	-0.1201		SSKSDIWAF	575	583		-0.0504	-0.0177	-0.1036	-0.087	-0.1201				YSKHMTRSQAEQ	282	293	12
YSKHMTRSQAEQL	282	294		0.3469	0.2721	0.5948	0.7281	0.7567	0.1179			MWEIYSL	587	593		-0.0043	-0.0252	0.008	0.0263	0.038		MWEIYSL	587	593		-0.0043	-0.0252	0.008	0.0263	0.038				YSKHMTRSQAEQL	282	294	13
LLKQEGKEGGF	294	304		0.1282	0.2097	0.628	0.7344	0.1989	0.0882			MWEIYSLGKMPYERF	587	601		0.0288	0.1971	0.1745	0.2385	0.0701		MWEIYSLGKMPYERF	587	601		0.0288	0.1971	0.1745	0.2385	0.0701				LLKQEGKEGGF	294	304	11
IVRDSSKAGKY	305	315		0.0865	0.0456	0.1136	0.1146	0.0007	-0.0256			WEIYSLGKMPYERF	588	601		0.0924	0.2255	0.2227	0.2159	0.1015		WEIYSLGKMPYERF	588	601		0.0924	0.2255	0.2227	0.2159	0.1015				IVRDSSKAGKY	305	315	11
VRDSSKAGKY	306	315		0.1373	0.0608	0.125	0.1072	-0.013	-0.0797			WEIYSLGKMPYERFTNSE	588	605		0.2194	0.326	0.2658	0.3268	0.25		WEIYSLGKMPYERFTNSE	588	605		0.2194	0.326	0.2658	0.3268	0.25				IVRDSSKAGKYTVSV	305	319	15
FAKSTGEPQGVIRH	320	333		0.0142	0.125	0.2037	0.1221	0.087	0.0209			IYSLGKMPYERF	590	601		-0.0616	0.2073	0.2782	0.1916	0.12		IYSLGKMPYERF	590	601		-0.0616	0.2073	0.2782	0.1916	0.12				VRDSSKAGKY	306	315	10
FAKSTGEPQGVIRHYVV	320	336		0.0792	0.1757	0.4357	0.5908	0.2619	0.1279			GKMPYERF	594	601		0.0756	0.1634	0.1325	0.0349	0.0155		GKMPYERF	594	601		0.0756	0.1634	0.1325	0.0349	0.0155				FAKSTGEPQGVIRH	320	333	14
FAKSTGEPQGVIRHYVVC	320	337		0.2396	0.2318	0.6147	0.7717	0.4676	0.0585			GKMPYERFTNSE	594	605		0.2776	0.3049	-0.0566	0.0012	0.0934		GKMPYERFTNSE	594	605		0.2776	0.3049	-0.0566	0.0012	0.0934				FAKSTGEPQGVIRHYVV	320	336	17
AKSTGEPQGVIRHYVV	321	336		0.1364	0.1777	0.3853	0.5646	0.6088	0.0871			GKMPYERFTNSETAE	594	608		0.2853	0.6904	0.0631	0.1071	0.0921		GKMPYERFTNSETAE	594	608		0.2853	0.6904	0.0631	0.1071	0.0921				FAKSTGEPQGVIRHYVVC	320	337	18
AKSTGEPQGVIRHYVVC	321	337		0.1259	0.3313	0.6033	0.8453	0.4802	-0.0579			TAEHIAQGLRLPRPHL	606	621		0.0922	0.5032	0.3783	0.0693	0.0701		TAEHIAQGLRLPRPHL	606	621		0.0922	0.5032	0.3783	0.0693	0.0701				FAKSTGEPQGVIRHYVVCSTPQSQ	320	343	24
PQGVIRH	327	333		0.005	0.0777	0.1436	0.2361	-0.0119	-0.0223			HIAQGLRLPRPHL	609	621		0.0432	0.2866	0.1107	0.1543	0.1839		HIAQGLRLPRPHL	609	621		0.0432	0.2866	0.1107	0.1543	0.1839				AKSTGEPQGVIRHYVV	321	336	16
FAKSTGEPQGVIRHYVVCSTPQSQ	320	343		0.1009	0.5529	0.7131	0.7832	0.4477	0.0441			HIAQGLRLPRPHLAS	609	623		0.018	0.256	0.1273	0.0253	0.1877		HIAQGLRLPRPHLAS	609	623		0.018	0.256	0.1273	0.0253	0.1877				AKSTGEPQGVIRHYVVC	321	337	17
PQGVIRHYVVC	327	337		0.1281	0.1605	0.656	0.8581	0.3826	-0.0158			LRLPRPHLAS	614	623		0.0176	0.0371	0.0042	0.1033	0.1092		LRLPRPHLAS	614	623		0.0176	0.0371	0.0042	0.1033	0.1092				PQGVIRH	327	333	7
YVVCSTPQSQ	334	343		0.0829	-0.0455	0.5082	0.6298	0.283	0.1334			YSCWHEKA	631	638		-0.0354	-0.2034	-0.0591	-0.0405	0.0103		YSCWHEKA	631	638		-0.0354	-0.2034	-0.0591	-0.0405	0.0103				PQGVIRHYVVC	327	337	11
YVVCSTPQSQY	334	344		0.0763	0.2987	0.6318	0.6468	0.3719	-0.0716			YSCWHEKADERPSF	631	644		0.028	0.0298	-0.0059	0.0809	0.0805		YSCWHEKADERPSF	631	644		0.028	0.0298	-0.0059	0.0809	0.0805				YVVCSTPQSQ	334	343	10
CSTPQSQY	337	344		0.0136	0.1075	0.3673	0.2878	0.001	-0.0472			SCWHEKADERPSF	632	644		0.0156	0.065	-0.0664	0.0376	0.0559		SCWHEKADERPSF	632	644		0.0156	0.065	-0.0664	0.0376	0.0559				YVVCSTPQSQY	334	344	11
STPQSQY	338	344		-0.0001	0.1058	0.2889	0.2292	-0.0051	-0.0011			CWHEKADERPSF	633	644		-0.0287	0.0573	-0.0302	0.065	0.0009		CWHEKADERPSF	633	644		-0.0287	0.0573	-0.0302	0.065	0.0009				CSTPQSQY	337	344	8
YYLAEKHLFSTI	344	355		0.0524	0.1252	0.3753	0.4508	0.0965	0.0322			HEKADERPSF	635	644		0.074	0.081	0.0123	0.0861	0.1412		HEKADERPSF	635	644		0.074	0.081	0.0123	0.0861	0.1412				STPQSQY	338	344	7
YLAEKHLFSTI	345	355		-0.0197	0.1612	0.2374	0.2108	-0.0141	0.0504																									YYLAEKHLFSTI	344	355	12
YYLAEKHLFSTIPEL	344	358		-0.0014	0.1281	0.3756	0.4772	0.2573	-0.0202																									YYLAEKHLFSTIPEL	344	358	15
YLAEKHLFSTIPEL	345	358		0.0613	0.1349	0.3342	0.4428	0.2591	0.0211																									YLAEKHLFSTI	345	355	11
YLAEKHLFSTIPELINY	345	361		-0.2484	0.0041	0.7127	1.0753	0.5952	0.0458																									YLAEKHLFSTIPEL	345	358	14
FSTIPEL	352	358		-0.0119	0.0445	0.1754	0.2016	0.185	0.0081																									YLAEKHLFSTIPELINY	345	361	17
INYHQHNSAGL	359	369		-0.0229	0.0518	0.3562	0.4537	0.0614	0.0457																									FSTIPEL	352	358	7
NYHQHNSAGL	360	369		-0.0435	0.0476	0.3172	0.3389	0.0576	-0.0139																									INYHQHNSAGL	359	369	11
YHQHNSAGL	361	369		0.0922	0.0993	0.3446	0.2561	-0.0044	-0.0043																									NYHQHNSAGL	360	369	10
ISRLKYPVSKQNKNAPST	370	387		0.075	0.553	0.822	0.2202	-0.0611	-0.049																									YHQHNSAGL	361	369	9
ISRLKYPVSKQNKNAPSTAGL	370	390		0.3275	0.7315	0.9409	0.536	0.0098	0.034																									ISRLKYPVSKQNKNAPST	370	387	18
ISRLKYPVSKQNKNAPSTAGLG	370	391		0.247	0.7759	0.8539	0.4708	0.0092	0.0895																									ISRLKYPVSKQNKNAPSTAGL	370	390	21
ISRLKYPVSKQNKNAPSTAGLGY	370	392		0.1569	0.8164	0.9831	0.5453	-0.012	0.0157																									ISRLKYPVSKQNKNAPSTAGLG	370	391	22
ISRLKYPVSKQNKNAPSTAGLGYGSW	370	395		0.3231	0.7637	1.014	0.5147	0.0374	-0.0345																									ISRLKYPVSKQNKNAPSTAGLGY	370	392	23
KQNKNAPSTAGLGYGSW	379	395		0.006	-0.0962	-0.1082	-0.2009	0.0008	-0.1035																									ISRLKYPVSKQNKNAPSTAGLGYGSW	370	395	26
EIDPKDLTF	396	404		-0.0823	-0.0713	-0.2126	-0.2916	-0.1054	0.001																									KQNKNAPSTAGLGYGSW	379	395	17
EIDPKDLTFL	396	405		-0.0357	-0.0054	-0.217	-0.3056	-0.083	-0.0136																									EIDPKDLTF	396	404	9
DPKDLTF	398	404		-0.0683	-0.0812	-0.1612	-0.2522	-0.1114	-0.0444																									EIDPKDLTFL	396	405	10
FLKELGTGQF	404	413		-0.8505	-0.8103	-0.5171	-0.366	-0.069	-0.1045																									DPKDLTF	398	404	7
KELGTGQF	406	413		-0.5778	-0.6318	-0.4837	-0.3639	-0.0929	-0.0655																									FLKELGTGQF	404	413	10
LKELGTGQFGVVKYGKWRGQY	405	425		-0.9381	-1.0147	-1.808	-1.9722	-2.7425	-2.5049																									LKELGTGQFGVVKYGKWRGQY	405	425	21
GVVKYGKW	414	421		-0.0263	-0.4132	-0.9469	-1.6159	-2.31	-2.1888																									KELGTGQF	406	413	8
GVVKYGKWRGQY	414	425		0.0245	-0.396	-1.2226	-1.6743	-2.4745	-2.4555																									GVVKYGKW	414	421	8
VKYGKWRGQY	416	425		-0.008	-0.3158	-0.8782	-1.2399	-1.9168	-1.8703																									GVVKYGKWRGQY	414	425	12
GVVKYGKWRGQYDVA	414	428		0.0573	-0.3151	-0.979	-1.5025	-2.2769	-2.2955																									GVVKYGKWRGQYDVA	414	428	15
KYGKWRGQY	417	425		-0.006	-0.3057	-0.9801	-1.4946	-1.8534	-2.3444																									VKYGKWRGQY	416	425	10
IREGSMSE	432	439		0.02	-0.0521	-0.0094	-0.0476	-0.0295	0.0135																									KYGKWRGQY	417	425	9
IREGSMSED	432	440		0.1127	0.2118	-0.0538	0.1013	0.1533	0.0947																									IREGSMSE	432	439	8
IREGSMSEDE	432	441		0.0392	0.0044	-0.0492	-0.0671	0.0875	0.0054																									IREGSMSED	432	440	9
IREGSMSEDEF	432	442		0.0924	0.2063	0.1802	0.1213	0.0242	0.0188																									IREGSMSEDE	432	441	10
IEEAKVMMNLSHEKL	443	457		0.1832	0.1712	0.2597	0.2769	0.5551	-0.0366																									IREGSMSEDEF	432	442	11
AKVMMNLSHEKL	446	457		0.1493	0.2362	0.313	0.1898	0.18	0.1077																									IEEAKVMMNLSHEKL	443	457	15
KVMMNLSHEKL	447	457		0.1258	0.2405	0.2141	0.2079	0.2795	0.1294																									AKVMMNLSHEKL	446	457	12
MNLSHEKL	450	457		0.0985	0.0184	0.0533	0.24	0.3488	0.0498																									KVMMNLSHEKL	447	457	11
NLSHEKL	451	457		0.1397	0.1028	0.1576	0.1977	0.3194	0.0511																									MNLSHEKL	450	457	8
GVCTKQRPIF	462	471		0.0181	0.0293	0.0715	0.0746	0.1295	-0.0307																									NLSHEKL	451	457	7
YGVCTKQRPIFIIT	461	474		-0.0276	0.0053	0.0599	0.0521	0.0339	-0.0716																									YGVCTKQRPIFIIT	461	474	14
YGVCTKQRPIFIITE	461	475		-0.0452	0.1059	0.1477	0.0805	0.1868	-0.0725																									YGVCTKQRPIFIITE	461	475	15
TKQRPIF	465	471		0.0262	0.0178	-0.0001	-0.011	-0.0227	-0.0286																									GVCTKQRPIF	462	471	10
TKQRPIFIIT	465	474		-0.213	-0.194	-0.152	-0.4123	-0.2018	0.019																									TKQRPIF	465	471	7
LREMRHRFQTQQL	486	498		-0.1171	-0.0587	-0.0625	-0.1593	-0.0294	-0.0219																									TKQRPIFIIT	465	474	10
MRHRFQTQQL	489	498		-0.0708	-0.0437	-0.042	-0.0497	-0.0397	0.0208																									EYMANGCL	475	482	8
MCKDVCE	501	507		-0.1405	-0.1419	-0.0423	-0.0913	-0.0784	-0.018																									YMANGCL	476	482	7
MCKDVCEA	501	508		-0.1029	-0.0516	-0.0096	0.0584	0.0624	0.0843																									YMANGCLL	476	483	8
CKDVCEA	502	508		-0.0419	-0.083	-0.0174	-0.0623	-0.0246	-0.0178																									MANGCLL	477	483	7
MEYLESKQFL	509	518		0.0222	0.0382	-0.1663	-0.1551	-0.1989	-0.1266																									LREMRHRFQTQQL	486	498	13
EYLESKQFL	510	518		-0.0438	0.0578	-0.1661	-0.1579	-0.1623	-0.2279																									MRHRFQTQQL	489	498	10
YLESKQFL	511	518		0.0577	0.1598	-0.077	-0.1255	-0.1109	-0.2206																									MCKDVCE	501	507	7
EYLESKQFLHRDLAARNCL	510	528		0.0777	0.0742	0.1373	-0.2367		-0.6496																									MCKDVCEA	501	508	8
YLESKQFLHRDLAARNCL	511	528		0.0283	0.183	0.1989	-0.0055	-0.2895	-0.3583																									CKDVCEA	502	508	7
FLHRDLAA	517	524		-0.0895	-0.042	-0.0408	-0.0829	-0.1439	-0.1577																									MEYLESKQFL	509	518	10
FLHRDLAARN	517	526		0.1094	0.199	0.5328	0.0234	-0.0539	0.0205																									EYLESKQFL	510	518	9
FLHRDLAARNCL	517	528		0.1599	0.1489	0.2844	0.1919	-0.0712	-0.1246																									EYLESKQFLHRDLAARNCL	510	528	19
HRDLAARN	519	526		0.0669	0.1628	-0.0201	0.2203	-0.0494	-0.1307																									YLESKQFL	511	518	8
HRDLAARNCL	519	528		-0.0244	0.0663	0.2465	0.2105	-0.0468	-0.1864																									YLESKQFLHRDLAARNCL	511	528	18
RNCLVNDQGVVKVSDF	525	540		-0.7054	-0.7933	-0.9611	-1.006	-1.0494	-1.3188																									FLHRDLAA	517	524	8
CLVNDQGVVKVSD	527	539		-0.7258	-0.7042	-0.5096	-0.5495	-0.3883	-0.616																									FLHRDLAARN	517	526	10
CLVNDQGVVKVSDF	527	540		-0.7022	-0.8215	-0.9871	-1.0819	-1.1158	-1.2778																									FLHRDLAARNCL	517	528	12
LVNDQGVVKVSDF	528	540		-0.0034	-0.0259	0.0325	-0.0214	-0.0272	-0.0154																									HRDLAARN	519	526	8
VNDQGVVKVSD	529	539		-0.7022	-0.7198	-0.5735	-0.5184	-0.3003	-0.6049																									HRDLAARNCL	519	528	10
CLVNDQGVVKVSDFGL	527	542		-0.0397	0.1305	0.4458	0.4287	0.1608	-0.0134																									RNCLVNDQGVVKVSDF	525	540	16
VNDQGVVKVSDF	529	540		-0.5162	-0.7115		-0.8811	-0.8807	-1.0483																									CLVNDQGVVKVSD	527	539	13
VNDQGVVKVSDFGL	529	542		-0.6337	-1.2212	-1.6692	-1.5934	-1.0369	-1.0207																									CLVNDQGVVKVSDF	527	540	14
VNDQGVVKVSDFGLS	529	543		-0.8051	-1.3465	-1.7336	-1.6926	-1.0578	-1.1012																									CLVNDQGVVKVSDFGL	527	542	16
VNDQGVVKVSDFGLSR	529	544			-1.4155	-1.851	-2.0549	-1.2173	-1.4051																									LVNDQGVVKVSDF	528	540	13
VNDQGVVKVSDFGLSRY	529	545		-0.8511	-1.3195	-1.7788	-1.7647	-1.0816	-1.1102																									VNDQGVVKVSD	529	539	11
VVKVSDF	534	540		-0.459	-0.7012	-0.9366	-1.0347	-1.04	-1.1494																									VNDQGVVKVSDF	529	540	12
VNDQGVVKVSDFGLSRYVL	529	547		-0.8112	-1.256	-1.6402	-1.589	-0.9541	-1.1967																									VNDQGVVKVSDFGL	529	542	14
VVKVSDFGL	534	542		-0.5826	-1.1996	-1.8706	-1.8297	-1.1489	-1.1847																									VNDQGVVKVSDFGLS	529	543	15
VNDQGVVKVSDFGLSRYVLDD	529	549		-0.7103	-1.0988	-1.5884	-1.5741	-1.1272	-0.9978																									VNDQGVVKVSDFGLSR	529	544	16
VNDQGVVKVSDFGLSRYVLDDE	529	550		-0.6653	-0.931	-1.3756	-1.5103	-0.8769	-0.8932																									VNDQGVVKVSDFGLSRY	529	545	17
FGLSRYVL	540	547		-0.1784	-0.3349	-0.3866	-0.4053	-0.0552	0.0194																									VNDQGVVKVSDFGLSRYVL	529	547	19
GLSRYVL	541	547		-0.1333	-0.1591	-0.0687	-0.0704	0.013	-0.0099																									VNDQGVVKVSDFGLSRYVLDD	529	549	21
FGLSRYVLDD	540	549		-0.1318	-0.3006	-0.3091	-0.2912	0.0234	0.0412																									VNDQGVVKVSDFGLSRYVLDDE	529	550	22
FGLSRYVLDDE	540	550		-0.245	-0.4166	-0.3636	-0.3806	-0.1674	0.0089																									VVKVSDF	534	540	7
GLSRYVLDD	541	549		0.0174	-0.2086	0.2321	0.1281	0.1981	0.1073																									VVKVSDFGL	534	542	9
GLSRYVLDDE	541	550		-0.1862	-0.0727	-0.0647	-0.0608	-0.0807	-0.0365																									FGLSRYVL	540	547	8
SRYVLDD	543	549		-0.02	-0.144	-0.2215	0.0032	-0.1026	-0.0817																									FGLSRYVLDD	540	549	10
SRYVLDDE	543	550		0.0124	-0.0708	-0.1139	-0.06	-0.0265	-0.103																									FGLSRYVLDDE	540	550	11
EYTSSVGSKF	550	559		0.0685	0.1117	0.1282	0.0216	0.131	0.0761																									GLSRYVL	541	547	7
YTSSVGSKF	551	559		0.0113	0.04	0.0054	-0.0172	0.0514	-0.0469																									GLSRYVLDD	541	549	9
TSSVGSKF	552	559		-0.1016	-0.0831	-0.1153	-0.2729	-0.0632	-0.1784																									GLSRYVLDDE	541	550	10
EYTSSVGSKFPVRWSPPEVL	550	569		-0.0277	0.0466	0.1273	0.2465	0.0529	-0.0058																									SRYVLDD	543	549	7
YTSSVGSKFPVRWSPPEVL	551	569		0.0438	0.0794	0.1725	0.3093	-0.0381	-0.0765																									SRYVLDDE	543	550	8
TSSVGSKFPVRWSPPEVL	552	569		-0.0665	-0.0999	0.1286	0.1746	-0.0614	-0.199																									EYTSSVGSKF	550	559	10
PVRWSPPEVL	560	569		0.0251	0.0648	0.3629	0.4	0.0718	0.0041																									EYTSSVGSKFPVRWSPPEVL	550	569	20
YSKFSSKSDI	571	580		-0.1817	-0.1272	-0.1	-0.0913	-0.0107	0.1299																									YTSSVGSKF	551	559	9
MYSKFSSKSDIWA	570	582		-0.2154	-0.1792	-0.0949	-0.149	-0.1557	-0.1568																									YTSSVGSKFPVRWSPPEVL	551	569	19
MYSKFSSKSDIWAF	570	583		-0.1191	0.0862	0.086	-0.233	-0.0429	-0.0621																									TSSVGSKF	552	559	8
YSKFSSKSDIWA	571	582		-0.1616	-0.1953	-0.1546	-0.1391	-0.1054	-0.1075																									TSSVGSKFPVRWSPPEVL	552	569	18
YSKFSSKSDIWAF	571	583		-0.1063	-0.191	-0.111	-0.0851	-0.0978	-0.1352																									PVRWSPPEVL	560	569	10
SSKSDIWA	575	582		0.0056	-0.0004	-0.0671	-0.0764	-0.0409	-0.0648																									MYSKFSSKSDIWA	570	582	13
SSKSDIWAF	575	583		-0.0504	-0.0177	-0.1085	-0.1036	-0.087	-0.1201																									MYSKFSSKSDIWAF	570	583	14
MWEIYSL	587	593		-0.0043	-0.0252	-0.0075	0.008	0.0263	0.038																									YSKFSSKSDI	571	580	10
WEIYSLGKM	588	596		0.0072	0.0023	0.0431	0.3113	0.2037	0.1557																									YSKFSSKSDIWA	571	582	12
WEIYSLGKMPYE	588	599		-0.0259	0.0551	0.0875	0.1866	0.1989	0.0694																									YSKFSSKSDIWAF	571	583	13
MWEIYSLGKMPYERF	587	601		0.0288	0.1971	0.1699	0.1745	0.2385	0.0701																									SSKSDIWA	575	582	8
WEIYSLGKMPYERF	588	601		0.0924	0.2255	0.1808	0.2227	0.2159	0.1015																									SSKSDIWAF	575	583	9
IYSLGKMPYERF	590	601		-0.0616	0.2073	0.043	0.2782	0.1916	0.12																									MWEIYSL	587	593	7
MWEIYSLGKMPYERFTNSE	587	605		0.0507	0.4207	0.1762	0.2497	0.2697	0.1485																									MWEIYSLGKMPYERF	587	601	15
WEIYSLGKMPYERFTNS	588	604		0.157	0.3042	0.2073	0.2079	0.2815	0.1752																									MWEIYSLGKMPYERFTNSE	587	605	19
WEIYSLGKMPYERFTNSE	588	605		0.2194	0.326	0.1667	0.2658	0.3268	0.25																									WEIYSLGKM	588	596	9
SLGKMPYERF	592	601		-0.1296	0.271	0.1358	0.1741	0.0326	0.0618																									WEIYSLGKMPYE	588	599	12
IYSLGKMPYERFTNS	590	604		-0.1388	0.3102	0.3065	-0.0741	0.3951	0.2447																									WEIYSLGKMPYERF	588	601	14
IYSLGKMPYERFTNSE	590	605		0.1438	0.4141	0.0348	0.1215	0.223	0.1294																									WEIYSLGKMPYERFTNS	588	604	17
GKMPYERF	594	601		0.0756	0.1634	0.0352	0.1325	0.0349	0.0155																									WEIYSLGKMPYERFTNSE	588	605	18
WEIYSLGKMPYERFTNSETAE	588	608		0.1175	0.795	0.3588	0.4963	0.3057	0.1391																									WEIYSLGKMPYERFTNSETAE	588	608	21
IYSLGKMPYERFTNSETAE	590	608		0.4101	0.7321	0.4158	0.2975	0.455	0.1264																									IYSLGKMPYERF	590	601	12
GKMPYERFTNSE	594	605		0.2776	0.3049	0.0453	-0.0566	0.0012	0.0934																									IYSLGKMPYERFTNS	590	604	15
IYSLGKMPYERFTNSETAEHIA	590	611		-0.0399	-0.0571	-0.052	-0.1753	-0.2367	0.0936																									IYSLGKMPYERFTNSE	590	605	16
GKMPYERFTNSETAE	594	608		0.2853	0.6904	0.3715	0.0631	0.1071	0.0921																									IYSLGKMPYERFTNSETAE	590	608	19
RFTNSETAE	600	608		0.2597	0.5041	0.3351	0.0903	0.1068	0.1382																									IYSLGKMPYERFTNSETAEHIA	590	611	22
TAEHIAQG	606	613		0.0919	0.4041	0.6185	0.4156	0.086	0.0332																									SLGKMPYERF	592	601	10
TAEHIAQGLRLPRPHL	606	621		0.0922	0.5032	0.5116	0.3783	0.0693	0.0701																									GKMPYERF	594	601	8
AEHIAQGLRLPRPHL	607	621		-0.0532	0.1005	0.3998		-0.1165																										GKMPYERFTNSE	594	605	12
TAEHIAQGLRLPRPHLAS	606	623		0.1269	0.2183	0.5042	0.4313	0.0986	0.1077																									GKMPYERFTNSETAE	594	608	15
TAEHIAQGLRLPRPHLASE	606	624		0.0398	0.4824	0.5136	0.2947	0.037	-0.047																									RFTNSETAE	600	608	9
AEHIAQGLRLPRPHLAS	607	623		0.058	0.292	0.4314	0.3364	0.3125	0.1749																									TAEHIAQG	606	613	8
HIAQGLRLPRPHL	609	621		0.0432	0.2866	0.2687	0.1107	0.1543	0.1839																									TAEHIAQGLRLPRPHL	606	621	16
HIAQGLRLPRPHLAS	609	623		0.018	0.256	0.3206	0.1273	0.0253	0.1877																									TAEHIAQGLRLPRPHLAS	606	623	18
HIAQGLRLPRPHLASE	609	624		-0.0006	0.2978	0.2601	0.1303	0.1573	0.2152																									TAEHIAQGLRLPRPHLASE	606	624	19
HIAQGLRLPRPHLASERV	609	626		-0.0958	0.0936	0.1597	0.0937	0.1004	0.0097																									AEHIAQGLRLPRPHL	607	621	15
LRLPRPHLAS	614	623		0.0176	0.0371	-0.002	0.0042	0.1033	0.1092																									AEHIAQGLRLPRPHLAS	607	623	17
LRLPRPHLASE	614	624		-0.0228	0.036	-0.0328	-0.0141	0.11	0.1604																									HIAQGLRLPRPHL	609	621	13
ERVYTIM	624	630		-0.0329	-0.0496	-0.0296	-0.0243	-0.1435	-0.133																									HIAQGLRLPRPHLAS	609	623	15
YSCWHEKA	631	638		-0.0354	-0.2034	-0.0509	-0.0591	-0.0405	0.0103																									HIAQGLRLPRPHLASE	609	624	16
SCWHEKA	632	638		0.0013	0.0082	-0.0416	0.0541	-0.0769	0.0049																									HIAQGLRLPRPHLASERV	609	626	18
YSCWHEKADERPSF	631	644		0.028	0.0298	-0.0062	-0.0059	0.0809	0.0805																									LRLPRPHLAS	614	623	10
SCWHEKADERPSF	632	644		0.0156	0.065	-0.0269	-0.0664	0.0376	0.0559																									LRLPRPHLASE	614	624	11
CWHEKADERPSF	633	644		-0.0287	0.0573	-0.0515	-0.0302	0.065	0.0009																									ERVYTIM	624	630	7
WHEKADERPSF	634	644		-0.0293	-0.059	-0.0427	0.0463	-0.0054	0.067																									YSCWHEKA	631	638	8
HEKADERPSF	635	644		0.074	0.081	0.0113	0.0123	0.0861	0.1412																									YSCWHEKADERPSF	631	644	14
KILLSNIL	645	652		-0.0254	-0.0384	-0.0113	-0.0389	-0.004	0.0189																									SCWHEKA	632	638	7
KILLSNILD	645	653		-0.0181	-0.0173	-0.0063	0.0174	0.0808	0.0632																									SCWHEKADERPSF	632	644	13
KILLSNILDV	645	654		-0.1022	-0.0766	-0.0535	-0.0913	0.0023	0.009																									CWHEKADERPSF	633	644	12
																																		WHEKADERPSF	634	644	11
																																		HEKADERPSF	635	644	10
																																		KILLSNIL	645	652	8
																																		KILLSNILD	645	653	9
																																		KILLSNILDV	645	654	10
																																					13.3347

## Sheet: Figure 8-figure supplement 2
	Peptide					Relative Deuterium Incorporation												Relative Difference in Deuterium Incorporation																	Peptide coverage
	Index					wt						T316A						wt Difference					T316A Difference					DeltaDelta
	Number	Sequence	Start	End		0:1	0.2:1	0.5:1	1:1	2:1		0:1	0.2:1	0.5:1	1:1	2:1		0.2:1	0.5:1	1:1	2:1		0.2:1	0.5:1	1:1	2:1		0.2:1	0.5:1	1:1	2:1				Sequence	Start	End	Length
	1	AAVILES	2	8		3.30798	3.34283	3.44508	3.33716	3.36127		3.45538	3.41595	3.39648	3.42982	3.34257		0.034855	0.137098	0.029176	0.053291		-0.039423	-0.058896	-0.02556	-0.112804		-0.074278	-0.195994	-0.054736	-0.166095				AAVILES	2	8	7
	2	IFLKRSQQKKKTSPLNF	9	25		5.84749	5.94976	5.9178	5.76626	5.83405		6.13049	6.00901	6.03744	6.00129	5.90682		0.102268	0.070311	-0.081233	-0.013446		-0.121485	-0.093054	-0.129206	-0.22367		-0.223753	-0.163365	-0.047973	-0.210224				IFLKRSQQKKKTSPLNF	9	25	17
	3	LKRSQQKKKTSPLN	11	24		7.24887	7.27721	7.18186	7.17004	7.18695		7.33159	7.30598	7.27354	7.15532	7.26963		0.028344	-0.067008	-0.078823	-0.061914		-0.025616	-0.058047	-0.176268	-0.06196		-0.05396	0.008961	-0.097445	-4.6e-05				LKRSQQKKKTSPLN	11	24	14
	4	LKRSQQKKKTSPLNF	11	25		5.96655	6.11937	6.10258	6.01912	6.1023		6.07595	6.10957	6.18605	6.16744	6.17274		0.152818	0.136027	0.052565	0.135748		0.033619	0.110106	0.091498	0.096791		-0.119199	-0.025921	0.038933	-0.038957				LKRSQQKKKTSPLNF	11	25	15
	5	LKRSQQKKKTSPLNFKKRLFL	11	31		6.26859	6.7589	6.6309	6.22895	6.34309		6.71002	6.82179	6.85515	6.46772	6.66103		0.490305	0.362303	-0.03964	0.074495		0.111766	0.145127	-0.242304	-0.048989		-0.378539	-0.217176	-0.202664	-0.123484				LKRSQQKKKTSPLNFKKRLFL	11	31	21
	6	LTVHKLSY	32	39		1.25467	1.26359	1.26875	1.25857	1.26191		1.31855	1.31576	1.32885	1.32756	1.30419		0.008926	0.014083	0.003906	0.00724		-0.002787	0.010296	0.009007	-0.014356		-0.011713	-0.003787	0.005101	-0.021596				LTVHKLSY	32	39	8
	7	LTVHKLSYYE	32	41		2.20623	2.11494	2.28527	2.1751	2.18727		2.16919	2.29812	2.30393	2.3404	2.22451		-0.091296	0.079032	-0.031137	-0.018963		0.128931	0.13474	0.171204	0.055323		0.220227	0.055708	0.202341	0.074286				LTVHKLSYYE	32	41	10
	8	TVHKLSY	33	39		1.25348	1.2184	1.22825	1.21428	1.23715		1.30166	1.28991	1.27952	1.26966	1.26412		-0.035081	-0.025237	-0.039205	-0.016335		-0.011751	-0.022148	-0.032005	-0.037548		0.02333	0.003089	0.0072	-0.021213				TVHKLSY	33	39	7
	9	FERGRRGSKKGSIDVE	44	59		5.94001	6.16458	6.10965	6.04049	6.04565		6.12363	6.1256	6.2006	6.15811	6.08742		0.224565	0.16964	0.100476	0.105636		0.001971	0.076972	0.034487	-0.036203		-0.222594	-0.092668	-0.065989	-0.141839				FERGRRGSKKGSIDVE	44	59	16
	10	FERGRRGSKKGSIDVEKITC	44	63		5.19223	5.31738	5.32015	5.15151	5.20709		5.4811	5.51914	5.47762	5.33008	5.42955		0.125144	0.12792	-0.040728	0.014853		0.038041	-0.003476	-0.15102	-0.051551		-0.087103	-0.131396	-0.110292	-0.066404				FERGRRGSKKGSIDVEKITC	44	63	20
	11	VEKITCVE	58	65		0.848921	0.810975	0.804567	0.82852	0.839258		0.823627	0.846436	0.877296	0.860169	0.83241		-0.037946	-0.044354	-0.020401	-0.009663		0.022809	0.053669	0.036542	0.008783		0.060755	0.098023	0.056943	0.018446				VEKITCVE	58	65	8
	12	VETVIPEKNPPPERQIPRRGEE	64	85		9.27657	9.28819	9.30893	9.13874	9.22549		9.43234	9.39933	9.38229	9.16486	9.29694		0.011621	0.032358	-0.137829	-0.051082		-0.033013	-0.050049	-0.267485	-0.135399		-0.044634	-0.082407	-0.129656	-0.084317				VETVIPEKNPPPERQIPRRGEE	64	85	22
	13	VETVIPEKNPPPERQIPRRGEESSE	64	88		10.7681	10.8353	10.7802	10.6057	10.6528		10.9893	10.8749	10.8647	10.6616	10.7749		0.067185	0.012118	-0.162402	-0.115324		-0.114369	-0.124579	-0.327667	-0.214326		-0.181554	-0.136697	-0.165265	-0.099002				VETVIPEKNPPPERQIPRRGEESSE	64	88	25
	14	VETVIPEKNPPPERQIPRRGEESSEM	64	89		11.151	11.2216	11.1675	10.9905	11.0832		11.3064	11.2056	11.2459	11.039	11.2091		0.070625	0.016488	-0.160446	-0.067833		-0.100878	-0.060501	-0.267451	-0.097318		-0.171503	-0.076989	-0.107005	-0.029485				VETVIPEKNPPPERQIPRRGEESSEM	64	89	26
	15	TVIPEKNPPPERQIPRRGEE	66	85		8.54293	8.49065	8.45627	8.33683	8.40979		8.67735	8.56532	8.51897	8.35721	8.53153		-0.052275	-0.086656	-0.206094	-0.133132		-0.11203	-0.15838	-0.320135	-0.145823		-0.059755	-0.071724	-0.114041	-0.012691				TVIPEKNPPPERQIPRRGEE	66	85	20
	16	TVIPEKNPPPERQIPRRGEESSE	66	88		9.98595	9.92125	9.9077	9.77701	9.8709		10.1658	10.1709	10.0159	10.0088	10.2675		-0.064703	-0.078257	-0.208945	-0.115058		0.005136	-0.14991	-0.156966	0.101757		0.069839	-0.071653	0.051979	0.216815				TVIPEKNPPPERQIPRRGEESSE	66	88	23
	17	TVIPEKNPPPERQIPRRGEESSEM	66	89		10.3893	10.4497	10.4078	10.1767	10.3204		10.5347	10.4752	10.3614	10.3229	10.233		0.060362	0.018507	-0.212581	-0.068962		-0.05952	-0.1733	-0.211767	-0.301722		-0.119882	-0.191807	0.000814	-0.23276				TVIPEKNPPPERQIPRRGEESSEM	66	89	24
	18	ISIIERFPYPFQ	92	103		3.89704	3.96077	3.95179	3.96733	3.9144		4.00565	4.02319	4.05018	3.98145	3.90456		0.063728	0.054743	0.070286	0.017359		0.017542	0.044529	-0.024198	-0.101084		-0.046186	-0.010214	-0.094484	-0.118443				ISIIERFPYPFQ	92	103	12
	19	ISIIERFPYPFQVVYDEGPLYVFSPTEELRKRWIHQLKNVIRYNSDL	92	138		16.5178	16.1601	15.9975	15.9706	16.1945		16.2304	15.9565	15.6868	15.7453	15.9497		-0.357695	-0.520321	-0.547212	-0.323307		-0.273939	-0.543583	-0.485161	-0.280687		0.083756	-0.023262	0.062051	0.04262				ISIIERFPYPFQVVYDEGPLYVFSPTEELRKRWIHQLKNVIRYNSDL	92	138	47
	20	IIERFPYPFQ	94	103		1.881	1.87867	1.88606	1.89868	1.89597		1.89494	1.92473	1.93453	1.93498	1.91997		-0.002337	0.00506	0.017676	0.014972		0.029787	0.039587	0.040034	0.025024		0.032124	0.034527	0.022358	0.010052				IIERFPYPFQ	94	103	10
	21	IIERFPYPFQVVY	94	106		2.86463	2.8118	2.75595	2.81252	2.83149		2.76528	2.82809	2.77182	2.69821	2.7214		-0.05283	-0.108681	-0.052113	-0.033142		0.06281	0.006538	-0.067079	-0.043886		0.11564	0.115219	-0.014966	-0.010744				IIERFPYPFQVVY	94	106	13
	22	IIERFPYPFQVVYDEGPLYVFSPTEELRKRWIHQLKNVIRYNSDL	94	138		14.0309	14.1229	14.0873	14.0415	14.053		13.9636	13.9584	13.9651	13.8425	13.8248		0.092049	0.056484	0.010689	0.022188		-0.005193	0.001556	-0.121091	-0.138757		-0.097242	-0.054928	-0.13178	-0.160945				IIERFPYPFQVVYDEGPLYVFSPTEELRKRWIHQLKNVIRYNSDL	94	138	45
	23	IERFPYPFQ	95	103		1.18639	1.18602	1.21774	1.23188	1.21566		1.23491	1.27372	1.28663	1.28841	1.24266		-0.000373	0.031342	0.045488	0.029272		0.038804	0.051711	0.053499	0.007745		0.039177	0.020369	0.008011	-0.021527				IERFPYPFQ	95	103	9
	24	VVYDEGPL	104	111		1.96398	2.00884	1.97433	1.99033	1.98228		1.96288	1.99812	2.03024	1.99811	2.00204		0.044862	0.010346	0.026346	0.018299		0.035231	0.067355	0.035222	0.039156		-0.009631	0.057009	0.008876	0.020857				VVYDEGPL	104	111	8
	25	VVYDEGPLY	104	112		2.79693	2.80746	2.79006	2.7729	2.76793		2.84522	2.82057	2.80338	2.79314	2.7755		0.010534	-0.006869	-0.024028	-0.028995		-0.024648	-0.04184	-0.052084	-0.069726		-0.035182	-0.034971	-0.028056	-0.040731				VVYDEGPLY	104	112	9
	26	VVYDEGPLYVF	104	114		2.62525	2.58961	2.63022	2.51897	2.54348		2.46159	2.49871	2.4541	2.40568	2.37059		-0.035634	0.004979	-0.106275	-0.081761		0.037121	-0.007486	-0.055909	-0.091		0.072755	-0.012465	0.050366	-0.009239				VVYDEGPLYVF	104	114	11
	27	VVYDEGPLYVFSPTEE	104	119		4.4757	4.52693	4.506	4.46291	4.48542		4.45897	4.42872	4.52289	4.47454	4.44146		0.05122	0.030292	-0.012798	0.009714		-0.030251	0.063917	0.015568	-0.017517		-0.081471	0.033625	0.028366	-0.027231				VVYDEGPLYVFSPTEE	104	119	16
	28	VVYDEGPLYVFSPTEEL	104	120		5.51947	5.51782	5.50428	5.46493	5.38508		5.66774	5.543	5.43968	5.37386	5.5124		-0.001657	-0.01519	-0.05454	-0.134389		-0.124738	-0.228058	-0.293882	-0.155334		-0.123081	-0.212868	-0.239342	-0.020945				VVYDEGPLYVFSPTEEL	104	120	17
	29	DEGPLYVFSPTEE	107	119		3.11399	3.10675	3.08176	3.16044	3.23886		3.32582	3.42699	3.22208	3.32461	3.28765		-0.007247	-0.032229	0.046452	0.124869		0.101175	-0.103736	-0.001211	-0.038163		0.108422	-0.071507	-0.047663	-0.163032				DEGPLYVFSPTEE	107	119	13
	30	LRKRWIHQLKN	120	130		0.415921	0.38308	0.403039	0.395475	0.407077		0.40898	0.389877	0.369118	0.408899	0.33415		-0.032841	-0.012882	-0.020446	-0.008844		-0.019103	-0.039862	-8.1e-05	-0.07483		0.013738	-0.02698	0.020365	-0.065986				LRKRWIHQLKN	120	130	11
	31	VIRYNSDL	131	138		4.10154	4.15452	4.15792	4.08032	4.0062		4.19238	4.11285	4.24963	4.15809	4.17236		0.052973	0.056372	-0.021224	-0.095347		-0.079537	0.05725	-0.034291	-0.020028		-0.13251	0.000878	-0.013067	0.075319				VIRYNSDL	131	138	8
	32	VQKYHPCF	139	146		0.809518	0.783234	0.803512	0.825754	0.785118		0.797851	0.820541	0.794837	0.822332	0.764571		-0.026284	-0.006006	0.016236	-0.0244		0.02269	-0.003014	0.024481	-0.03328		0.048974	0.002992	0.008245	-0.00888				VQKYHPCF	139	146	8
	33	QKYHPCF	140	146		0.684409	0.656704	0.673133	0.654289	0.685736		0.657079	0.654118	0.670119	0.656985	0.665866		-0.027705	-0.011276	-0.03012	0.001327		-0.002961	0.01304	-9.4e-05	0.008787		0.024744	0.024316	0.030026	0.00746				QKYHPCF	140	146	7
	34	WIDGQYL	147	153		1.36105	1.35773	1.33816	1.33214	1.33084		1.35413	1.31015	1.30917	1.26642	1.32094		-0.003311	-0.022883	-0.028911	-0.030202		-0.043983	-0.044964	-0.087711	-0.033194		-0.040672	-0.022081	-0.0588	-0.002992				WIDGQYL	147	153	7
	35	WIDGQYLC	147	154		1.35534	1.3389	1.35746	1.34849	1.3264		1.39666	1.3665	1.36396	1.33807	1.36115		-0.01644	0.002118	-0.006856	-0.028948		-0.030167	-0.032701	-0.05859	-0.035508		-0.013727	-0.034819	-0.051734	-0.00656				WIDGQYLC	147	154	8
	36	LCCSQTAKNAMGCQ	153	166		6.86369	6.87003	6.85334	6.85528	6.79025		6.85733	6.82149	6.89281	6.77037	6.74485		0.006334	-0.010348	-0.008416	-0.07344		-0.035841	0.035478	-0.086955	-0.11248		-0.042175	0.045826	-0.078539	-0.03904				LCCSQTAKNAMGCQ	153	166	14
	37	CCSQTAKNAMGCQ	154	166		6.6453	6.67693	6.6997	6.70212	6.58369		6.61642	6.6517	6.58692	6.56615	6.55449		0.031627	0.054402	0.056822	-0.061607		0.03528	-0.029495	-0.05027	-0.061923		0.003653	-0.083897	-0.107092	-0.000316				CCSQTAKNAMGCQ	154	166	13
	38	CSQTAKNAMGCQ	155	166		6.11316	6.14335	6.09397	6.08878	6.10178		6.08072	6.0509	6.05264	6.06956	6.06054		0.030191	-0.019183	-0.024379	-0.011378		-0.029817	-0.028083	-0.011159	-0.02018		-0.060008	-0.0089	0.01322	-0.008802				CSQTAKNAMGCQ	155	166	12
	39	SQTAKNAMG	156	164		5.75513	5.71482	5.76823	5.68861	5.71694		5.68595	5.68865	5.71505	5.70607	5.63393		-0.040313	0.013096	-0.066518	-0.03819		0.002699	0.029105	0.02012	-0.052019		0.043012	0.016009	0.086638	-0.013829				SQTAKNAMG	156	164	9
	40	SQTAKNAMGC	156	165		5.77233	5.81369	5.77968	5.80277	5.74861		5.78329	5.67729	5.70693	5.71819	5.58115		0.041356	0.007351	0.03044	-0.023719		-0.106008	-0.076365	-0.065109	-0.202144		-0.147364	-0.083716	-0.095549	-0.178425				SQTAKNAMGC	156	165	10
	41	SQTAKNAMGCQ	156	166		5.3355	5.35094	5.34779	5.31759	5.32614		5.24239	5.27136	5.27927	5.27711	5.22796		0.015442	0.01229	-0.017908	-0.009358		0.028973	0.036882	0.034722	-0.014424		0.013531	0.024592	0.05263	-0.005066				SQTAKNAMGCQ	156	166	11
	42	SQTAKNAMGCQIL	156	168		6.79514	6.77687	6.85738	6.77424	6.83647		6.89061	6.83127	6.81692	6.80152	6.86641		-0.01827	0.06224	-0.020893	0.041338		-0.059336	-0.073694	-0.089091	-0.024204		-0.041066	-0.135934	-0.068198	-0.065542				SQTAKNAMGCQIL	156	168	13
	43	ILENRNGSLKPGSS	167	180		7.29837	7.35163	7.2853	7.22098	7.26152		7.40785	7.35216	7.41822	7.23096	7.26834		0.053266	-0.013067	-0.077387	-0.036841		-0.055692	0.010367	-0.17689	-0.139515		-0.108958	0.023434	-0.099503	-0.102674				ILENRNGSLKPGSS	167	180	14
	44	ILENRNGSLKPGSSHRKTKKPLPPTPEE	167	194		9.75851	9.98923	9.84422	9.63116	9.75676		10.1196	9.85468	9.87292	9.79816	9.77607		0.230721	0.085713	-0.127346	-0.001742		-0.264929	-0.246691	-0.321448	-0.343547		-0.49565	-0.332404	-0.194102	-0.341805				ILENRNGSLKPGSSHRKTKKPLPPTPEE	167	194	28
	45	ILENRNGSLKPGSSHRKTKKPLPPTPEED	167	195		10.5392	10.6569	10.6149	10.3941	10.3894		10.8069	10.5838	10.7525	10.447	10.5942		0.117716	0.075696	-0.145062	-0.149785		-0.223087	-0.054428	-0.359914	-0.212739		-0.340803	-0.130124	-0.214852	-0.062954				ILENRNGSLKPGSSHRKTKKPLPPTPEED	167	195	29
	46	ENRNGSLKPGSSHRKTKKPLPPTPEE	169	194		9.08085	9.17379	9.16926	8.96799	8.99019		9.27546	9.20184	9.17373	9.07093	9.2255		0.092934	0.088409	-0.11286	-0.090667		-0.073625	-0.101735	-0.204532	-0.049965		-0.166559	-0.190144	-0.091672	0.040702				ENRNGSLKPGSSHRKTKKPLPPTPEE	169	194	26
	47	DQILKKPLPPEPTAAPIST	195	213		9.3129	9.30548	9.26462	9.27258	9.28013		9.39987	9.32137	9.36719	9.27135	9.19957		-0.007419	-0.048281	-0.040315	-0.032769		-0.078505	-0.032676	-0.12852	-0.200298		-0.071086	0.015605	-0.088205	-0.167529				DQILKKPLPPEPTAAPIST	195	213	19
	48	DQILKKPLPPEPTAAPISTTE	195	215		10.7251	10.7317	10.6989	10.6277	10.6317		10.8397	10.805	10.7974	10.6785	10.663		0.006593	-0.026185	-0.097398	-0.093416		-0.034702	-0.042266	-0.161164	-0.176704		-0.041295	-0.016081	-0.063766	-0.083288				DQILKKPLPPEPTAAPISTTE	195	215	21
	49	DQILKKPLPPEPTAAPISTTEL	195	216		11.8574	11.7848	11.7496	11.6453	11.6327		11.8337	11.6829	11.6644	11.6102	11.5708		-0.072678	-0.107877	-0.212167	-0.224721		-0.150775	-0.169363	-0.223477	-0.262905		-0.078097	-0.061486	-0.01131	-0.038184				DQILKKPLPPEPTAAPISTTEL	195	216	22
	50	QILKKPLPPEPTAAPIST	196	213		8.88261	8.77674	8.89492	8.72414	8.74926		8.89885	8.93877	8.77863	8.77839	8.80724		-0.105872	0.012303	-0.158473	-0.133349		0.039921	-0.120219	-0.120457	-0.091606		0.145793	-0.132522	0.038016	0.041743				QILKKPLPPEPTAAPIST	196	213	18
	51	QILKKPLPPEPTAAPISTTE	196	215		10.2177	10.2799	10.1967	10.1412	10.1318		10.4175	10.2626	10.3551	10.2224	10.2375		0.062253	-0.020915	-0.076421	-0.085861		-0.154856	-0.062407	-0.195042	-0.179942		-0.217109	-0.041492	-0.118621	-0.094081				QILKKPLPPEPTAAPISTTE	196	215	20
	52	ILKKPLPPEPTAAPIST	197	213		7.92478	7.89893	7.93141	7.87384	7.8887		7.97745	7.91625	7.95795	7.88222	7.87742		-0.025849	0.00663	-0.050942	-0.036082		-0.061199	-0.019501	-0.09523	-0.100028		-0.03535	-0.026131	-0.044288	-0.063946				ILKKPLPPEPTAAPIST	197	213	17
	53	ILKKPLPPEPTAAPISTTE	197	215		9.38729	9.38439	9.37816	9.28641	9.30833		9.48157	9.4073	9.38869	9.2909	9.33567		-0.002905	-0.009134	-0.100876	-0.078962		-0.07427	-0.092885	-0.190677	-0.145904		-0.071365	-0.083751	-0.089801	-0.066942				ILKKPLPPEPTAAPISTTE	197	215	19
	54	TELKKVVAL	214	222		2.48151	2.58812	2.64704	2.90478	3.16684		2.68162	2.85662	2.87048	3.15146	3.42471		0.106603	0.165527	0.423265	0.685326		0.175003	0.188864	0.469839	0.743089		0.0684	0.023337	0.046574	0.057763				TELKKVVAL	214	222	9
	55	LKKVVAL	216	222		0.861921	0.917717	1.02159	1.2555	1.39515		1.00945	1.17348	1.19665	1.43946	1.63114		0.055796	0.159668	0.393576	0.533231		0.164036	0.187205	0.430008	0.621687		0.10824	0.027537	0.036432	0.088456				LKKVVAL	216	222	7
	56	LYDYMPMNAND	222	232		3.98141	4.00528	3.90247	4.03954	4.26894		4.20487	4.13321	4.21717	4.25888	4.38006		0.023877	-0.078935	0.058132	0.287533		-0.071664	0.012296	0.054007	0.175187		-0.095541	0.091231	-0.004125	-0.112346				LYDYMPMNAND	222	232	11
	57	YDYMPMNA	223	230		2.50394	2.52974	2.59294	2.59888	2.60934		2.53645	2.59316	2.6343	2.61137	2.6629		0.025804	0.088995	0.094937	0.105405		0.056717	0.097856	0.074927	0.126455		0.030913	0.008861	-0.02001	0.02105				YDYMPMNA	223	230	8
	58	YDYMPMNAND	223	232		3.47665	3.51306	3.50633	3.5733	3.74622		3.5569	3.59399	3.60194	3.70613	3.86147		0.036411	0.029678	0.096654	0.269567		0.037082	0.045034	0.14923	0.304562		0.000671	0.015356	0.052576	0.034995				YDYMPMNAND	223	232	10
	59	NDLQLRKGEEY	231	241		1.60601	1.76182	1.88226	2.40134	3.06369		1.84108	2.10662	2.22251	2.89861	3.5448		0.155804	0.276248	0.795324	1.45768		0.26554	0.381427	1.05753	1.70372		0.109736	0.105179	0.262204	0.246041				NDLQLRKGEEY	231	241	11
	60	LQLRKGEE	233	240		1.37328	1.44243	1.57698	1.8732	2.07594		1.49094	1.75907	1.75053	2.16852	2.51748		0.069154	0.2037	0.499926	0.702665		0.268134	0.25959	0.677584	1.02654		0.19898	0.05589	0.177658	0.323875				LQLRKGEE	233	240	8
	61	LQLRKGEEY	233	241		1.24949	1.35244	1.40583	1.76152	2.09121		1.28156	1.53654	1.56546	2.09416	2.34262		0.102951	0.15634	0.51203	0.841722		0.254983	0.283898	0.812607	1.06106		0.152032	0.127558	0.300577	0.219342				LQLRKGEEY	233	241	9
	62	LQLRKGEEYF	233	242		1.20111	1.28264	1.38985	1.64745	2.00836		1.35871	1.56559	1.607	1.94754	2.37087		0.081532	0.188742	0.44634	0.80725		0.206881	0.248296	0.588834	1.01216		0.125349	0.059554	0.142494	0.204915				LQLRKGEEYF	233	242	10
	63	QLRKGEE	234	240		1.28742	1.39101	1.47791	1.78748	2.12224		1.48274	1.63203	1.70452	2.10535	2.30414		0.103587	0.19049	0.500058	0.834822		0.149286	0.221775	0.622612	0.821395		0.045699	0.031285	0.122554	-0.013427				QLRKGEE	234	240	7
	64	QLRKGEEY	234	241		1.12821	1.24784	1.27267	1.5569	1.87227		1.31474	1.53432	1.55534	1.86721	2.25178		0.119625	0.144458	0.428692	0.744064		0.219574	0.240598	0.552467	0.93704		0.099949	0.09614	0.123775	0.192976				QLRKGEEY	234	241	8
	65	RKGEEYF	236	242		0.732976	0.809798	0.833489	0.988829	1.13816		0.840025	0.978761	0.997093	1.15488	1.36565		0.076822	0.100513	0.255853	0.405183		0.138736	0.157068	0.314859	0.525623		0.061914	0.056555	0.059006	0.12044				RKGEEYF	236	242	7
	66	ILEESNLPWWRARDKNGQE	243	261		6.57997	6.731	6.66933	6.95453	7.22164		6.76294	7.05714	7.08135	7.33654	7.71718		0.151021	0.089358	0.374557	0.64167		0.294199	0.31841	0.573604	0.954238		0.143178	0.229052	0.199047	0.312568				ILEESNLPWWRARDKNGQE	243	261	19
	67	ILEESNLPWWRARDKNGQEGYIPSN	243	267		7.33743	7.5669	7.65896	8.12355	8.75576		7.8306	8.07674	8.16609	8.48966	9.44939		0.229467	0.321526	0.786118	1.41833		0.246139	0.335491	0.659064	1.61879		0.016672	0.013965	-0.127054	0.200462				ILEESNLPWWRARDKNGQEGYIPSN	243	267	25
	68	ILEESNLPWWRARDKNGQEGYIPSNY	243	268		7.38198	7.62107	7.68118	8.26679	8.98821		7.86865	8.13701	8.24653	8.8728	9.73015		0.239091	0.299197	0.884806	1.60622		0.268361	0.377882	1.00415	1.86149		0.02927	0.078685	0.119342	0.25527				ILEESNLPWWRARDKNGQEGYIPSNY	243	268	26
	69	EESNLPWWRARDKNGQEGYIPSN	245	267		6.25658	6.46127	6.54557	7.01084	7.65396		6.63405	6.93365	6.97961	7.55919	8.18372		0.204697	0.288995	0.754264	1.39738		0.299593	0.345553	0.925138	1.54966		0.094896	0.056558	0.170874	0.152277				EESNLPWWRARDKNGQEGYIPSN	245	267	23
	70	EESNLPWWRARDKNGQEGYIPSNY	245	268		6.27085	6.53162	6.63026	7.15264	7.86414		6.70558	7.06398	7.06449	7.74401	8.49143		0.260771	0.359404	0.881789	1.59329		0.358403	0.358912	1.03843	1.78585		0.097632	-0.000492	0.156636	0.192555				EESNLPWWRARDKNGQEGYIPSNY	245	268	24
	71	ESNLPWWRARDKNGQEGYIPSN	246	267		5.80217	6.01682	6.09922	6.57215	7.16523		6.20286	6.40968	6.49059	7.08706	7.72513		0.214653	0.297055	0.769979	1.36306		0.206825	0.287727	0.884206	1.52227		-0.007828	-0.009328	0.114227	0.159208				ESNLPWWRARDKNGQEGYIPSN	246	267	22
	72	ESNLPWWRARDKNGQEGYIPSNY	246	268		5.86548	6.11149	6.21159	6.66342	7.46666		6.28807	6.59399	6.65782	7.20391	8.00846		0.246009	0.34611	0.797936	1.60117		0.305918	0.369745	0.91584	1.72039		0.059909	0.023635	0.117904	0.119214				ESNLPWWRARDKNGQEGYIPSNY	246	268	23
	73	AEDSIEM	272	278		3.01824	3.03024	3.05261	3.00118	3.03536		3.12215	3.1031	3.10116	3.07896	3.10358		0.012003	0.034373	-0.017059	0.017116		-0.019048	-0.020982	-0.043184	-0.018568		-0.031051	-0.055355	-0.026125	-0.035684				AEDSIEM	272	278	7
	74	YEWYSKHMTRSQAEQL	279	294		4.96852	5.13183	5.17169	5.36599	5.80113		5.66273	5.74014	5.76388	6.21652	6.66609		0.163308	0.203166	0.397472	0.832607		0.077414	0.101154	0.553795	1.00336		-0.085894	-0.102012	0.156323	0.170753				YEWYSKHMTRSQAEQL	279	294	16
	75	WYSKHMTRSQAEQL	281	294		4.119	4.17131	4.23637	4.31756	4.60424		4.48653	4.59707	4.66656	5.00419	5.40401		0.052307	0.117367	0.198565	0.485239		0.110544	0.180034	0.517659	0.917479		0.058237	0.062667	0.319094	0.43224				WYSKHMTRSQAEQL	281	294	14
	76	YSKHMTRSQA	282	291		4.05309	3.98286	3.91589	4.0661	4.20925		4.07542	4.03209	4.22891	4.1835	4.29635		-0.070229	-0.137196	0.013013	0.156161		-0.043331	0.153486	0.108085	0.220928		0.026898	0.290682	0.095072	0.064767				YSKHMTRSQA	282	291	10
	77	YSKHMTRSQAEQL	282	294		3.4161	3.57967	3.61741	3.78933	3.97599		3.90193	4.05652	4.10786	4.416	4.69038		0.163572	0.201307	0.373236	0.559891		0.154588	0.205927	0.514068	0.788445		-0.008984	0.00462	0.140832	0.228554				YSKHMTRSQAEQL	282	294	13
	78	LLKQEGKEGGF	294	304		4.00589	4.03108	4.11918	4.1795	4.52449		4.34371	4.35551	4.42326	4.66178	4.9016		0.025194	0.113287	0.173612	0.518601		0.011793	0.079548	0.318066	0.557884		-0.013401	-0.033739	0.144454	0.039283				LLKQEGKEGGF	294	304	11
	79	LKQEGKEGGF	295	304		3.37588	3.45242	3.50485	3.67488	3.9162		3.76093	3.86212	3.89981	4.11509	4.31418		0.076541	0.128977	0.298998	0.540325		0.101192	0.138887	0.354161	0.55325		0.024651	0.00991	0.055163	0.012925				LKQEGKEGGF	295	304	10
	80	IVRDSSKAGKY	305	315		5.34043	5.38619	5.36514	5.37576	5.54514		5.35398	5.33583	5.33364	5.40574	5.44028		0.045766	0.02471	0.035332	0.20471		-0.018151	-0.020333	0.051762	0.086299		-0.063917	-0.045043	0.01643	-0.118411				IVRDSSKAGKY	305	315	11
	81	IVRDSSKAGKYTVSV	305	319		5.13629	5.26966	5.33391	5.59874	6.06302								0.133369	0.197621	0.462453	0.926739														IVRDSSKAGKYTVSV	305	319	15
	82	IVRDSSKAGKYTVSVF	305	320		4.77525	4.94066	5.035	5.35171	5.82238								0.165402	0.25975	0.576458	1.04713														IVRDSSKAGKYTVSVF	305	320	16
	83	VRDSSKAGKY	306	315		5.22899	5.17797	5.19825	5.30374	5.41728		5.11994	5.18468	5.23336	5.25669	5.21339		-0.051021	-0.03074	0.074755	0.188293		0.064739	0.113415	0.136742	0.093444		0.11576	0.144155	0.061987	-0.094849				VRDSSKAGKY	306	315	10
	84	FAKSTGEPQGVIRH	320	333		6.53416	6.6041	6.56432	6.55755	6.65059		6.75709	6.82434	6.8957	6.85549	6.99708		0.069949	0.030165	0.023394	0.116431		0.067254	0.138611	0.098404	0.239991		-0.002695	0.108446	0.07501	0.12356				FAKSTGEPQGVIRH	320	333	14
	85	FAKSTGEPQGVIRHYVV	320	336		6.80638	6.92321	6.93276	6.94946	7.19325		7.2489	7.26664	7.32267	7.46587	7.76544		0.116829	0.126382	0.143084	0.386874		0.017743	0.073774	0.216975	0.51654		-0.099086	-0.052608	0.073891	0.129666				FAKSTGEPQGVIRHYVV	320	336	17
	86	FAKSTGEPQGVIRHYVVC	320	337		6.84875	6.96236	7.01426	7.10408	7.39094		7.36418	7.45939	7.45715	7.74137	8.13081		0.113614	0.165514	0.255335	0.542189		0.095207	0.092974	0.377196	0.766629		-0.018407	-0.07254	0.121861	0.22444				FAKSTGEPQGVIRHYVVC	320	337	18
	87	FAKSTGEPQGVIRHYVVCSTPQSQ	320	343		10.6737	10.7985	10.8119	10.9331	11.3467		11.4059	11.3684	11.4552	11.7572	12.3148		0.124866	0.138175	0.259443	0.67299		-0.037436	0.049285	0.351358	0.908943		-0.162302	-0.08889	0.091915	0.235953				FAKSTGEPQGVIRHYVVCSTPQSQ	320	343	24
	88	FAKSTGEPQGVIRHYVVCSTPQSQY	320	344		10.5484	10.646	10.6846	10.8138	11.3386		11.3454	11.4646	11.4156	11.9587	12.4556		0.097596	0.136113	0.26531	0.790185		0.119129	0.070165	0.613306	1.11017		0.021533	-0.065948	0.347996	0.31999				FAKSTGEPQGVIRHYVVCSTPQSQY	320	344	25
	89	AKSTGEPQGVIRH	321	333		6.31231	6.40078	6.38953	6.42304	6.55898		6.55684	6.57378	6.60103	6.62365	6.73043		0.088462	0.077212	0.11073	0.246671		0.016939	0.044187	0.066812	0.173588		-0.071523	-0.033025	-0.043918	-0.073083				AKSTGEPQGVIRH	321	333	13
	90	AKSTGEPQGVIRHYVV	321	336		6.67783	6.69294	6.69344	6.77831	6.99267		6.9789	7.04099	7.08433	7.2866	7.5025		0.015106	0.015609	0.100477	0.314842		0.062086	0.105429	0.307698	0.5236		0.04698	0.08982	0.207221	0.208758				AKSTGEPQGVIRHYVV	321	336	16
	91	AKSTGEPQGVIRHYVVC	321	337		6.70944	6.74779	6.80199	6.90175	7.18879		7.19023	7.24725	7.3091	7.60599	8.00295		0.038351	0.092557	0.192309	0.479355		0.057019	0.118873	0.415764	0.812724		0.018668	0.026316	0.223455	0.333369				AKSTGEPQGVIRHYVVC	321	337	17
	92	PQGVIRHYVVC	327	337		4.49044	4.58652	4.66049	4.77782	5.04666		4.9596	4.97824	5.07315	5.35819	5.74521		0.096076	0.170048	0.287384	0.556225		0.018644	0.113555	0.398594	0.785616		-0.077432	-0.056493	0.11121	0.229391				PQGVIRHYVVC	327	337	11
	93	YVVCSTPQSQY	334	344		3.55013	3.69519	3.69058	3.84477	4.0382		3.90631	4.03206	4.01782	4.28557	4.49767		0.145057	0.14045	0.294639	0.488072		0.125747	0.11151	0.379262	0.591362		-0.01931	-0.02894	0.084623	0.10329				YVVCSTPQSQY	334	344	11
	94	YYLAEKHLFSTI	344	355		4.30708	4.35117	4.35439	4.44372	4.6238		4.60206	4.59856	4.66237	4.73806	4.96865		0.044093	0.047311	0.136646	0.316723		-0.003496	0.060307	0.135998	0.36659		-0.047589	0.012996	-0.000648	0.049867				YYLAEKHLFSTI	344	355	12
	95	YYLAEKHLFSTIPEL	344	358		4.73321	4.82151	4.84401	4.92059	5.08287		5.05933	5.10621	5.09067	5.25651	5.5468		0.088299	0.110797	0.187385	0.34966		0.046878	0.031337	0.197183	0.487471		-0.041421	-0.07946	0.009798	0.137811				YYLAEKHLFSTIPEL	344	358	15
	96	YLAEKHL	345	351		2.95781	2.93736	2.94122	2.89608	2.98375		2.96116	2.96411	2.91774	2.94639	2.91894		-0.020448	-0.016589	-0.061733	0.025937		0.00295	-0.04342	-0.014777	-0.042227		0.023398	-0.026831	0.046956	-0.068164				YLAEKHL	345	351	7
	97	YLAEKHLFSTIPEL	345	358		4.13369	4.237	4.23189	4.31661	4.46122		4.41342	4.52862	4.52667	4.66846	4.81555		0.103303	0.098193	0.18292	0.327523		0.115192	0.113242	0.255032	0.402128		0.011889	0.015049	0.072112	0.074605				YLAEKHLFSTIPEL	345	358	14
	98	LAEKHLFSTIPEL	346	358		3.73218	3.81124	3.81608	3.89651	4.08544		4.03773	4.07703	4.11655	4.27612	4.47322		0.079053	0.083894	0.164331	0.353253		0.039305	0.078821	0.238389	0.43549		-0.039748	-0.005073	0.074058	0.082237				LAEKHLFSTIPEL	346	358	13
	99	AEKHLFSTIPEL	347	358		2.97379	3.02506	3.05858	3.09114	3.24345		3.20657	3.23204	3.28769	3.44382	3.71527		0.05127	0.08479	0.117354	0.26966		0.025478	0.08112	0.237257	0.508707		-0.025792	-0.00367	0.119903	0.239047				AEKHLFSTIPEL	347	358	12
	100	FSTIPEL	352	358		1.94808	1.98008	1.9845	2.03696	2.14115		2.08306	2.12346	2.11739	2.20069	2.32135		0.032	0.036415	0.088879	0.19307		0.040402	0.034327	0.117629	0.238284		0.008402	-0.002088	0.02875	0.045214				FSTIPEL	352	358	7
	101	INYHQHNSAGL	359	369		2.79435	2.89715	2.95245	3.06424	3.23372		3.04917	3.15753	3.17638	3.34032	3.46758		0.102795	0.158093	0.269884	0.439364		0.108359	0.127206	0.291151	0.418409		0.005564	-0.030887	0.021267	-0.020955				INYHQHNSAGL	359	369	11
	102	NYHQHNSAGL	360	369		2.73642	2.86043	2.91329	3.01965	3.21717		2.98129	3.14928	3.14063	3.30042	3.44572		0.124008	0.176873	0.283233	0.480755		0.167998	0.159347	0.319137	0.464435		0.04399	-0.017526	0.035904	-0.01632				NYHQHNSAGL	360	369	10
	103	YHQHNSAGL	361	369		2.60267	2.63772	2.6777	2.82524	2.93257		2.81416	2.88128	2.90205	3.07414	3.17218		0.035049	0.075022	0.22257	0.329893		0.067117	0.087895	0.259978	0.358018		0.032068	0.012873	0.037408	0.028125				YHQHNSAGL	361	369	9
	104	HQHNSAGL	362	369		2.74991	2.72476	2.7211	2.77061	2.82341		2.85394	2.78182	2.80379	2.79153	2.74127		-0.025156	-0.028814	0.020695	0.073495		-0.072117	-0.050149	-0.062404	-0.112669		-0.046961	-0.021335	-0.083099	-0.186164				HQHNSAGL	362	369	8
	105	ISRLKYPVSKQNKNAPSTAGL	370	390		9.80464	9.94574	10.0172	10.1805	10.6374		10.6327	10.6421	10.6904	10.7239	11.0609		0.141099	0.212536	0.375821	0.832742		0.009429	0.057695	0.091177	0.428224		-0.13167	-0.154841	-0.284644	-0.404518				ISRLKYPVSKQNKNAPSTAGL	370	390	21
	106	ISRLKYPVSKQNKNAPSTAGLG	370	391		10.6666	10.7566	10.8255	10.974	11.4076		11.4897	11.3971	11.4793	11.4823	11.8374		0.090043	0.1589	0.307437	0.741012		-0.092594	-0.010393	-0.007314	0.347699		-0.182637	-0.169293	-0.314751	-0.393313				ISRLKYPVSKQNKNAPSTAGLG	370	391	22
	107	ISRLKYPVSKQNKNAPSTAGLGY	370	392		11.4894	11.5764	11.667	11.8299	12.2237		12.3577	12.2557	12.3615	12.2731	12.6019		0.087046	0.177612	0.340486	0.734291		-0.10201	0.003817	-0.084603	0.244229		-0.189056	-0.173795	-0.425089	-0.490062				ISRLKYPVSKQNKNAPSTAGLGY	370	392	23
	108	ISRLKYPVSKQNKNAPSTAGLGYGSW	370	395		12.8387	12.9268	12.9114	13.0204	13.4519		13.6731	13.5787	13.565	13.6114	13.9677		0.088127	0.072726	0.181754	0.613292		-0.094428	-0.108035	-0.061666	0.294598		-0.182555	-0.180761	-0.24342	-0.318694				ISRLKYPVSKQNKNAPSTAGLGYGSW	370	395	26
	109	KQNKNAPSTAGLGYGSW	379	395		9.24131	9.27308	9.15883	9.04116	9.10266		9.44082	9.26845	9.27635	9.07679	9.20566		0.031763	-0.082489	-0.200152	-0.138659		-0.17237	-0.16447	-0.36403	-0.235158		-0.204133	-0.081981	-0.163878	-0.096499				KQNKNAPSTAGLGYGSW	379	395	17
	110	EIDPKDLTF	396	404		3.16628	3.155	3.08229	2.98723	2.87134		3.28867	3.21176	3.22325	3.0175	2.92434		-0.011282	-0.083988	-0.179053	-0.294942		-0.07691	-0.065421	-0.271171	-0.364337		-0.065628	0.018567	-0.092118	-0.069395				EIDPKDLTF	396	404	9
	111	EIDPKDLTFL	396	405		3.35135	3.33566	3.31166	3.20177	3.11304		3.4919	3.43285	3.42989	3.27225	3.17373		-0.015689	-0.039687	-0.149579	-0.238309		-0.059057	-0.062017	-0.219652	-0.318172		-0.043368	-0.02233	-0.070073	-0.079863				EIDPKDLTFL	396	405	10
	112	FLKELGTGQF	404	413		5.3398	5.28732	5.24569	5.13906	4.94048		5.44881	5.33352	5.30924	5.18012	5.0218		-0.052485	-0.094112	-0.200747	-0.399318		-0.115296	-0.139574	-0.268691	-0.427017		-0.062811	-0.045462	-0.067944	-0.027699				FLKELGTGQF	404	413	10
	113	LKELGTGQF	405	413		5.00082	4.90854	4.89325	4.68473	4.49196		5.02499	4.94767	4.96054	4.67598	4.63365		-0.092274	-0.107563	-0.316084	-0.508856		-0.07732	-0.064447	-0.349014	-0.391343		0.014954	0.043116	-0.03293	0.117513				LKELGTGQF	405	413	9
	114	LKELGTGQFGVVKYGKWRGQY	405	425		9.08204	8.96715	8.64247	7.78205	7.13962		9.49081	9.06092	9.05505	7.8241	7.34214		-0.114884	-0.439571	-1.29999	-1.94242		-0.429891	-0.435769	-1.66672	-2.14868		-0.315007	0.003802	-0.366732	-0.206257				LKELGTGQFGVVKYGKWRGQY	405	425	21
	115	KELGTGQF	406	413		4.14244	4.11345	4.0618	3.96037	3.84874		4.21846	4.13732	4.12868	4.00285	3.87962		-0.028991	-0.080642	-0.18207	-0.2937		-0.081137	-0.089775	-0.215609	-0.338839		-0.052146	-0.009133	-0.033539	-0.045139				KELGTGQF	406	413	8
	116	GVVKYGKWRGQY	414	425		4.71861	4.49192	4.30297	3.78491	3.08254		4.93552	4.62871	4.59109	3.84958	3.13117		-0.226689	-0.415643	-0.933708	-1.63607		-0.306811	-0.344427	-1.08594	-1.80435		-0.080122	0.071216	-0.152235	-0.168281				GVVKYGKWRGQY	414	425	12
	117	GVVKYGKWRGQYDVA	414	428		4.88823	4.7912	4.56178	4.08399	3.44326		5.11389	4.9353	4.89099	4.17417	3.49065		-0.097032	-0.326448	-0.804247	-1.44498		-0.178588	-0.222903	-0.939728	-1.62324		-0.081556	0.103545	-0.135481	-0.178262				GVVKYGKWRGQYDVA	414	428	15
	118	VKYGKWRGQY	416	425		3.98311	3.83846	3.72283	3.29557	2.77346		4.15251	3.96636	3.92365	3.34865	2.79176		-0.144648	-0.260284	-0.687541	-1.20965		-0.186148	-0.22886	-0.803857	-1.36074		-0.0415	0.031424	-0.116316	-0.151096				VKYGKWRGQY	416	425	10
	119	KYGKWRGQY	417	425		3.92359	3.8132	3.66012	3.26376	2.84702		4.18347	3.87935	3.79055	3.14271	2.69808		-0.110382	-0.263468	-0.659827	-1.07657		-0.304124	-0.392916	-1.04076	-1.48538		-0.193742	-0.129448	-0.380933	-0.408814				KYGKWRGQY	417	425	9
	120	YGKWRGQ	418	424		3.49454	3.46283	3.20298	2.87788	2.48767		3.63767	3.47643	3.39254	2.96981	2.53634		-0.031707	-0.291561	-0.616659	-1.00687		-0.161231	-0.245128	-0.667857	-1.10133		-0.129524	0.046433	-0.051198	-0.094462				YGKWRGQ	418	424	7
	121	IREGSMSE	432	439		4.19468	4.23806	4.24642	4.17646	4.20621		4.31988	4.31253	4.3299	4.28525	4.27478		0.043371	0.051736	-0.018227	0.011528		-0.00735	0.010024	-0.03463	-0.045097		-0.050721	-0.041712	-0.016403	-0.056625				IREGSMSE	432	439	8
	122	IREGSMSED	432	440		5.09474	5.11957	5.2065	5.10097	5.08001		5.51266	5.31393	5.41124	5.24342	5.17463		0.024836	0.111767	0.006237	-0.014726		-0.198737	-0.101419	-0.269246	-0.338037		-0.223573	-0.213186	-0.275483	-0.323311				IREGSMSED	432	440	9
	123	IREGSMSEDE	432	441		4.71503	4.76693	4.72436	4.66358	4.69548		4.81356	4.80489	4.77194	4.72626	4.74634		0.051903	0.009325	-0.051447	-0.019547		-0.008671	-0.041618	-0.087299	-0.067219		-0.060574	-0.050943	-0.035852	-0.047672				IREGSMSEDE	432	441	10
	124	IREGSMSEDEF	432	442		4.57553	4.62699	4.63582	4.65579	4.78843		4.65487	4.72158	4.67216	4.7569	4.81793		0.051465	0.060294	0.08026	0.212902		0.066711	0.017292	0.10203	0.16306		0.015246	-0.043002	0.02177	-0.049842				IREGSMSEDEF	432	442	11
	125	EEAKVMMNLSHEKL	444	457		6.29494	6.2951	6.41134	6.20834	6.40269		6.46609	6.50576	6.59142	6.43539	6.55574		0.000153	0.116396	-0.086606	0.10775		0.03967	0.125331	-0.030697	0.089648		0.039517	0.008935	0.055909	-0.018102				EEAKVMMNLSHEKL	444	457	14
	126	AKVMMNLSHEKL	446	457		3.04911	3.09304	3.0978	3.18948	3.29434		3.13884	3.17086	3.1734	3.27386	3.31406		0.04393	0.048688	0.140371	0.245224		0.03202	0.034553	0.135014	0.175221		-0.01191	-0.014135	-0.005357	-0.070003				AKVMMNLSHEKL	446	457	12
	127	KVMMNLSHEKL	447	457		2.40632	2.43992	2.40978	2.51111	2.57707		2.52421	2.482	2.49452	2.541	2.63879		0.033595	0.003459	0.104782	0.170747		-0.042207	-0.029685	0.016795	0.114579		-0.075802	-0.033144	-0.087987	-0.056168				KVMMNLSHEKL	447	457	11
	128	MMNLSHEKL	449	457		1.67423	1.82977	1.74841	1.76477	2.00951		1.81772	1.71612	1.80581	1.84373	1.93385		0.155534	0.074178	0.09054	0.335282		-0.101604	-0.011918	0.02601	0.116129		-0.257138	-0.086096	-0.06453	-0.219153				MMNLSHEKL	449	457	9
	129	MNLSHEKL	450	457		1.27633	1.32131	1.42649	1.39332	1.50567		1.32681	1.3412	1.36361	1.49756	1.5206		0.044975	0.150158	0.116988	0.229335		0.014396	0.036805	0.170751	0.193795		-0.030579	-0.113353	0.053763	-0.03554				MNLSHEKL	450	457	8
	130	NLSHEKL	451	457		1.31169	1.38495	1.40575	1.47059	1.56424		1.35506	1.39632	1.4214	1.51362	1.55718		0.073262	0.094066	0.1589	0.252553		0.04126	0.066343	0.158562	0.202123		-0.032002	-0.027723	-0.000338	-0.05043				NLSHEKL	451	457	7
	131	YGVCTKQRPIF	461	471		2.33553	2.30963	2.32707	2.32958	2.39295		2.36039	2.3729	2.36945	2.36567	2.41907		-0.025905	-0.008463	-0.005947	0.057414		0.012506	0.009058	0.005282	0.058679		0.038411	0.017521	0.011229	0.001265				YGVCTKQRPIF	461	471	11
	132	YGVCTKQRPIFIIT	461	474		2.39003	2.41786	2.42197	2.4457	2.48223		2.39528	2.51775	2.50807	2.5525	2.54169		0.027828	0.031938	0.055674	0.092204		0.12247	0.112796	0.15722	0.146416		0.094642	0.080858	0.101546	0.054212				YGVCTKQRPIFIIT	461	474	14
	133	YGVCTKQRPIFIITE	461	475		2.35073	2.41087	2.46707	2.43534	2.51185		2.50559	2.46786	2.46206	2.53584	2.58508		0.060139	0.116338	0.084611	0.16112		-0.037733	-0.043532	0.030252	0.079495		-0.097872	-0.15987	-0.054359	-0.081625				YGVCTKQRPIFIITE	461	475	15
	134	GVCTKQRPIF	462	471		2.11996	2.15907	2.1552	2.12892	2.17721		2.1652	2.18449	2.18473	2.16534	2.22673		0.03911	0.035241	0.008963	0.057254		0.019283	0.019523	0.000135	0.061521		-0.019827	-0.015718	-0.008828	0.004267				GVCTKQRPIF	462	471	10
	135	TKQRPIF	465	471		1.58712	1.65089	1.60225	1.59869	1.57136		1.64076	1.54434	1.54158	1.53611	1.50282		0.063767	0.015131	0.011564	-0.015767		-0.096423	-0.09918	-0.104647	-0.137941		-0.16019	-0.114311	-0.116211	-0.122174				TKQRPIF	465	471	7
	136	EYMANGCL	475	482		3.26009	3.2667	3.23531	3.21704			3.27909	3.21162	3.24568	3.18212			0.006612	-0.024775	-0.043052			-0.067473	-0.033405	-0.096972			-0.074085	-0.00863	-0.05392					EYMANGCL	475	482	8
	137	YMANGCLL	476	483		2.79192	2.79992	2.73517	2.66541			2.81172	2.74683	2.71451	2.71102			0.008002	-0.056752	-0.126506			-0.064894	-0.097217	-0.1007			-0.072896	-0.040465	0.025806					YMANGCLL	476	483	8
	138	LNYLREMRHRFQTQQL	483	498		5.96172	6.06687	5.97898	5.92191			6.0278	6.06797	6.0632	5.98718			0.105151	0.017258	-0.039805			0.040168	0.035392	-0.040626			-0.064983	0.018134	-0.000821					LNYLREMRHRFQTQQL	483	498	16
	139	NYLREMRHRFQTQQL	484	498		7.526	7.57476	7.55394	7.52345			7.58333	7.49901	7.60192	7.60006			0.048757	0.027938	-0.002554			-0.084317	0.018589	0.016727			-0.133074	-0.009349	0.019281					NYLREMRHRFQTQQL	484	498	15
	140	LREMRHRFQTQQL	486	498		5.62784	5.7099	5.69475	5.61983	5.59842		5.68981	5.66429	5.68627	5.55213	5.53229		0.08206	0.066912	-0.008005	-0.029413		-0.025519	-0.003542	-0.137684	-0.157523		-0.107579	-0.070454	-0.129679	-0.12811				LREMRHRFQTQQL	486	498	13
	141	MRHRFQTQQL	489	498		4.06993	4.07077	4.05122	3.9757	3.92274		4.12437	4.05664	4.04618	3.98053	3.91534		0.000838	-0.018709	-0.094233	-0.147193		-0.067725	-0.07819	-0.143841	-0.209021		-0.068563	-0.059481	-0.049608	-0.061828				MRHRFQTQQL	489	498	10
	142	MCKDVCE	501	507		0.05916	0.114988	0.055006	0.087536	0.117275		0.045383	0.043657	0.10417	0.05814	-0.002753		0.055828	-0.004154	0.028376	0.058115		-0.001726	0.058787	0.012757	-0.048136		-0.057554	0.062941	-0.015619	-0.106251				MCKDVCE	501	507	7
	143	MCKDVCEA	501	508		0.083525	0.074809	0.145168	0.152218	0.101019		0.061806	0.076234	0.064537	0.157561	0.055802		-0.008716	0.061643	0.068693	0.017494		0.014428	0.002731	0.095755	-0.006004		0.023144	-0.058912	0.027062	-0.023498				MCKDVCEA	501	508	8
	144	CKDVCEAM	502	509		-0.032202	-0.048666	-0.00206	-0.023295	-0.018763		0.073485	0.15515	0.147785	0.172605	0.172789		-0.016464	0.030142	0.008907	0.013439		0.081665	0.0743	0.09912	0.099304		0.098129	0.044158	0.090213	0.085865				CKDVCEAM	502	509	8
	145	EYLESKQFL	510	518		1.65507	1.68724	1.62863	1.60662	1.55978		1.67546	1.65717	1.68573	1.61658	1.55349		0.032171	-0.026431	-0.04844	-0.095281		-0.018285	0.01027	-0.058876	-0.12197		-0.050456	0.036701	-0.010436	-0.026689				EYLESKQFL	510	518	9
	146	YLESKQFL	511	518		1.82105	1.83024	1.77113	1.74662	1.69326		1.84308	1.80834	1.79477	1.70223	1.66227		0.009192	-0.04992	-0.074427	-0.12779		-0.034741	-0.048312	-0.140859	-0.180814		-0.043933	0.001608	-0.066432	-0.053024				YLESKQFL	511	518	8
	147	YLESKQFLHRDLAARNCL	511	528		2.64233	2.64475	2.628	2.67838	2.72465		2.65221	2.72338	2.67949	2.69604	2.69638		0.002426	-0.014328	0.036051	0.082321		0.071176	0.027285	0.043834	0.044174		0.06875	0.041613	0.007783	-0.038147				YLESKQFLHRDLAARNCL	511	528	18
	148	FLHRDLAA	517	524		0.888955	0.848668	0.821341	0.794367	0.796487		0.949103	0.878095	0.921369	0.873473	0.823798		-0.040287	-0.067614	-0.094588	-0.092468		-0.071008	-0.027734	-0.07563	-0.125305		-0.030721	0.03988	0.018958	-0.032837				FLHRDLAA	517	524	8
	149	FLHRDLAARNCL	517	528		1.24547	1.34037	1.2514	1.37788	1.45003		1.20576	1.21976	1.24688	1.38218	1.44197		0.094893	0.005924	0.132407	0.20456		0.014001	0.041118	0.176422	0.236209		-0.080892	0.035194	0.044015	0.031649				FLHRDLAARNCL	517	528	12
	150	LHRDLAARNC	518	527		1.24586	1.26997	1.27888	1.3691	1.45357		1.21887	1.24851	1.28082	1.33836	1.41219		0.024108	0.033017	0.123232	0.207708		0.029634	0.061951	0.119491	0.193316		0.005526	0.028934	-0.003741	-0.014392				LHRDLAARNC	518	527	10
	151	HRDLAARN	519	526		1.77152	1.69757	1.68954	1.86231	1.93692		1.6827	1.93846	1.9338	1.9303	2.04353		-0.073954	-0.081984	0.090791	0.165398		0.255762	0.251098	0.247607	0.360828		0.329716	0.333082	0.156816	0.19543				HRDLAARN	519	526	8
	152	RNCLVNDQGVVKVSDF	525	540		3.0543	2.7314	2.66807	2.23606	1.91991		2.9182	2.63667	2.67742	2.17805	1.88525		-0.322904	-0.386231	-0.818236	-1.13439		-0.281532	-0.240779	-0.740149	-1.03295		0.041372	0.145452	0.078087	0.101445				RNCLVNDQGVVKVSDF	525	540	16
	153	RNCLVNDQGVVKVSDFGL	525	542		4.38821	3.92207	3.67674	2.90875	2.3087		4.29104	3.83524	3.9683	3.09996	2.22144		-0.466139	-0.711471	-1.47947	-2.07951		-0.455803	-0.322746	-1.19108	-2.06961		0.010336	0.388725	0.288386	0.009899				RNCLVNDQGVVKVSDFGL	525	542	18
	154	CLVNDQGVVKVSD	527	539		2.53957	2.49022	2.48032	2.30891	2.09296		2.50042	2.43972	2.45746	2.18175	1.98259		-0.049349	-0.059247	-0.230654	-0.446606		-0.060701	-0.04296	-0.318665	-0.517825		-0.011352	0.016287	-0.088011	-0.071219				CLVNDQGVVKVSD	527	539	13
	155	CLVNDQGVVKVSDF	527	540		2.97338	2.81589	2.74353	2.28926	1.89364		3.00119	2.80491	2.84022	2.29131	1.85759		-0.157496	-0.229858	-0.68412	-1.07974		-0.196283	-0.160974	-0.709879	-1.1436		-0.038787	0.068884	-0.025759	-0.063861				CLVNDQGVVKVSDF	527	540	14
	156	VNDQGVVKVSD	529	539		2.17069	2.10141	2.043	1.88821	1.72027		2.20718	2.07636	2.06778	1.87768	1.70469		-0.069278	-0.127685	-0.282482	-0.450424		-0.130816	-0.139394	-0.329496	-0.502483		-0.061538	-0.011709	-0.047014	-0.052059				VNDQGVVKVSD	529	539	11
	157	VNDQGVVKVSDF	529	540		2.42321	2.28434	2.19825	1.86776	1.44057		2.52362	2.32534	2.29187	1.89024	1.46659		-0.138873	-0.224966	-0.555455	-0.982646		-0.198281	-0.231749	-0.63338	-1.05703		-0.059408	-0.006783	-0.077925	-0.074386				VNDQGVVKVSDF	529	540	12
	158	VNDQGVVKVSDFGL	529	542		3.62154	3.36762	3.16983	2.604	1.85726		3.76844	3.39883	3.3214	2.60316	1.89648		-0.253925	-0.451715	-1.01755	-1.76428		-0.369619	-0.447043	-1.16528	-1.87196		-0.115694	0.004672	-0.147738	-0.107678				VNDQGVVKVSDFGL	529	542	14
	159	VNDQGVVKVSDFGLS	529	543		4.62507	4.41788	4.22807	3.55138	2.83678		4.70707	4.41343	4.34983	3.48673	2.85269		-0.207197	-0.396998	-1.0737	-1.78829		-0.293643	-0.357239	-1.22034	-1.85438		-0.086446	0.039759	-0.14664	-0.066088				VNDQGVVKVSDFGLS	529	543	15
	160	VNDQGVVKVSDFGLSR	529	544		5.78717	5.56072	5.37912	4.49439	3.83435		5.83641	5.5077	5.54028	4.60025	3.91259		-0.226453	-0.408046	-1.29278	-1.95281		-0.328717	-0.296131	-1.23617	-1.92382		-0.102264	0.111915	0.056616	0.028994				VNDQGVVKVSDFGLSR	529	544	16
	161	VNDQGVVKVSDFGLSRY	529	545		6.24272	6.07348	5.80042	5.06121	4.35127		6.35802	5.96213	5.93125	4.97363	4.30401		-0.169236	-0.442296	-1.18151	-1.89145		-0.395886	-0.426767	-1.38438	-2.05401		-0.22665	0.015529	-0.202874	-0.162562				VNDQGVVKVSDFGLSRY	529	545	17
	162	VNDQGVVKVSDFGLSRYVL	529	547		7.64865	7.45332	7.26316	6.4848	5.88412		7.77596	7.47985	7.37458	6.48911	5.9249		-0.195334	-0.385496	-1.16386	-1.76454		-0.296111	-0.401376	-1.28685	-1.85106		-0.100777	-0.01588	-0.122996	-0.086524				VNDQGVVKVSDFGLSRYVL	529	547	19
	163	VNDQGVVKVSDFGLSRYVLDD	529	549		8.36594	8.29771	8.08962	7.26503	6.53145		8.62989	8.42577	8.3364	7.2522	6.88329		-0.068233	-0.276319	-1.10091	-1.83449		-0.204115	-0.293484	-1.37769	-1.7466		-0.135882	-0.017165	-0.276781	0.087891				VNDQGVVKVSDFGLSRYVLDD	529	549	21
	164	VVKVSDF	534	540		1.30668	1.15064	1.05939	0.691036	0.231155		1.22946	1.11314	1.13139	0.624014	0.208919		-0.156033	-0.24729	-0.615639	-1.07552		-0.116327	-0.098071	-0.605449	-1.02054		0.039706	0.149219	0.01019	0.054976				VVKVSDF	534	540	7
	165	VVKVSDFGL	534	542		2.73179	2.44663	2.21588	1.52859	0.815882		2.6935	2.38601	2.36132	1.46629	0.753243		-0.285155	-0.515907	-1.2032	-1.91591		-0.307489	-0.332177	-1.22721	-1.94026		-0.022334	0.18373	-0.024006	-0.02435				VVKVSDFGL	534	542	9
	166	FGLSRYVL	540	547		4.45025	4.35971	4.36322	4.07678	3.9764		4.53626	4.41292	4.4436	4.11649	4.08621		-0.090546	-0.087032	-0.373474	-0.473858		-0.123336	-0.092658	-0.419772	-0.450051		-0.03279	-0.005626	-0.046298	0.023807				FGLSRYVL	540	547	8
	167	FGLSRYVLDD	540	549		4.82586	4.83033	4.77793	4.64809	4.44909		4.90447	4.91601	4.87194	4.68708	4.48074		0.004467	-0.047924	-0.177767	-0.376773		0.011544	-0.032525	-0.217383	-0.423726		0.007077	0.015399	-0.039616	-0.046953				FGLSRYVLDD	540	549	10
	168	FGLSRYVLDDE	540	550		5.10359	4.9871	5.14269	4.91249	4.708		5.19446	5.24291	5.22674	4.9793	4.81688		-0.116486	0.0391	-0.191094	-0.395587		0.048445	0.032275	-0.215163	-0.377584		0.164931	-0.006825	-0.024069	0.018003				FGLSRYVLDDE	540	550	11
	169	GLSRYVL	541	547		3.72022	3.73886	3.7254	3.66467	3.69219		3.77075	3.72647	3.74735	3.68556	3.69497		0.018647	0.005186	-0.055548	-0.028021		-0.044276	-0.023397	-0.085194	-0.075775		-0.062923	-0.028583	-0.029646	-0.047754				GLSRYVL	541	547	7
	170	GLSRYVLDD	541	549		4.79135	4.80111	4.84212	4.757	4.73126		4.85389	4.80565	4.81458	4.81145	4.79103		0.009764	0.050774	-0.034347	-0.060092		-0.04824	-0.039308	-0.042436	-0.062862		-0.058004	-0.090082	-0.008089	-0.00277				GLSRYVLDD	541	549	9
	171	GLSRYVLDDE	541	550		5.02882	5.03227	5.01552	4.9717	5.0427		5.13408	5.07083	5.08937	5.07684	5.10661		0.003446	-0.013303	-0.057122	0.013881		-0.06324	-0.044706	-0.057239	-0.027468		-0.066686	-0.031403	-0.000117	-0.041349				GLSRYVLDDE	541	550	10
	172	SRYVLDD	543	549		3.51101	3.53598	3.52379	3.44278	3.48118		3.52359	3.56731	3.48932	3.48997	3.4375		0.024969	0.012784	-0.068234	-0.02983		0.043718	-0.034274	-0.033622	-0.086087		0.018749	-0.047058	0.034612	-0.056257				SRYVLDD	543	549	7
	173	SRYVLDDE	543	550		3.64033	3.7156	3.65053	3.6254	3.65275		3.79059	3.72623	3.74878	3.76032	3.73423		0.075269	0.010199	-0.014934	0.012418		-0.06436	-0.041808	-0.030265	-0.056354		-0.139629	-0.052007	-0.015331	-0.068772				SRYVLDDE	543	550	8
	174	EYTSSVGSKF	550	559		4.73611	4.79996	4.80114	4.73361	4.74336		4.79184	4.81422	4.79386	4.74246	4.74863		0.063858	0.065035	-0.002494	0.007256		0.022379	0.002019	-0.04938	-0.043213		-0.041479	-0.063016	-0.046886	-0.050469				EYTSSVGSKF	550	559	10
	175	EYTSSVGSKFPVRWSPPEVL	550	569		7.41234	7.43288	7.39987	7.4642	7.74295		7.52109	7.50997	7.53973	7.58237	7.77883		0.020534	-0.012475	0.051861	0.330605		-0.011119	0.018638	0.061279	0.257733		-0.031653	0.031113	0.009418	-0.072872				EYTSSVGSKFPVRWSPPEVL	550	569	20
	176	YTSSVGSKF	551	559		4.18591	4.23692	4.21478	4.18446	4.22473		4.25179	4.31212	4.27157	4.28759	4.26486		0.051014	0.028872	-0.001447	0.038821		0.060329	0.019784	0.035804	0.013067		0.009315	-0.009088	0.037251	-0.025754				YTSSVGSKF	551	559	9
	177	YTSSVGSKFPVRWSPPEVL	551	569		6.45	6.5564	6.50683	6.58857	6.78423		6.54872	6.55553	6.5758	6.72821	6.8253		0.106403	0.056827	0.138575	0.334233		0.006802	0.027076	0.179488	0.276578		-0.099601	-0.029751	0.040913	-0.057655				YTSSVGSKFPVRWSPPEVL	551	569	19
	178	TSSVGSKFPVRWSPPEVL	552	569		6.2221	6.40901	6.40704	6.52678	6.66134		6.38374	6.48501	6.4783	6.51099	6.65842		0.186912	0.184935	0.304679	0.439238		0.101275	0.094559	0.127252	0.274681		-0.085637	-0.090376	-0.177427	-0.164557				TSSVGSKFPVRWSPPEVL	552	569	18
	179	PVRWSPPEVL	560	569		2.03978	2.08949	2.06133	2.17366	2.3448		2.09942	2.10899	2.13862	2.22744	2.39439		0.049712	0.021556	0.133882	0.305022		0.009572	0.039201	0.128024	0.294964		-0.04014	0.017645	-0.005858	-0.010058				PVRWSPPEVL	560	569	10
	180	MYSKFSSKSDIWA	570	582		2.54001	2.67399	2.64708	2.69077	2.61695		2.67711	2.7701	2.77717	2.82066	2.68401		0.133985	0.107072	0.150762	0.076944		0.092989	0.100051	0.143545	0.006896		-0.040996	-0.007021	-0.007217	-0.070048				MYSKFSSKSDIWA	570	582	13
	181	YSKFSSKSDIWA	571	582		2.54698	2.61182	2.60164	2.54885	2.49376		2.64145	2.66846	2.67577	2.61181	2.5416		0.064844	0.054664	0.001878	-0.053214		0.027012	0.03432	-0.029644	-0.099848		-0.037832	-0.020344	-0.031522	-0.046634				YSKFSSKSDIWA	571	582	12
	182	YSKFSSKSDIWAF	571	583		2.21724	2.22501	2.27438	2.18709	2.11623		2.29955	2.28267	2.29114	2.24776	2.21535		0.007772	0.057136	-0.030149	-0.101016		-0.016872	-0.008407	-0.051792	-0.084202		-0.024644	-0.065543	-0.021643	0.016814				YSKFSSKSDIWAF	571	583	13
	183	SSKSDIWA	575	582		1.20454	1.2003	1.15903	1.14484	1.12081		1.21151	1.22712	1.20932	1.1727	1.12958		-0.004243	-0.045511	-0.059701	-0.083727		0.015611	-0.00219	-0.038815	-0.08193		0.019854	0.043321	0.020886	0.001797				SSKSDIWA	575	582	8
	184	SSKSDIWAF	575	583		0.715935	0.713045	0.720513	0.704879	0.666536		0.739808	0.733666	0.740868	0.698426	0.699444		-0.00289	0.004578	-0.011056	-0.049399		-0.006142	0.00106	-0.041382	-0.040364		-0.003252	-0.003518	-0.030326	0.009035				SSKSDIWAF	575	583	9
	185	MWEIYSL	587	593		0.060687	0.062532	0.080086	0.120826	0.084465		0.027269	0.097606	0.093038	0.134182	0.07568		0.001845	0.019399	0.060139	0.023778		0.070337	0.065769	0.106913	0.048411		0.068492	0.04637	0.046774	0.024633				MWEIYSL	587	593	7
	186	MWEIYSLGKMPYERF	587	601		4.03559	4.09315	4.09766	4.18165	4.22697		4.04831	4.05804	4.08399	4.14805	4.21206		0.05756	0.062071	0.146066	0.191385		0.009731	0.035679	0.099741	0.163745		-0.047829	-0.026392	-0.046325	-0.02764				MWEIYSLGKMPYERF	587	601	15
	187	MWEIYSLGKMPYERFTNSE	587	605		6.23991	6.23307	6.3378	6.39678	6.3745		6.24766	6.33087	6.38598	6.4268	6.40894		-0.006838	0.097894	0.156869	0.134595		0.083205	0.138316	0.179132	0.161274		0.090043	0.040422	0.022263	0.026679				MWEIYSLGKMPYERFTNSE	587	605	19
	188	WEIYSLGKM	588	596		1.35588	1.28614	1.30225	1.3557	1.49556		1.30191	1.33302	1.39552	1.34544	1.50988		-0.069739	-0.05363	-0.000186	0.139682		0.031113	0.093614	0.043537	0.207979		0.100852	0.147244	0.043723	0.068297				WEIYSLGKM	588	596	9
	189	WEIYSLGKMPYE	588	599		2.64303	2.70365	2.71387	2.79758	2.85967		2.66661	2.79096	2.79001	2.90803	2.94491		0.060615	0.070834	0.154542	0.216636		0.124353	0.123399	0.241425	0.278304		0.063738	0.052565	0.086883	0.061668				WEIYSLGKMPYE	588	599	12
	190	WEIYSLGKMPYERF	588	601		4.20756	4.26346	4.2662	4.28745	4.37391		4.23234	4.29449	4.33178	4.30352	4.4055		0.055894	0.058641	0.079885	0.16635		0.06215	0.099437	0.071184	0.173155		0.006256	0.040796	-0.008701	0.006805				WEIYSLGKMPYERF	588	601	14
	191	WEIYSLGKMPYERFTNS	588	604		5.87594	5.92271	5.88387	5.92168	6.01791		5.92509	5.98024	5.96543	5.95806	6.0651		0.046768	0.007924	0.045735	0.14197		0.055147	0.040339	0.032968	0.140013		0.008379	0.032415	-0.012767	-0.001957				WEIYSLGKMPYERFTNS	588	604	17
	192	WEIYSLGKMPYERFTNSE	588	605		6.24366	6.26311	6.2537	6.2587	6.43965		6.30219	6.24111	6.33133	6.3316	6.43505		0.019446	0.010039	0.015041	0.195988		-0.061079	0.029142	0.029406	0.13286		-0.080525	0.019103	0.014365	-0.063128				WEIYSLGKMPYERFTNSE	588	605	18
	193	WEIYSLGKMPYERFTNSET	588	606		7.15224	7.20907	7.12583	7.1353	7.36013		7.16218	7.134	7.27188	7.16906	7.2744		0.056829	-0.026417	-0.016942	0.207886		-0.028175	0.109704	0.006884	0.112226		-0.085004	0.136121	0.023826	-0.09566				WEIYSLGKMPYERFTNSET	588	606	19
	194	WEIYSLGKMPYERFTNSETAE	588	608		7.86763	7.96543	8.07304	8.12382	8.20756		7.93725	8.10408	8.10514	8.10667	8.2819		0.097798	0.205412	0.256193	0.339928		0.166834	0.167888	0.169427	0.344648		0.069036	-0.037524	-0.086766	0.00472				WEIYSLGKMPYERFTNSETAE	588	608	21
	195	IYSLGKMPYERF	590	601		4.27941	4.30168	4.28312	4.31088	4.51574		4.35877	4.36494	4.34533	4.37924	4.43936		0.022263	0.003707	0.031467	0.236321		0.006177	-0.013434	0.020469	0.080597		-0.016086	-0.017141	-0.010998	-0.155724				IYSLGKMPYERF	590	601	12
	196	IYSLGKMPYERFTNS	590	604		6.29564	6.26515	6.2413	6.33854	6.27108		6.5144	6.40941	6.42853	6.41357	6.48722		-0.030499	-0.054347	0.042894	-0.024562		-0.104982	-0.085867	-0.100823	-0.027176		-0.074483	-0.03152	-0.143717	-0.002614				IYSLGKMPYERFTNS	590	604	15
	197	IYSLGKMPYERFTNSE	590	605		6.71509	6.71784	6.57998	6.64849	6.79829		6.80504	6.76155	6.7723	6.6545	6.85667		0.002753	-0.135114	-0.066601	0.083198		-0.043486	-0.032736	-0.150536	0.051633		-0.046239	0.102378	-0.083935	-0.031565				IYSLGKMPYERFTNSE	590	605	16
	198	IYSLGKMPYERFTNSETAE	590	608		8.31651	8.34708	8.35927	8.31626	8.56207		8.66468	8.39423	8.60333	8.48841	8.61653		0.030563	0.042752	-0.000249	0.245553		-0.270445	-0.061343	-0.176266	-0.048147		-0.301008	-0.104095	-0.176017	-0.2937				IYSLGKMPYERFTNSETAE	590	608	19
	199	GKMPYERF	594	601		3.59286	3.58188	3.62759	3.59014	3.62579		3.62718	3.60517	3.61722	3.60696	3.60099		-0.010976	0.034728	-0.002714	0.032927		-0.022011	-0.009965	-0.020227	-0.026192		-0.011035	-0.044693	-0.017513	-0.059119				GKMPYERF	594	601	8
	200	GKMPYERFTNSE	594	605		5.89849	5.89308	5.90749	5.89372	5.93158		6.01828	5.95248	5.99464	5.91748	5.9128		-0.005415	0.008997	-0.004772	0.033089		-0.065799	-0.023642	-0.100803	-0.105478		-0.060384	-0.032639	-0.096031	-0.138567				GKMPYERFTNSE	594	605	12
	201	GKMPYERFTNSETAE	594	608		7.65794	7.65344	7.66397	7.55208	7.66968		7.69276	7.70162	7.70207	7.59971	7.62512		-0.0045	0.006031	-0.105857	0.011739		0.008858	0.009313	-0.093053	-0.067638		0.013358	0.003282	0.012804	-0.079377				GKMPYERFTNSETAE	594	608	15
	202	RFTNSETAE	600	608		4.61279	4.66319	4.56742	4.59671	4.72892		4.63353	4.73911	4.6615	4.65047	4.55083		0.050398	-0.045371	-0.016088	0.116129		0.105585	0.02797	0.016947	-0.082699		0.055187	0.073341	0.033035	-0.198828				RFTNSETAE	600	608	9
	203	TNSETAE	602	608		3.48008	3.54863	3.51035	3.5154	3.56964		3.5715	3.59349	3.47979	3.57127	3.61651		0.068551	0.030272	0.035327	0.089565		0.021982	-0.091715	-0.000235	0.045004		-0.046569	-0.121987	-0.035562	-0.044561				TNSETAE	602	608	7
	204	TNSETAEHIAQGLRLPRPHL	602	621		9.24173	9.37146	9.32072	9.49158	9.63096		9.37736	9.4539	9.51521	9.591	9.6732		0.129724	0.078991	0.249851	0.389224		0.076548	0.137851	0.21364	0.29584		-0.053176	0.05886	-0.036211	-0.093384				TNSETAEHIAQGLRLPRPHL	602	621	20
	205	TNSETAEHIAQGLRLPRPHLAS	602	623		9.57657	9.83296	9.81355	9.87983	10.0883		9.74763	10.0206	9.83938	9.90968	10.0828		0.256398	0.236985	0.303266	0.511705		0.272954	0.09175	0.162048	0.335182		0.016556	-0.145235	-0.141218	-0.176523				TNSETAEHIAQGLRLPRPHLAS	602	623	22
	206	TAEHIAQG	606	613		4.03638	3.96356	4.07199	4.11406	4.27484		4.30183	4.06277	4.07044	4.07494	4.0215		-0.072823	0.035612	0.077679	0.238461		-0.239061	-0.231397	-0.226897	-0.280329		-0.166238	-0.267009	-0.304576	-0.51879				TAEHIAQG	606	613	8
	207	TAEHIAQGLRLPRPHL	606	621		6.42104	6.52022	6.54078	6.59192	6.75869		6.50769	6.5014	6.54687	6.60146	6.70566		0.099174	0.119733	0.170882	0.33765		-0.006291	0.039178	0.093775	0.197974		-0.105465	-0.080555	-0.077107	-0.139676				TAEHIAQGLRLPRPHL	606	621	16
	208	TAEHIAQGLRLPRPHLAS	606	623		6.78939	6.86266	6.86287	6.88644	7.07709		6.95338	6.92321	6.94079	6.9927	7.13284		0.073271	0.073481	0.097043	0.287695		-0.030175	-0.012589	0.039318	0.179459		-0.103446	-0.08607	-0.057725	-0.108236				TAEHIAQGLRLPRPHLAS	606	623	18
	209	TAEHIAQGLRLPRPHLASE	606	624		7.06867	7.18247	7.2028	7.1449	7.36509		7.19269	7.28256	7.22837	7.31396	7.45741		0.113804	0.134133	0.076231	0.29642		0.089865	0.035681	0.12127	0.264723		-0.023939	-0.098452	0.045039	-0.031697				TAEHIAQGLRLPRPHLASE	606	624	19
	210	AEHIAQGLRLPRPHL	607	621		5.60573	5.57982	5.68136	5.62541	5.81162		5.63163	5.64009	5.63942	5.73195	5.78445		-0.025907	0.075624	0.01968	0.205885		0.008457	0.00779	0.10032	0.152817		0.034364	-0.067834	0.08064	-0.053068				AEHIAQGLRLPRPHL	607	621	15
	211	AEHIAQGLRLPRPHLAS	607	623		6.03883	6.07601	6.09361	6.09478	6.21362		6.1814	6.15153	6.26577	6.15656	6.29528		0.037173	0.054773	0.055945	0.174783		-0.029876	0.084364	-0.024842	0.113878		-0.067049	0.029591	-0.080787	-0.060905				AEHIAQGLRLPRPHLAS	607	623	17
	212	HIAQGLRLPRPHL	609	621		4.71009	4.78835	4.80459	4.80096	4.85849		4.78898	4.81588	4.81761	4.87013	4.83801		0.078265	0.094502	0.090875	0.148397		0.026904	0.028637	0.081151	0.04903		-0.051361	-0.065865	-0.009724	-0.099367				HIAQGLRLPRPHL	609	621	13
	213	HIAQGLRLPRPHLAS	609	623		5.06773	5.08094	5.05295	5.10723	5.15458		5.15615	5.15123	5.1642	5.21632	5.20608		0.013216	-0.014772	0.039503	0.086858		-0.00492	0.008051	0.060172	0.049927		-0.018136	0.022823	0.020669	-0.036931				HIAQGLRLPRPHLAS	609	623	15
	214	HIAQGLRLPRPHLASE	609	624		5.52451	5.5986	5.60371	5.55875	5.64449		5.67157	5.66786	5.67462	5.65268	5.70093		0.074092	0.079198	0.034234	0.119982		-0.003713	0.003053	-0.01889	0.029365		-0.077805	-0.076145	-0.053124	-0.090617				HIAQGLRLPRPHLASE	609	624	16
	215	HIAQGLRLPRPHLASERV	609	626		6.63112	6.73596	6.65609	6.63502	6.71254		6.84013	6.83646	6.79416	6.75413	6.84425		0.104834	0.02497	0.003897	0.08142		-0.003663	-0.045965	-0.085995	0.004125		-0.108497	-0.070935	-0.089892	-0.077295				HIAQGLRLPRPHLASERV	609	626	18
	216	QGLRLPRPHLAS	612	623		4.25206	4.28229	4.20981	4.12632	4.26986		4.22455	4.20563	4.16473	4.06049	4.12036		0.030234	-0.042244	-0.125735	0.017798		-0.018923	-0.05982	-0.16406	-0.104192		-0.049157	-0.017576	-0.038325	-0.12199				QGLRLPRPHLAS	612	623	12
	217	GLRLPRPHL	613	621		3.88097	3.94961	4.03928	4.0717	4.19642		4.0804	3.99779	4.04343	3.98274	4.01809		0.068643	0.158311	0.190735	0.315453		-0.082606	-0.036973	-0.097661	-0.06231		-0.151249	-0.195284	-0.288396	-0.377763				GLRLPRPHL	613	621	9
	218	LRLPRPHL	614	621		2.02959	2.0094	2.03941	2.03003	2.03344		2.04558	1.99162	2.00621	1.99552	2.00348		-0.02019	0.00982	0.000442	0.00385		-0.053957	-0.039366	-0.050057	-0.042102		-0.033767	-0.049186	-0.050499	-0.045952				LRLPRPHL	614	621	8
	219	LRLPRPHLAS	614	623		2.27626	2.31247	2.3298	2.30851	2.28816		2.33275	2.34617	2.3717	2.36553	2.33798		0.036207	0.053535	0.032243	0.011894		0.013421	0.038958	0.032783	0.005229		-0.022786	-0.014577	0.00054	-0.006665				LRLPRPHLAS	614	623	10
	220	LRLPRPHLASE	614	624		2.74117	2.78867	2.76621	2.781	2.7519		2.83292	2.82348	2.83758	2.81331	2.81217		0.047495	0.025043	0.039834	0.010732		-0.00944	0.004662	-0.019614	-0.020746		-0.056935	-0.020381	-0.059448	-0.031478				LRLPRPHLASE	614	624	11
	221	ERVYTIM	624	630		0.818288	0.769124	0.804591	0.802509	0.788384		0.914193	0.920249	0.941834	0.901935	0.892737		-0.049164	-0.013697	-0.015779	-0.029904		0.006056	0.027641	-0.012258	-0.021456		0.05522	0.041338	0.003521	0.008448				ERVYTIM	624	630	7
	222	YSCWHEKA	631	638		2.06309	2.10657	2.17551	1.97792	1.97249		2.03284	2.00574	2.13835	1.98369	2.0621		0.043482	0.112426	-0.085169	-0.090593		-0.0271	0.105512	-0.049145	0.029257		-0.070582	-0.006914	0.036024	0.11985				YSCWHEKA	631	638	8
	223	YSCWHEKADERPSF	631	644		2.90168	2.90358	2.90597	2.84895	2.88415		2.90621	2.9072	2.91464	2.89873	2.86668		0.001891	0.004287	-0.052739	-0.017536		0.000986	0.008428	-0.007486	-0.039535		-0.000905	0.004141	0.045253	-0.021999				YSCWHEKADERPSF	631	644	14
	224	SCWHEKADERPSF	632	644		2.57745	2.59915	2.6152	2.57198	2.53572		2.66917	2.69363	2.7031	2.67558	2.65843		0.021696	0.037748	-0.005467	-0.041732		0.024461	0.033934	0.006414	-0.010743		0.002765	-0.003814	0.011881	0.030989				SCWHEKADERPSF	632	644	13
	225	CWHEKADERPSF	633	644		2.78117	2.78841	2.78878	2.71378	2.70969		2.84715	2.768	2.78471	2.73829	2.79425		0.007245	0.007613	-0.06739	-0.071474		-0.079152	-0.062436	-0.108862	-0.052901		-0.086397	-0.070049	-0.041472	0.018573				CWHEKADERPSF	633	644	12
	226	WHEKADERPSF	634	644		2.98696	2.97882	3.01498	2.95039	2.89188		3.05961	3.03064	3.03843	3.01185	2.99972		-0.008139	0.028017	-0.036569	-0.095079		-0.028969	-0.021176	-0.047756	-0.059891		-0.02083	-0.049193	-0.011187	0.035188				WHEKADERPSF	634	644	11
	227	HEKADERPSF	635	644		2.612	2.66058	2.61628	2.62133	2.62616		2.64349	2.66415	2.66707	2.64832	2.65386		0.048572	0.004278	0.009331	0.014161		0.020658	0.023581	0.004822	0.010365		-0.027914	0.019303	-0.004509	-0.003796				HEKADERPSF	635	644	10
	228	KADERPSF	637	644		1.94403	1.96832	1.99515	1.8424	1.94591		1.91215	2.03017	1.93973	1.92522	1.95289		0.024296	0.051127	-0.101631	0.001885		0.118019	0.027576	0.013075	0.040742		0.093723	-0.023551	0.114706	0.038857				KADERPSF	637	644	8
	229	KILLSNIL	645	652		0.027165	0.032052	0.04746	0.093626	0.067635		0.033794	0.07736	0.081958	0.109127	0.062803		0.004887	0.020295	0.066461	0.04047		0.043566	0.048164	0.075333	0.029009		0.038679	0.027869	0.008872	-0.011461				KILLSNIL	645	652	8
	230	KILLSNILD	645	653		0.131842	0.113403	0.1045	0.130476	0.123082		0.080347	0.08111	0.087854	0.103595	0.108969		-0.018439	-0.027342	-0.001366	-0.00876		0.000763	0.007507	0.023248	0.028622		0.019202	0.034849	0.024614	0.037382				KILLSNILD	645	653	9
	231	KILLSNILDV	645	654		0.136615	0.117251	0.13075	0.121688	0.126722		0.142754	0.151328	0.152616	0.195485	0.164762		-0.019364	-0.005865	-0.014927	-0.009893		0.008574	0.009862	0.052731	0.022008		0.027938	0.015727	0.067658	0.031901				KILLSNILDV	645	654	10
	232	DVMDEESHHHHHH	653	665		2.55508	2.68225	2.65728	2.66592	2.69646		2.67277	2.7146	2.69156	2.753	2.68018		0.127171	0.102198	0.110836	0.141383		0.041831	0.018793	0.080237	0.007409		-0.08534	-0.083405	-0.030599	-0.133974				DVMDEESHHHHHH	653	665	13
	233	VMDEESHHHHHH	654	665		2.29391	2.2722	2.34652	2.2861	2.35925		2.27681	2.30523	2.23974	2.29782	2.3466		-0.021708	0.052615	-0.007807	0.065343		0.028422	-0.03707	0.021008	0.069786		0.05013	-0.089685	0.028815	0.004443				VMDEESHHHHHH	654	665	12
	234	MDEESHHHHHH	655	665		1.86508	1.92579	1.91346	1.93647	1.9381		1.93748	1.94073	1.93812	1.89265	1.93467		0.060713	0.048378	0.071389	0.073021		0.003255	0.000645	-0.044824	-0.002802		-0.057458	-0.047733	-0.116213	-0.075823				MDEESHHHHHH	655	665	11
	235	DEESHHHHHH	656	665		1.70389	1.68825	1.71457	1.72049	1.73469		1.73206	1.71735	1.66195	1.75639	1.72927		-0.015633	0.010686	0.016605	0.030808		-0.014715	-0.070114	0.024325	-0.00279		0.000918	-0.0808	0.00772	-0.033598				DEESHHHHHH	656	665	10
	236	EESHHHHHH	657	665		1.62909	1.69702	1.71131	1.7826	1.68432		1.64648	1.56446	1.60186	1.63953	1.59084		0.067925	0.082215	0.153505	0.055222		-0.082019	-0.044623	-0.006948	-0.055639		-0.149944	-0.126838	-0.160453	-0.110861				EESHHHHHH	657	665	9
	237	ESHHHHHH	658	665		1.26026	1.38583	1.35946	1.39501	1.35911		1.42582	1.41474	1.22455	1.36436	1.27056		0.125564	0.099196	0.13475	0.098849		-0.011073	-0.201269	-0.061455	-0.155256		-0.136637	-0.300465	-0.196205	-0.254105				ESHHHHHH	658	665	8
	238	SHHHHHH	659	665		1.07156	1.18394	1.31066	1.36092	0.949241		1.1277	1.23599	1.32471	1.19756	1.29269		0.112385	0.239099	0.289364	-0.122318		0.108292	0.197002	0.069861	0.16499		-0.004093	-0.042097	-0.219503	0.287308				SHHHHHH	659	665	7
																																						13.4286
